# Supplementary material for: Synthesis of (Z)-3-aryloxy-acrylonitriles, (E)-3-aryloxy-acrylonitriles and 3-cyanobenzofurans through the sequential reactions of phenols with propiolonitriles
Source: Royal Society of Chemistry journal article supplement (doi:10.1039/c2ob25969a), 2012-01-01
Supplement: c2ob25969a.pdf [file c2ob25969a.pdf]

Supplementary Material (ESI) for Organic & Biomolecular Chemistry

This journal is (c) The Royal Society of Chemistry 2012

**Synthesis of (Z)-3-Aryloxy-acrylonitriles, (E)-3-Aryloxy-acrylonitriles  
and 3-Cyanobenzofurans through the Sequential Reactions of Phenols  
with Propiolonitriles**

Wei Zhou,<sup>†</sup> Yicheng Zhang,<sup>†</sup> Pinhua Li,<sup>†</sup> and Lei Wang\*<sup>†,‡</sup>

<sup>†</sup> *Department of Chemistry, Huaibei Normal University, Huaibei, Anhui 235000, P. R. China*

<sup>‡</sup> *State Key Laboratory of Organometallic Chemistry, Shanghai Institute of Organic Chemistry*

*Shanghai 200032, P. R. China*

*leiwang@chnu.edu.cn*

***Table of Contents for Supporting Information***

<sup>1</sup>H, <sup>13</sup>C NMR and HRMS spectra of the products..... 2

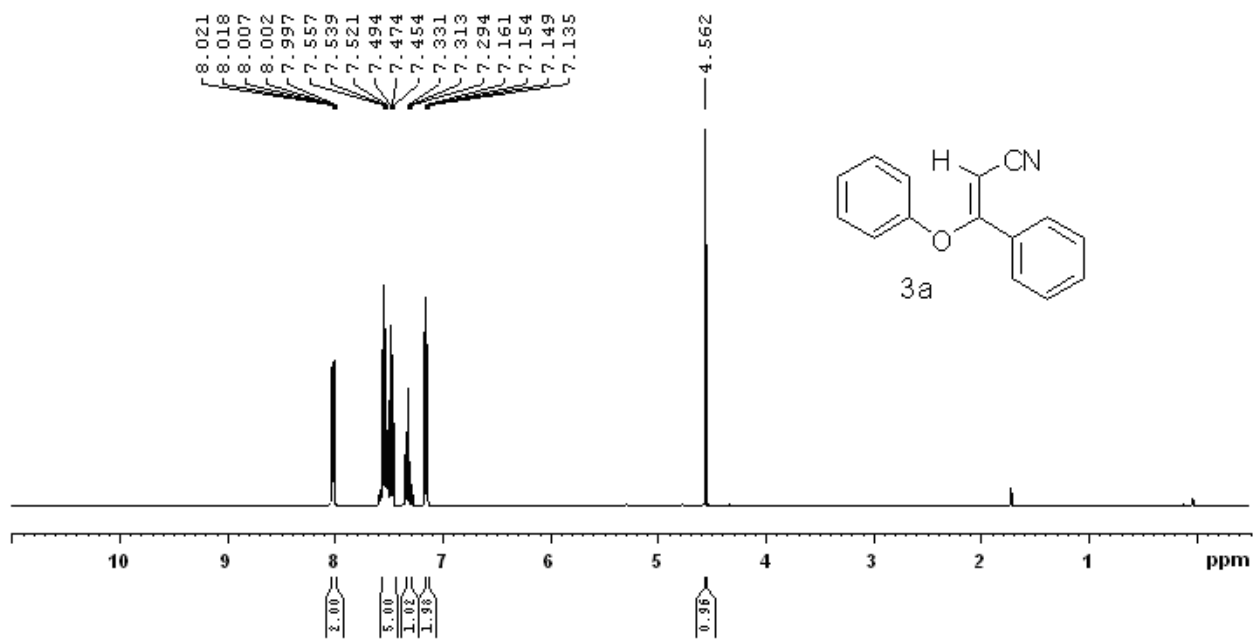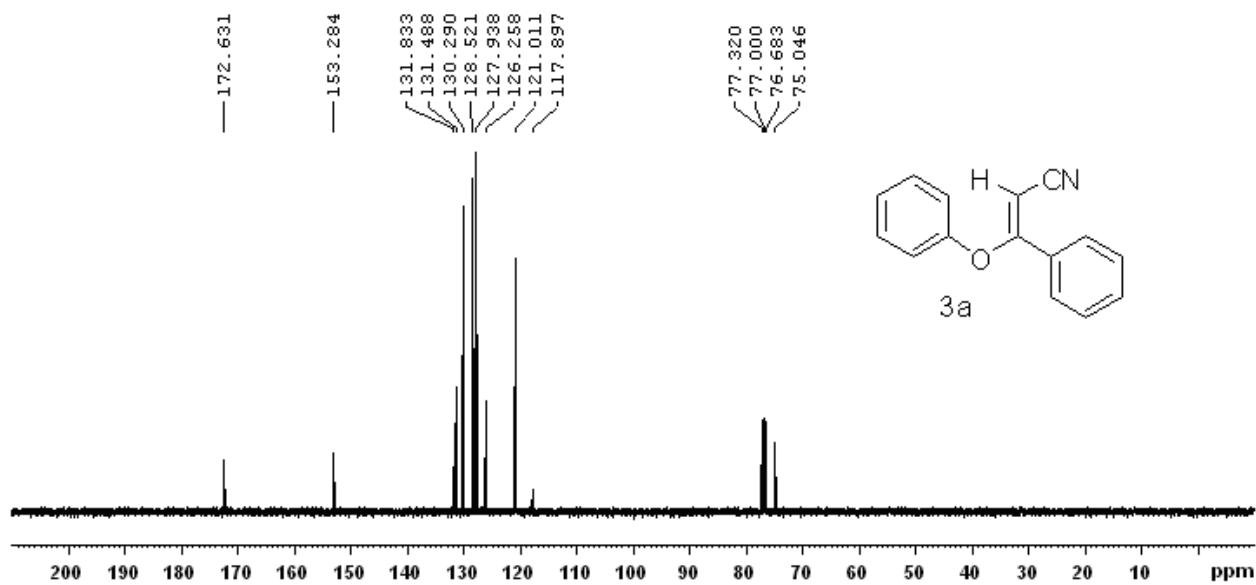

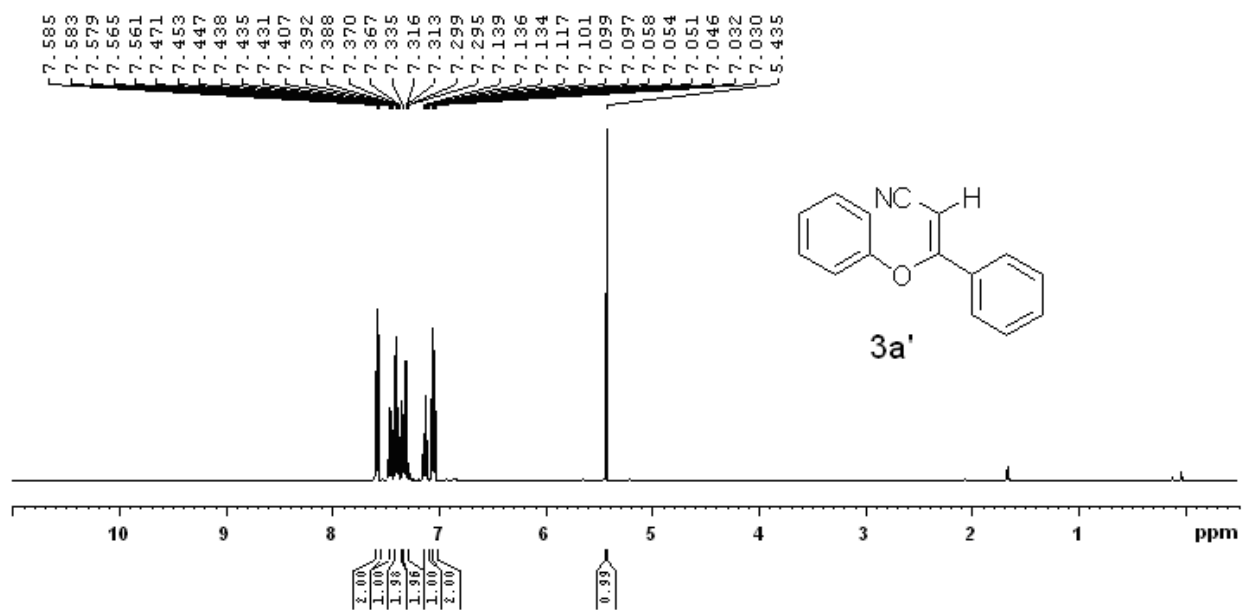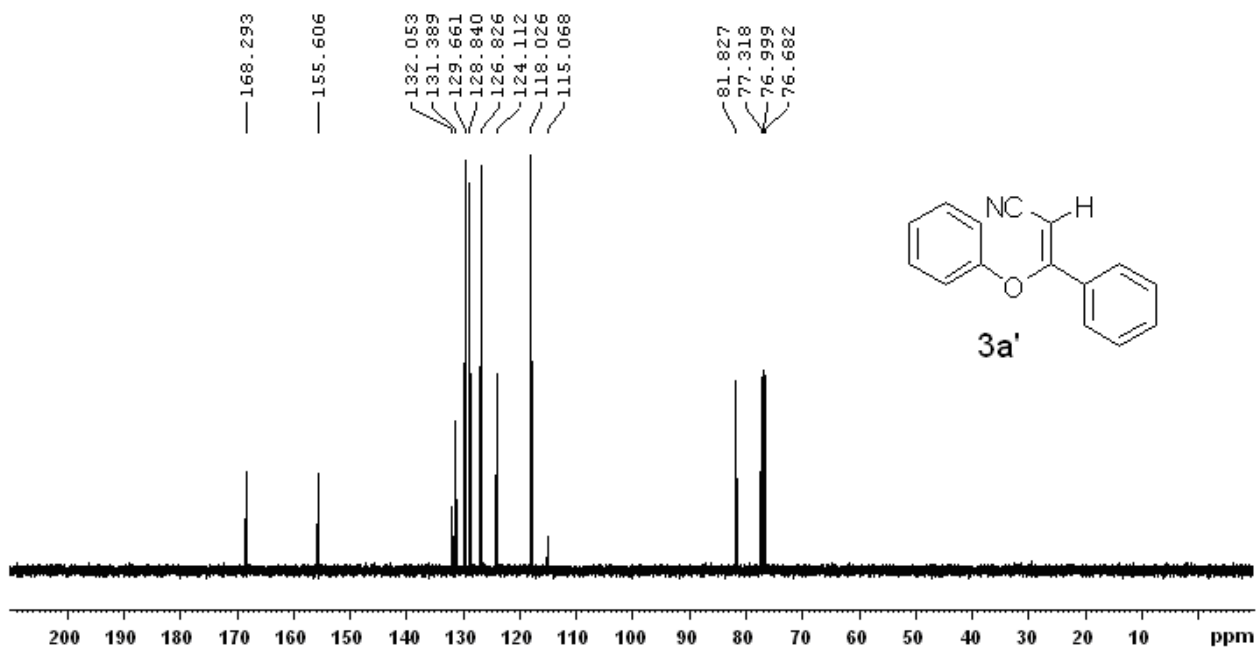

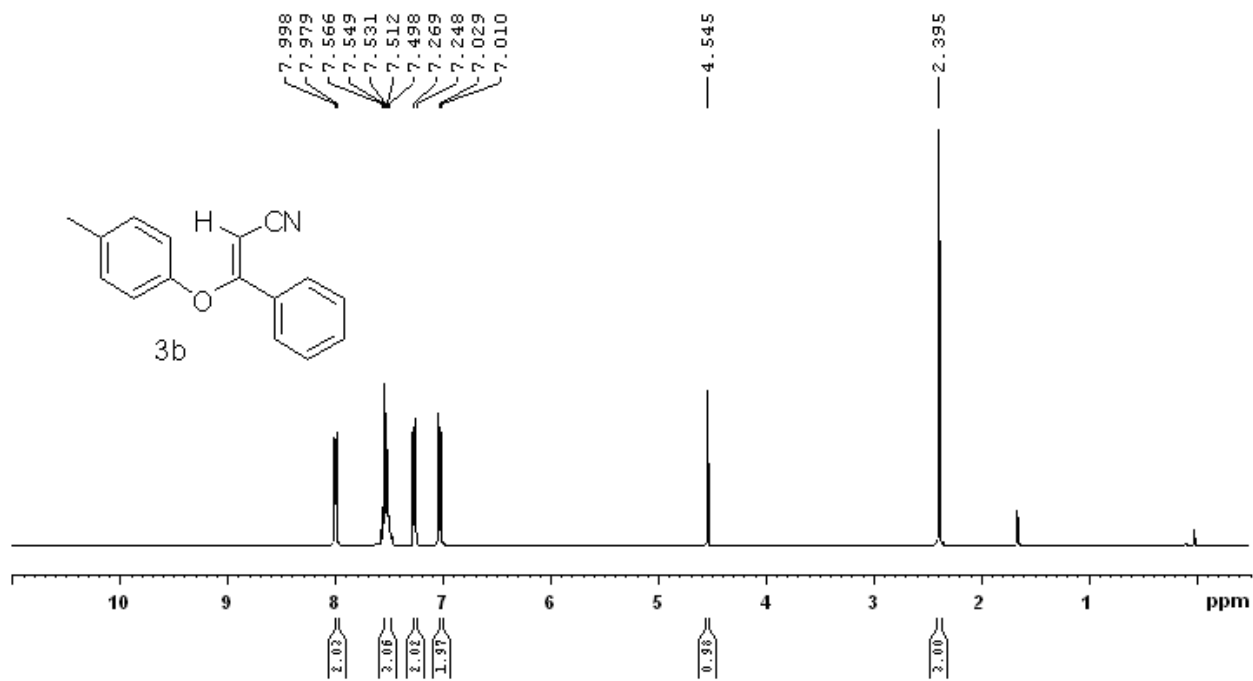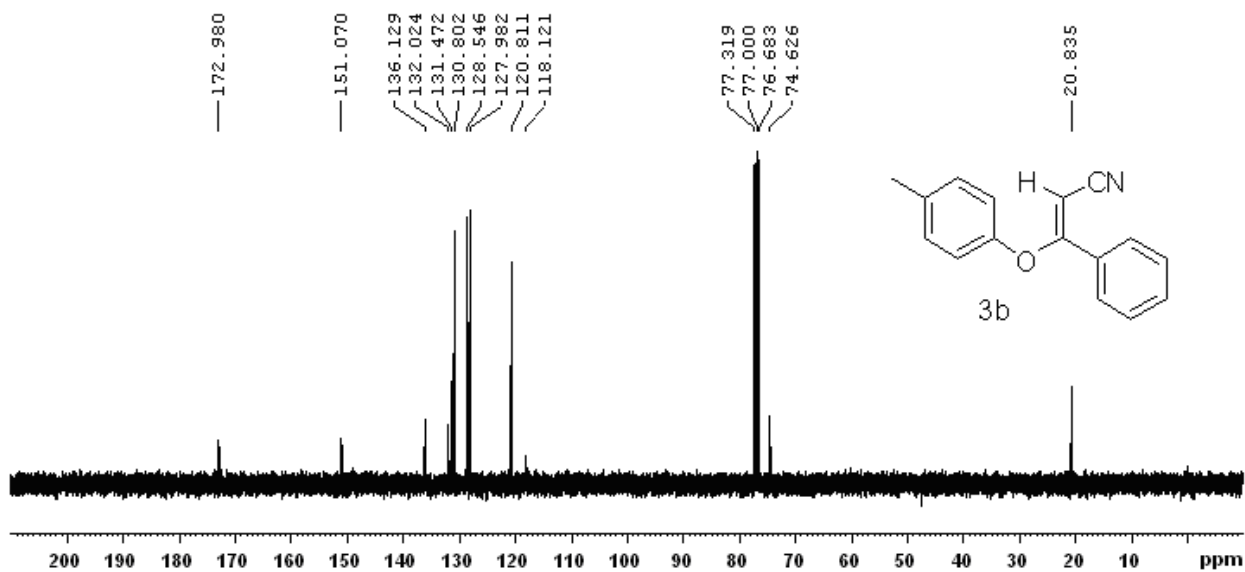

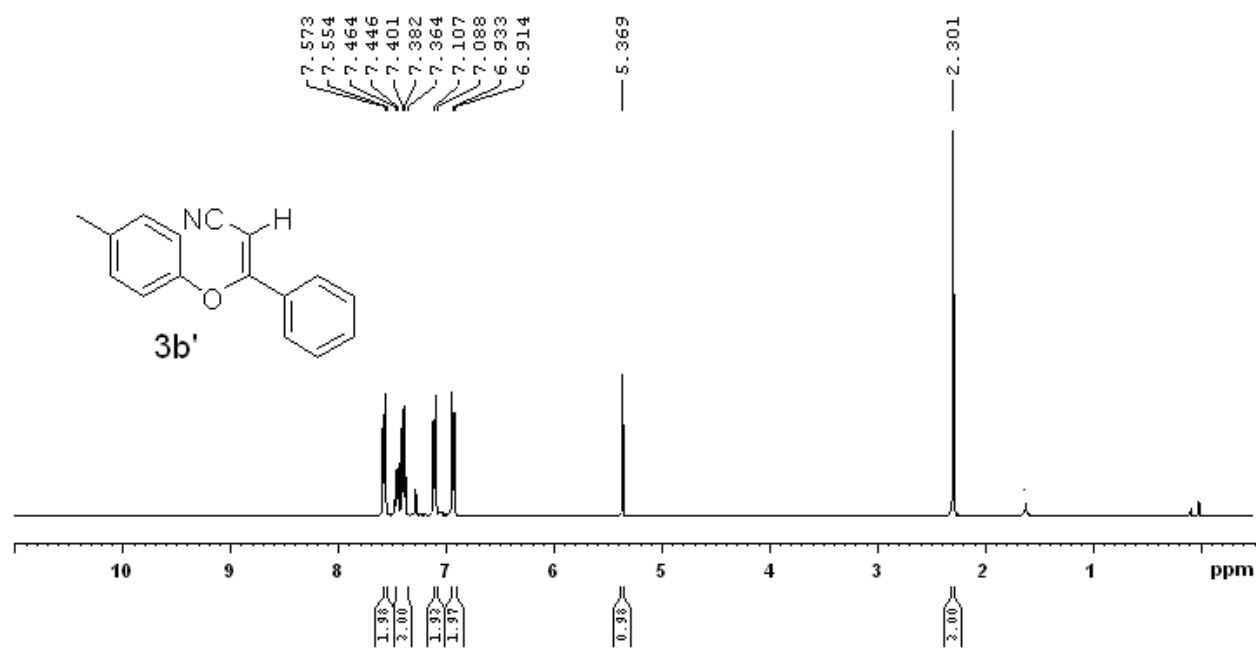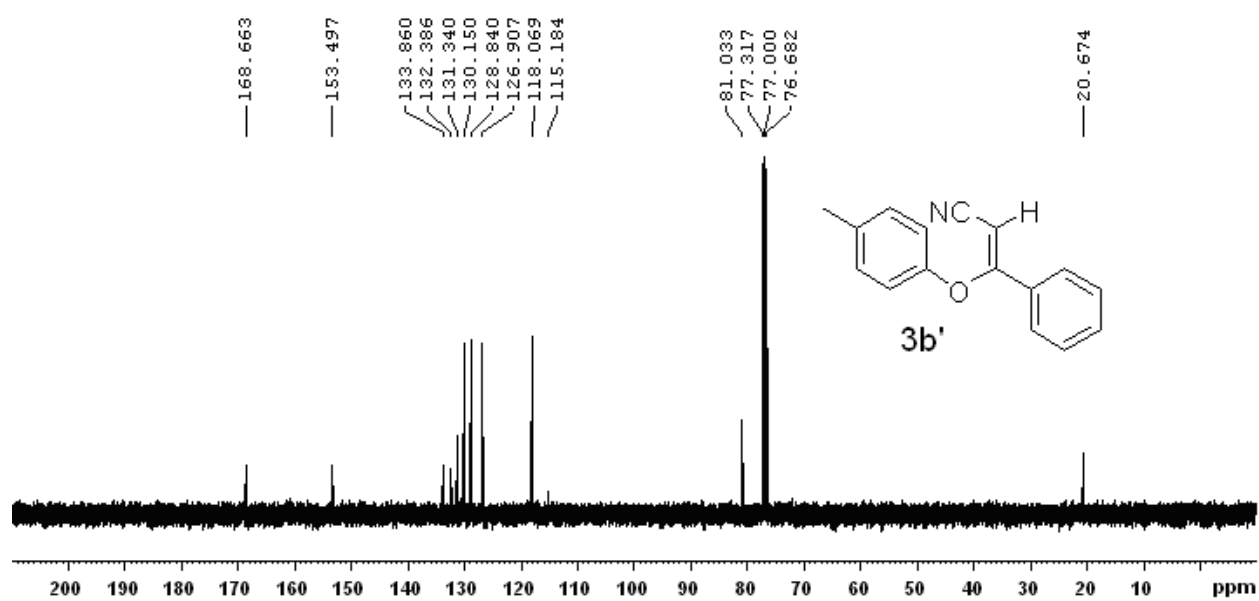

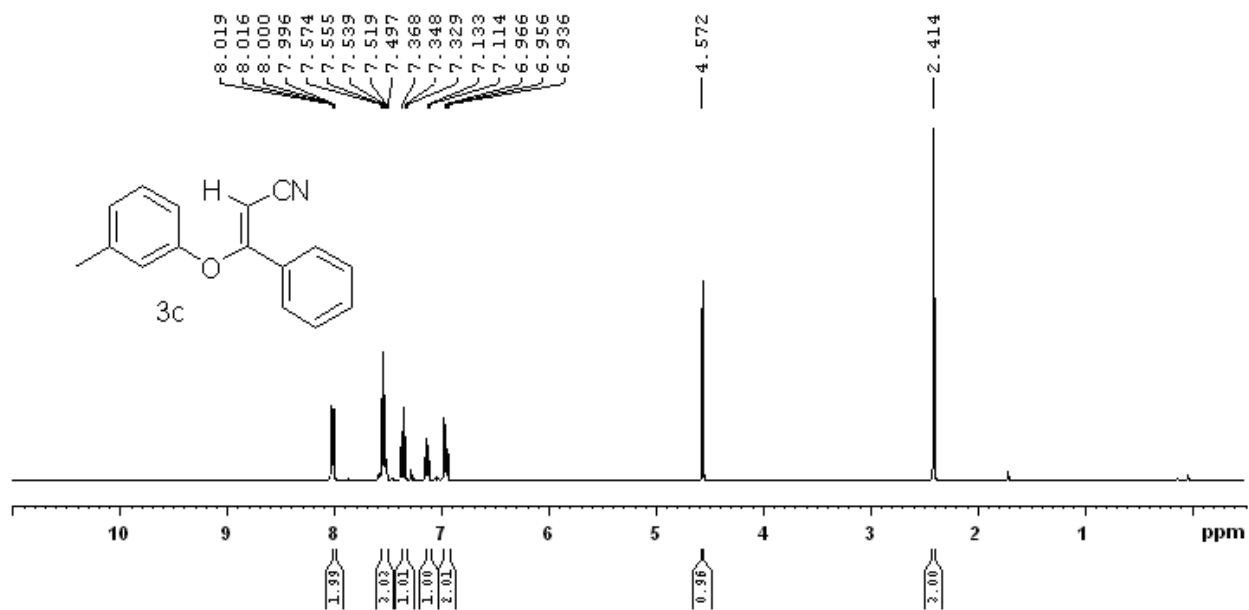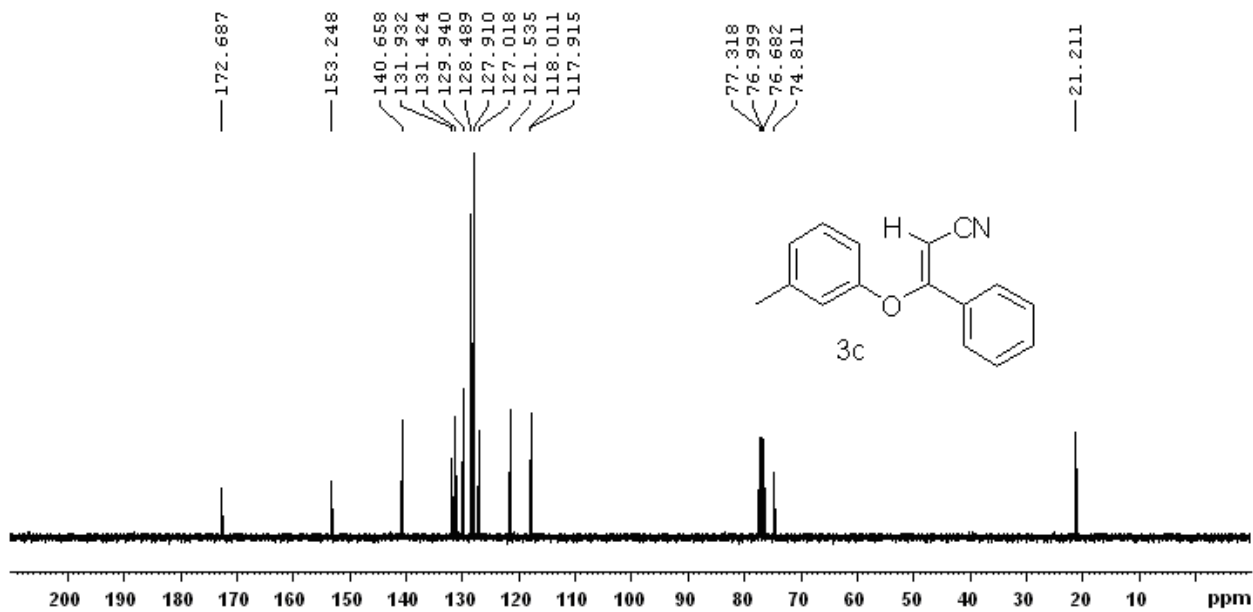

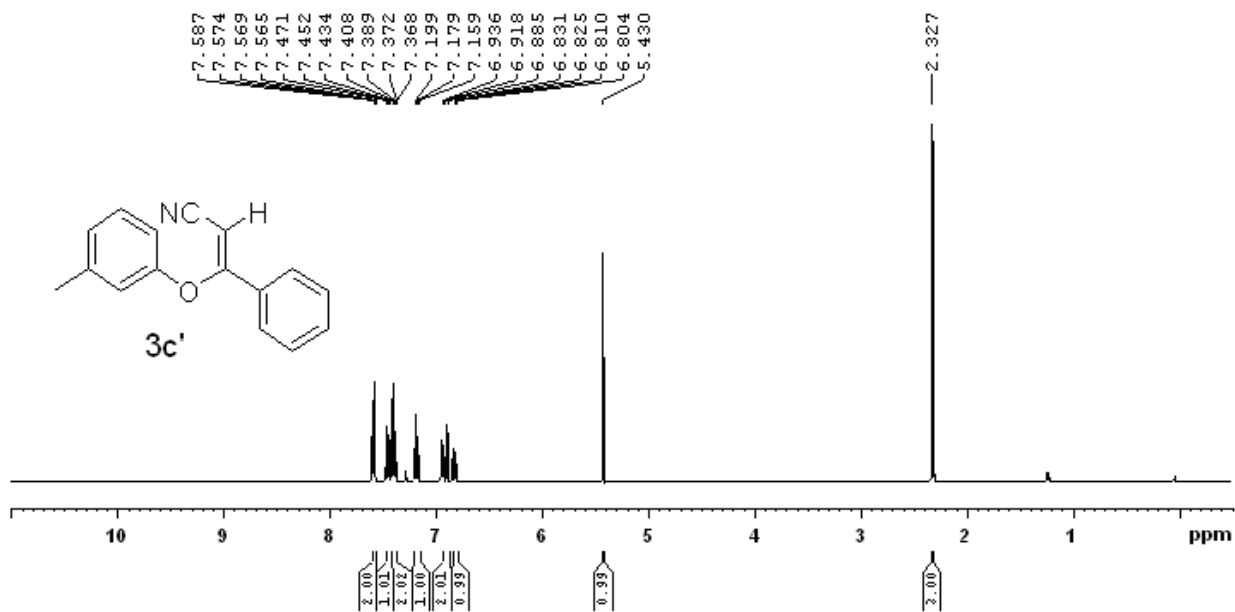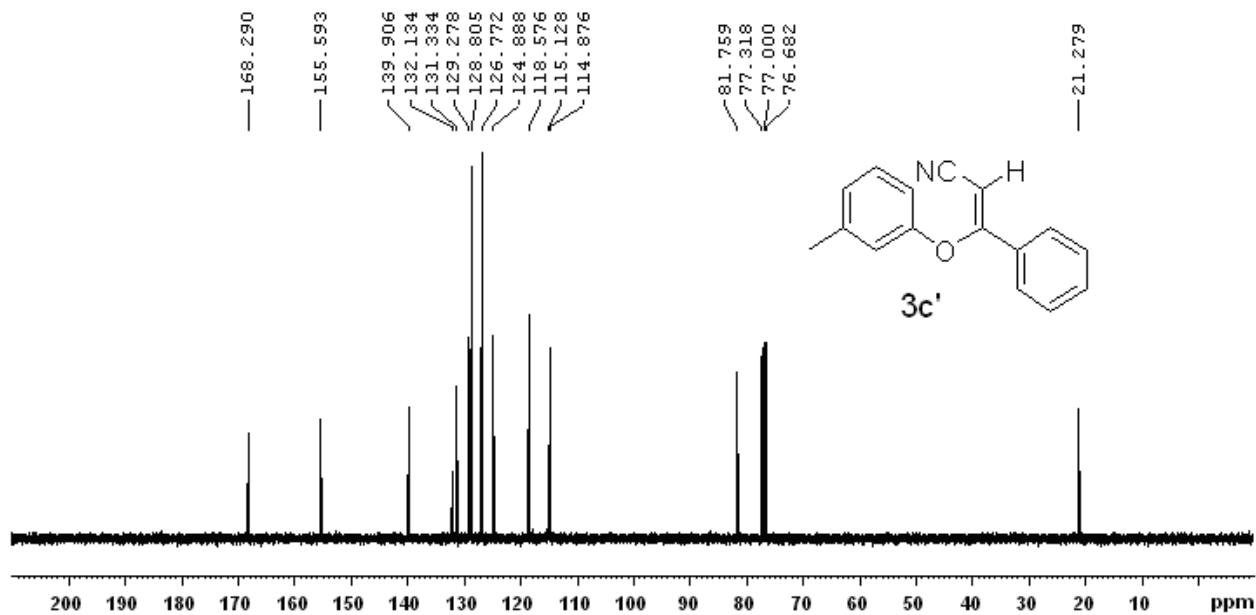





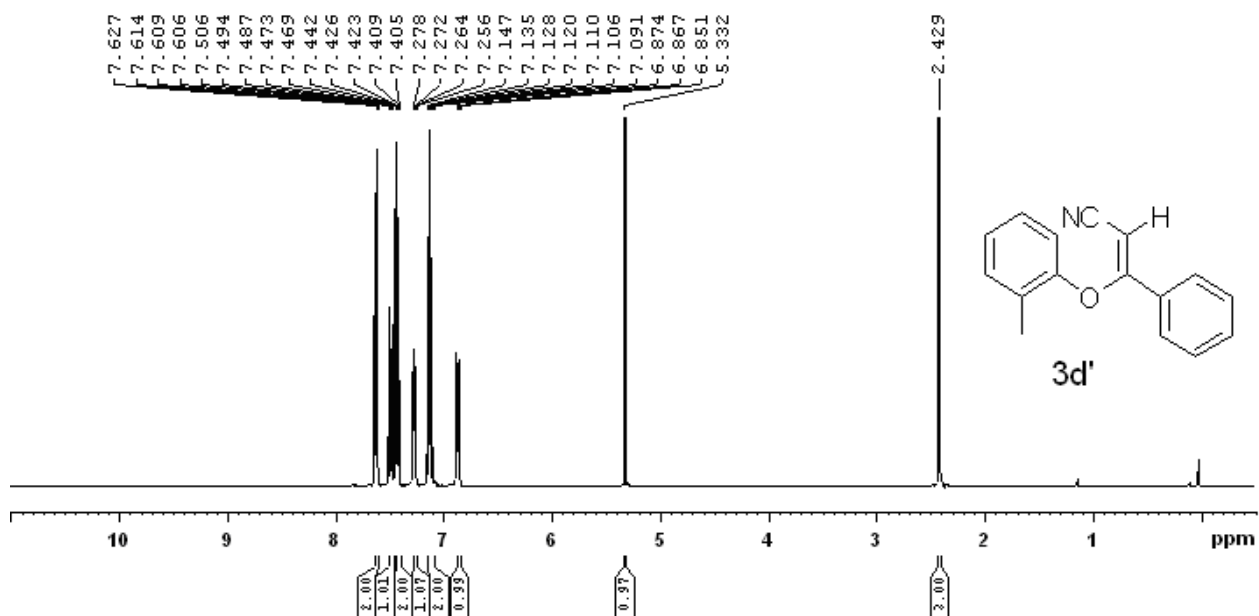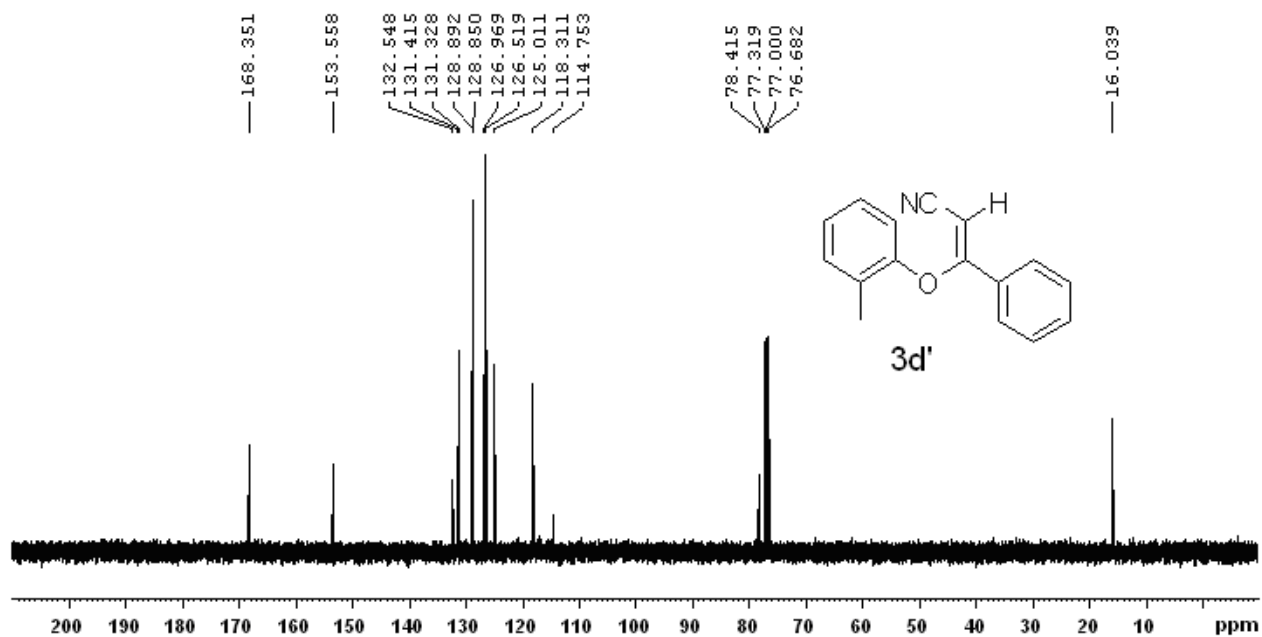

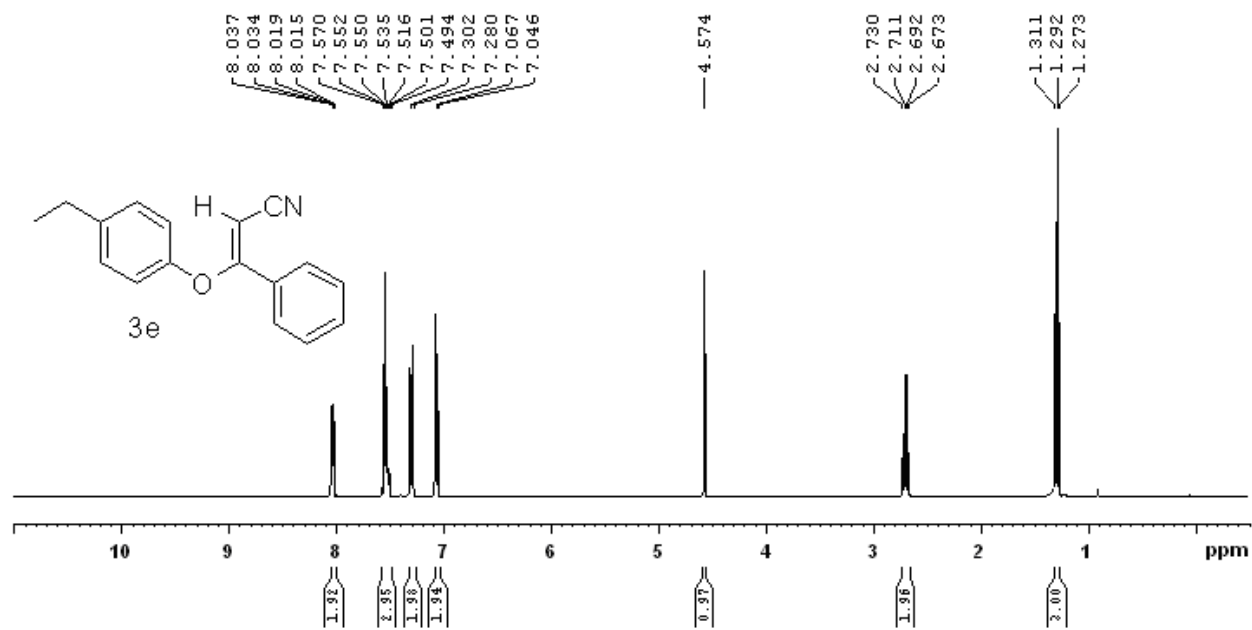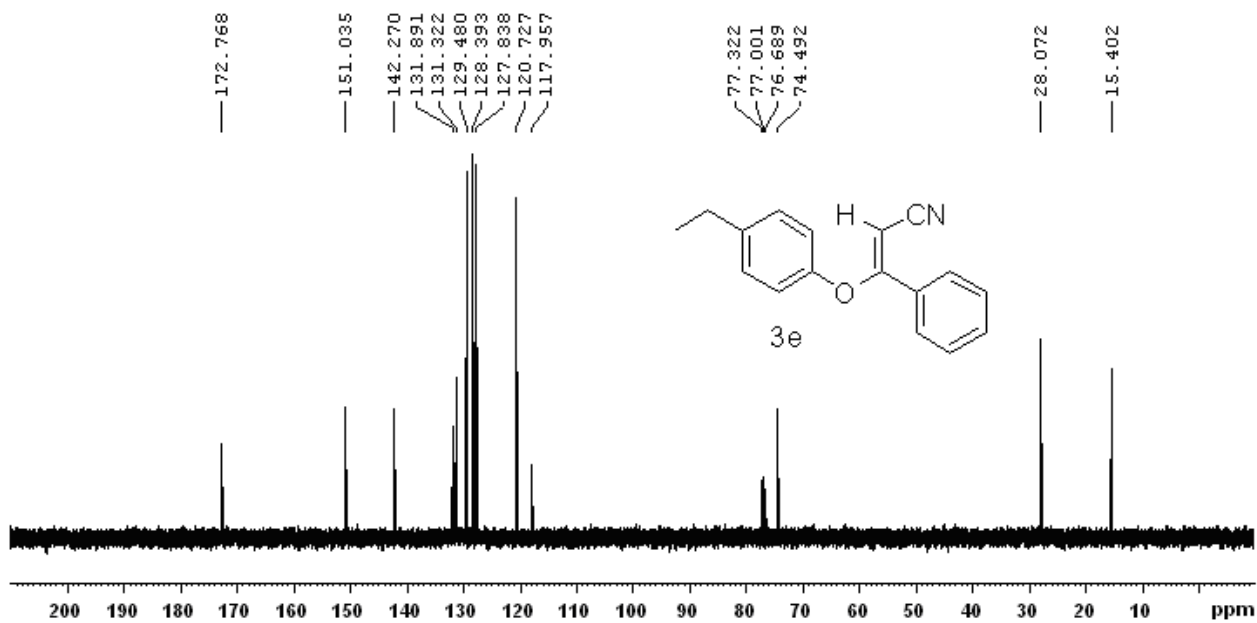

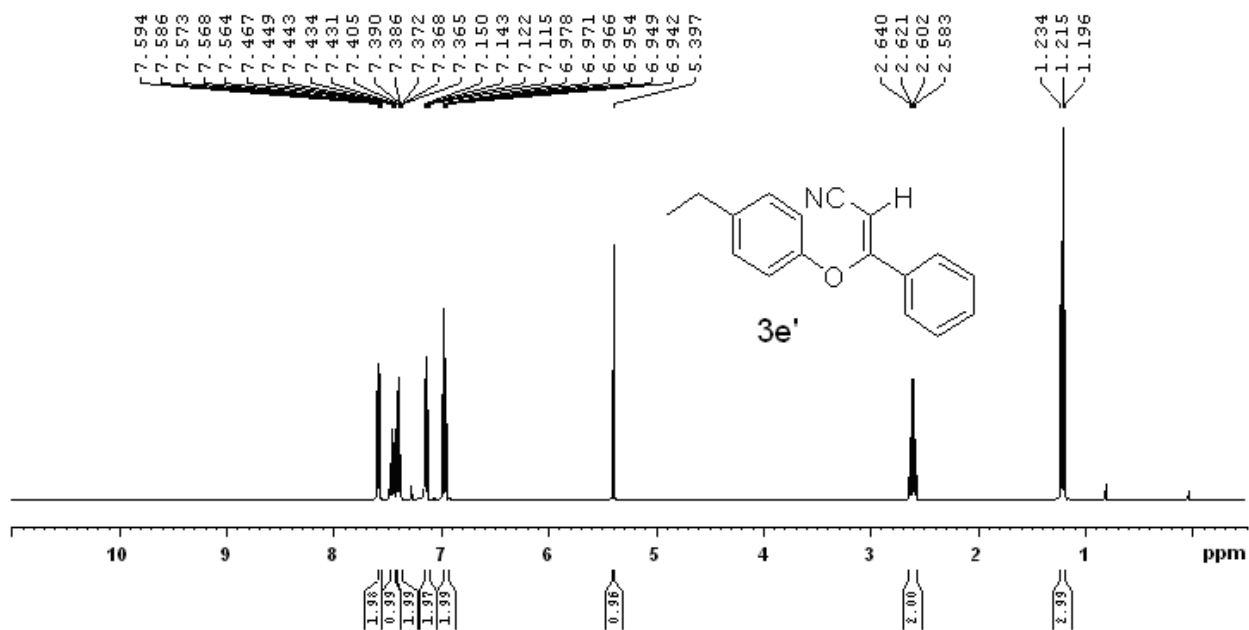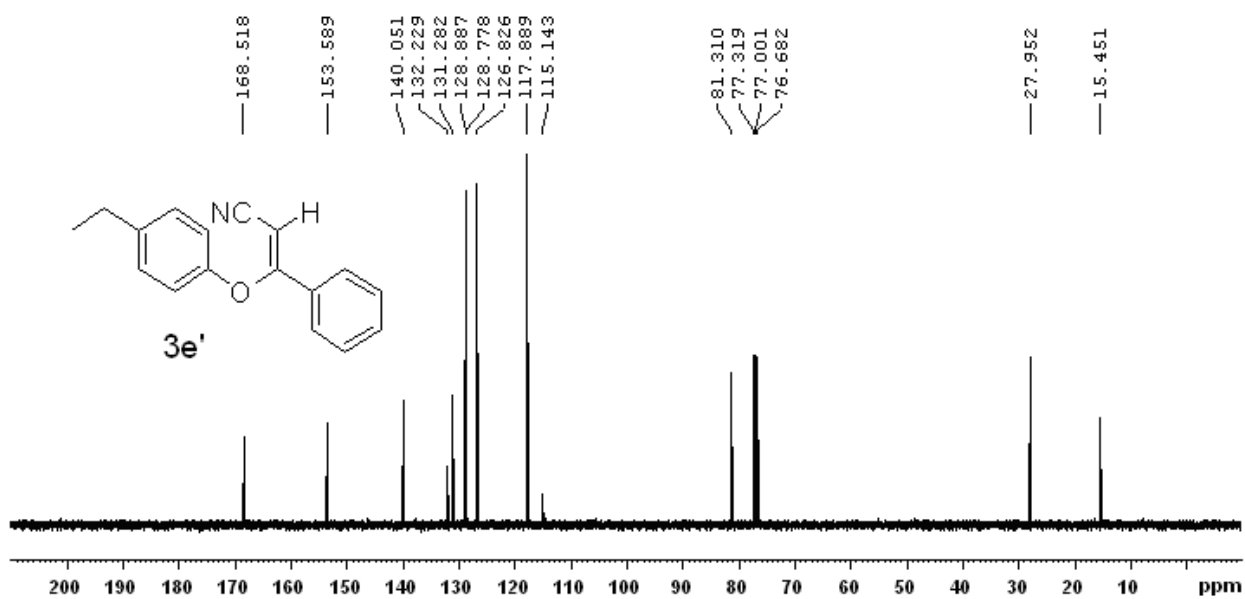

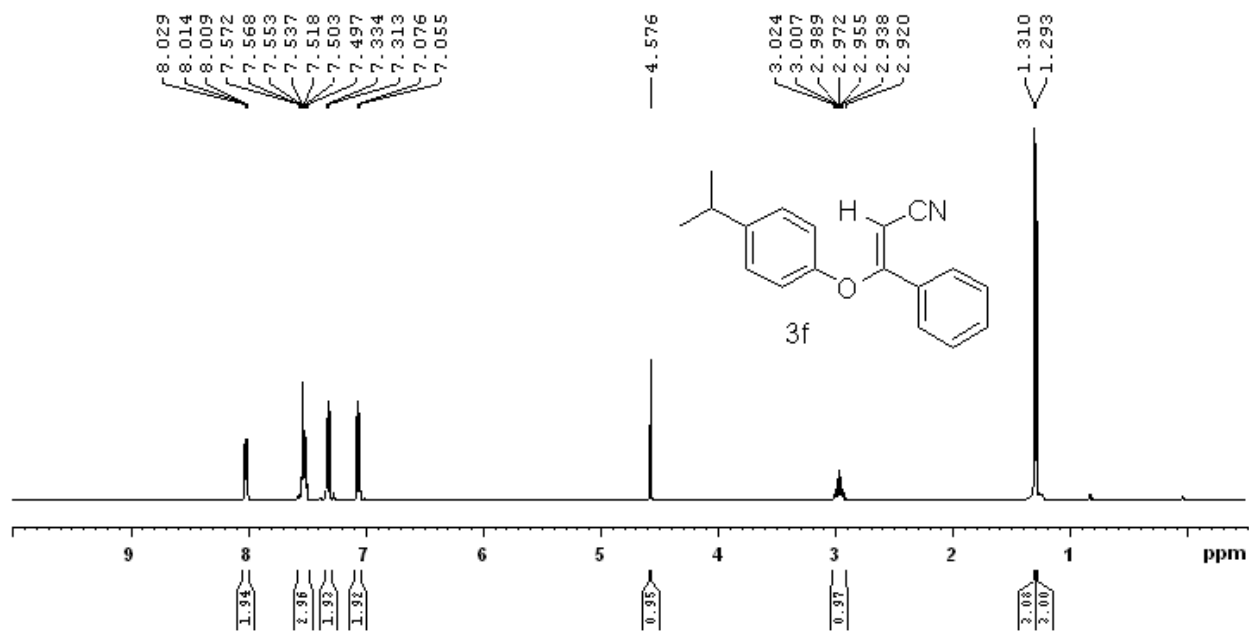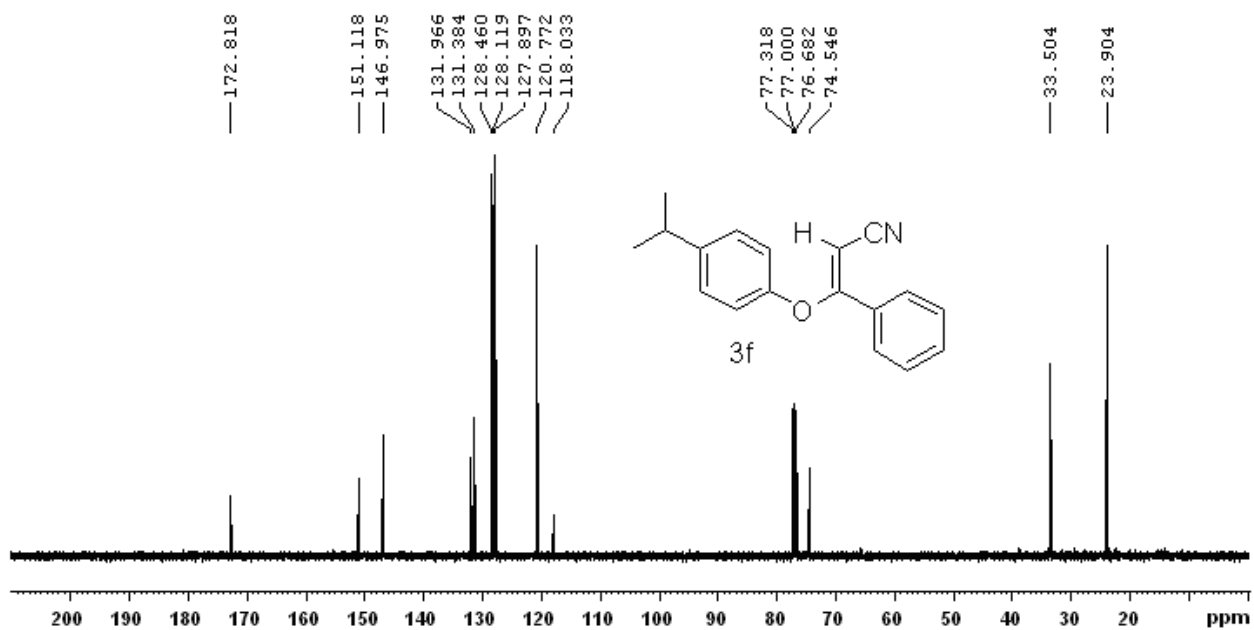

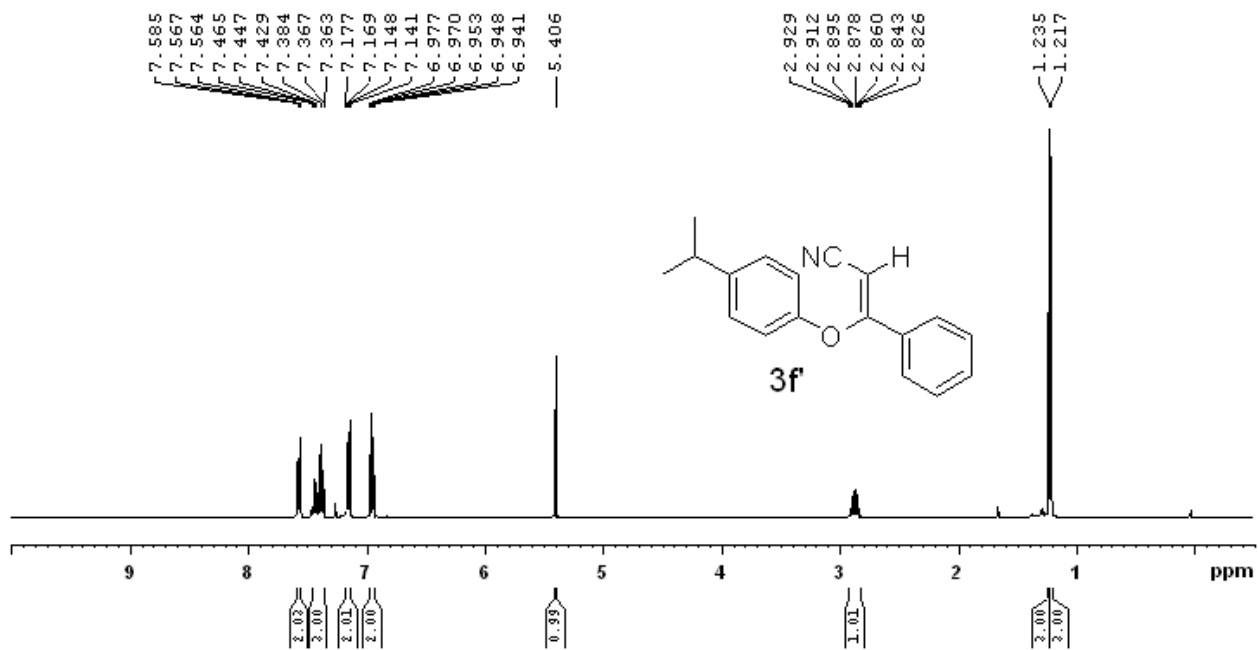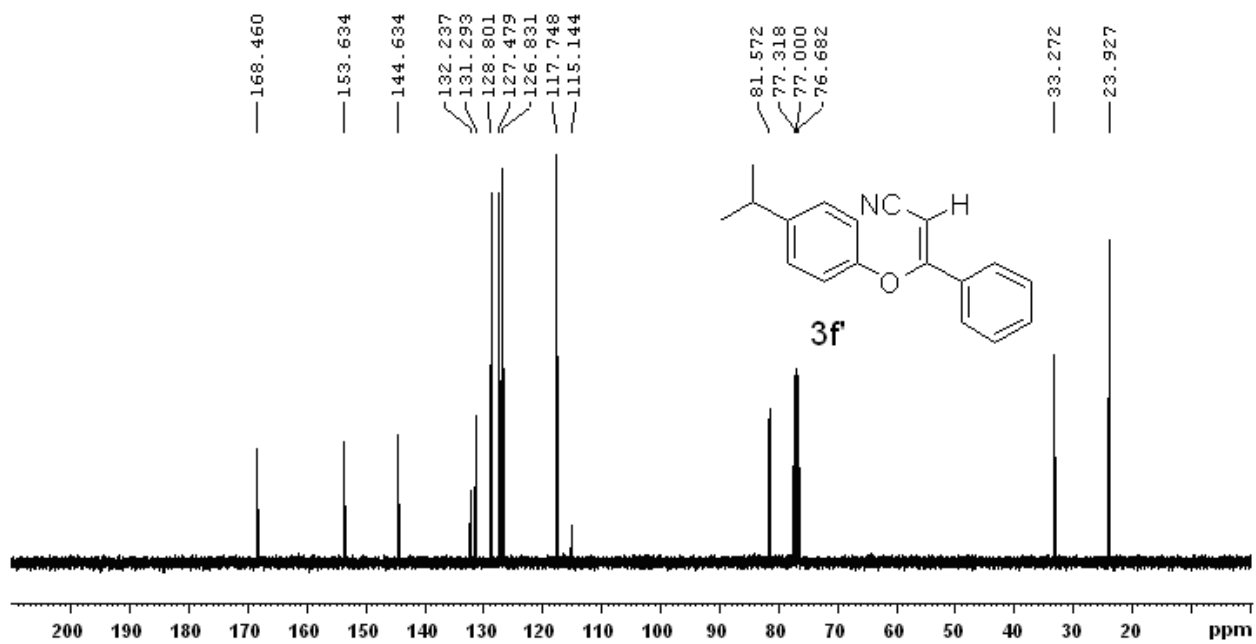

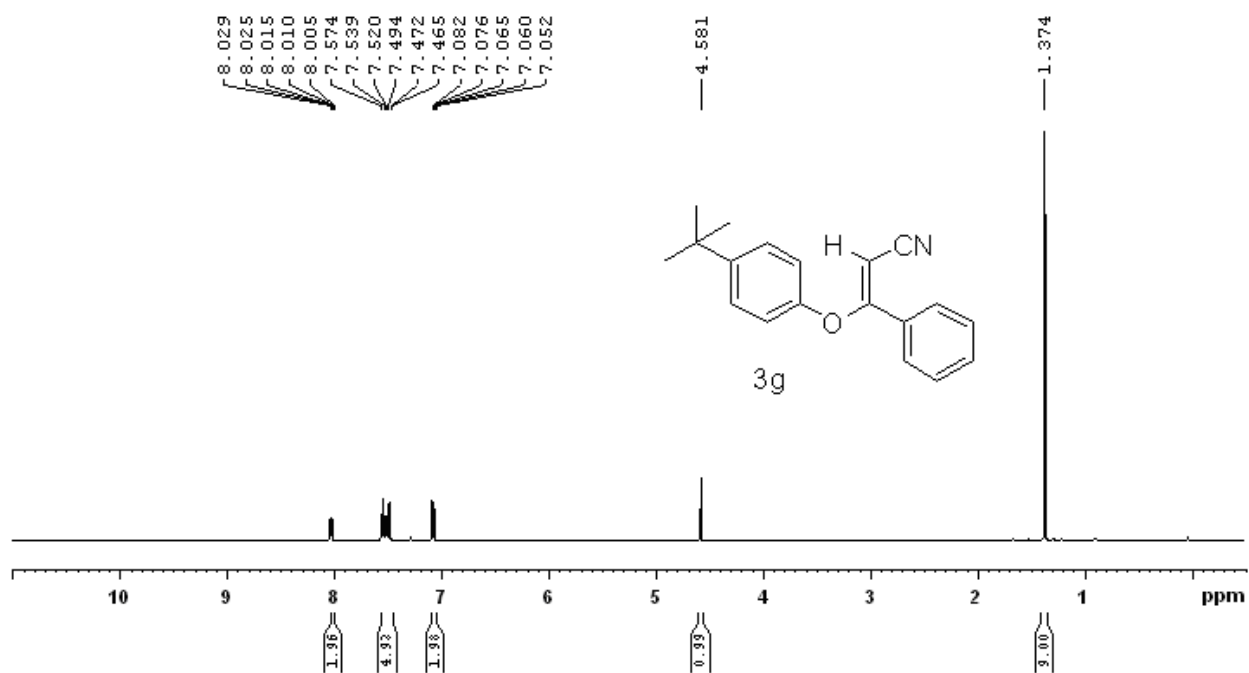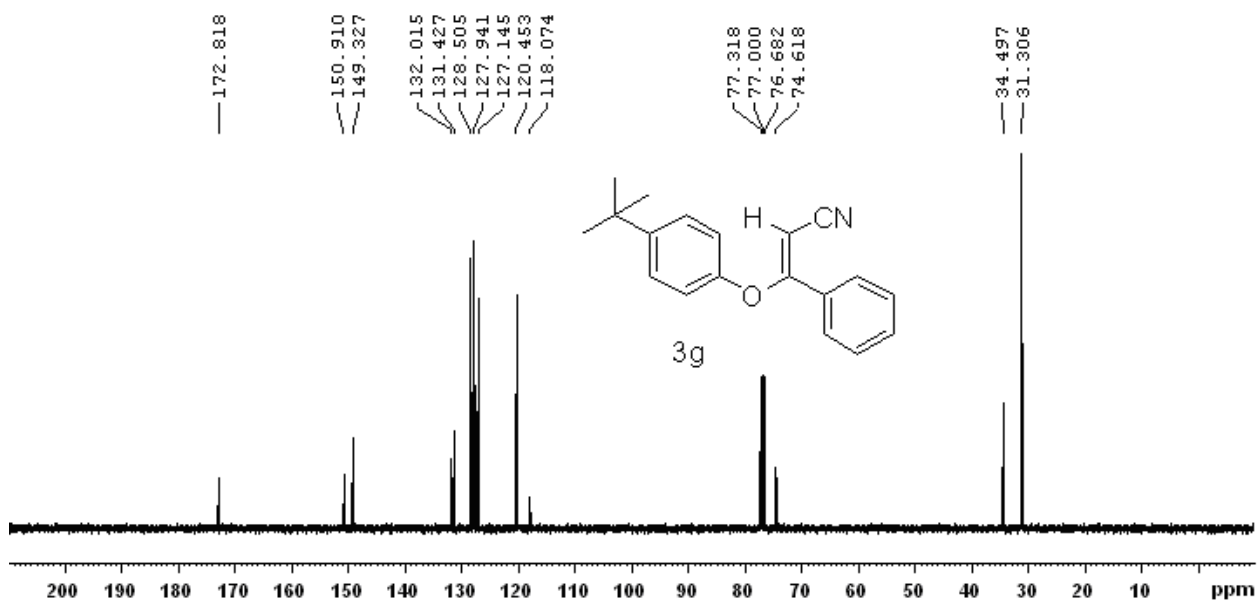

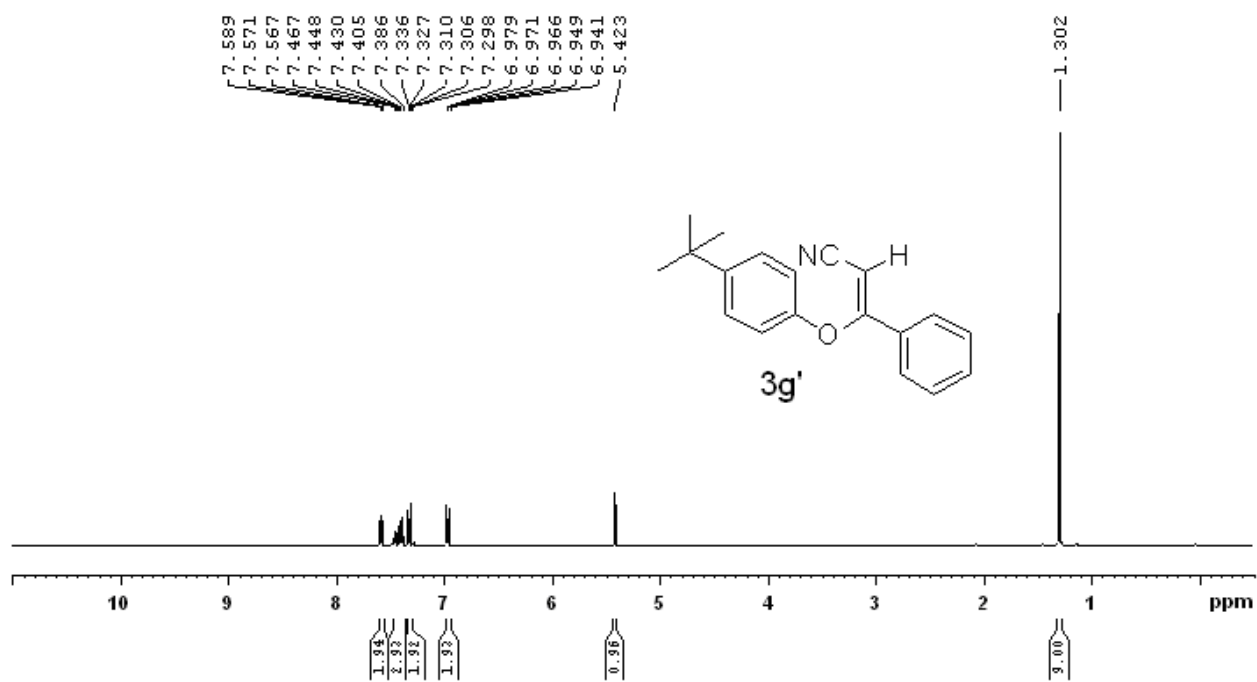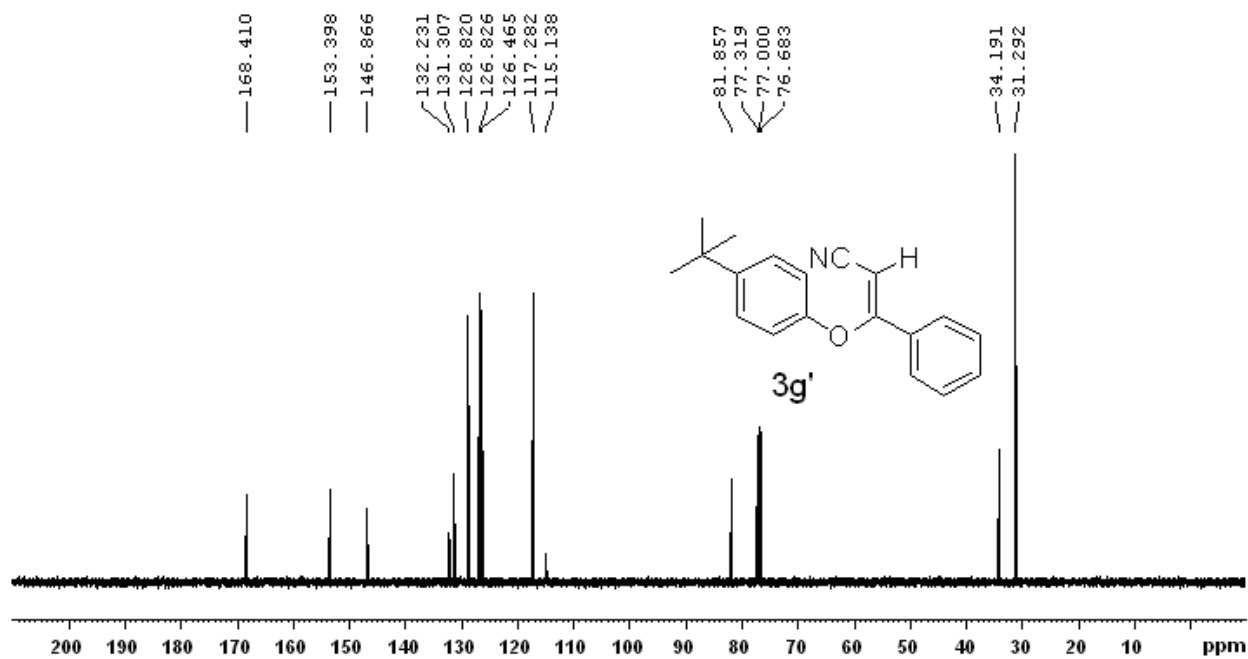

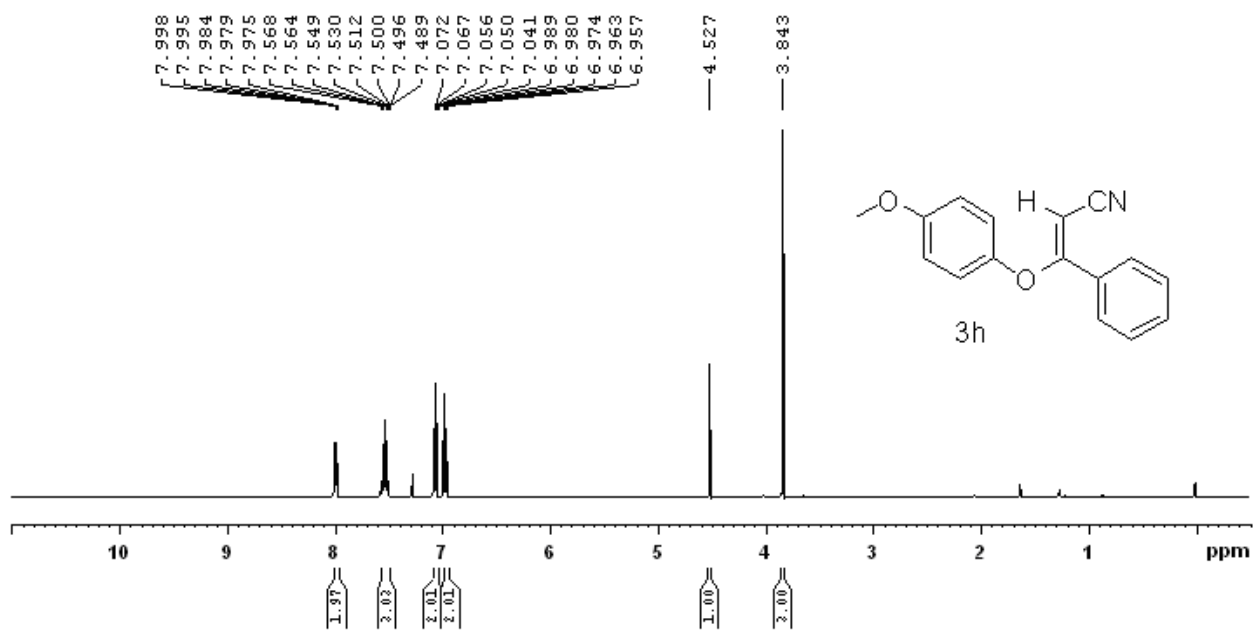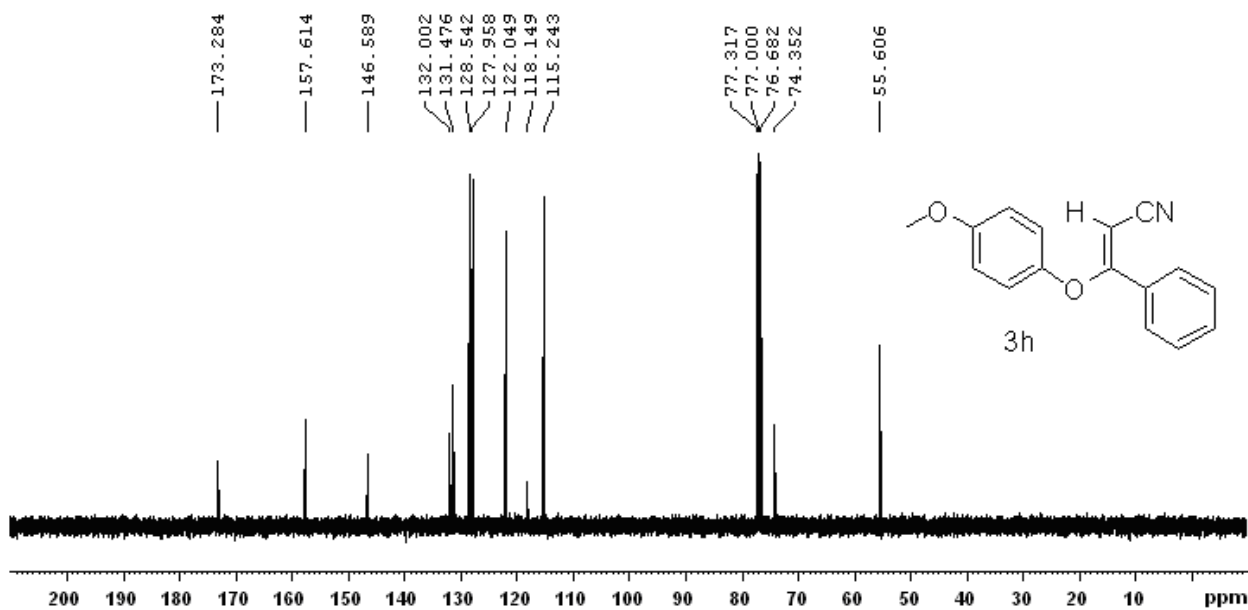



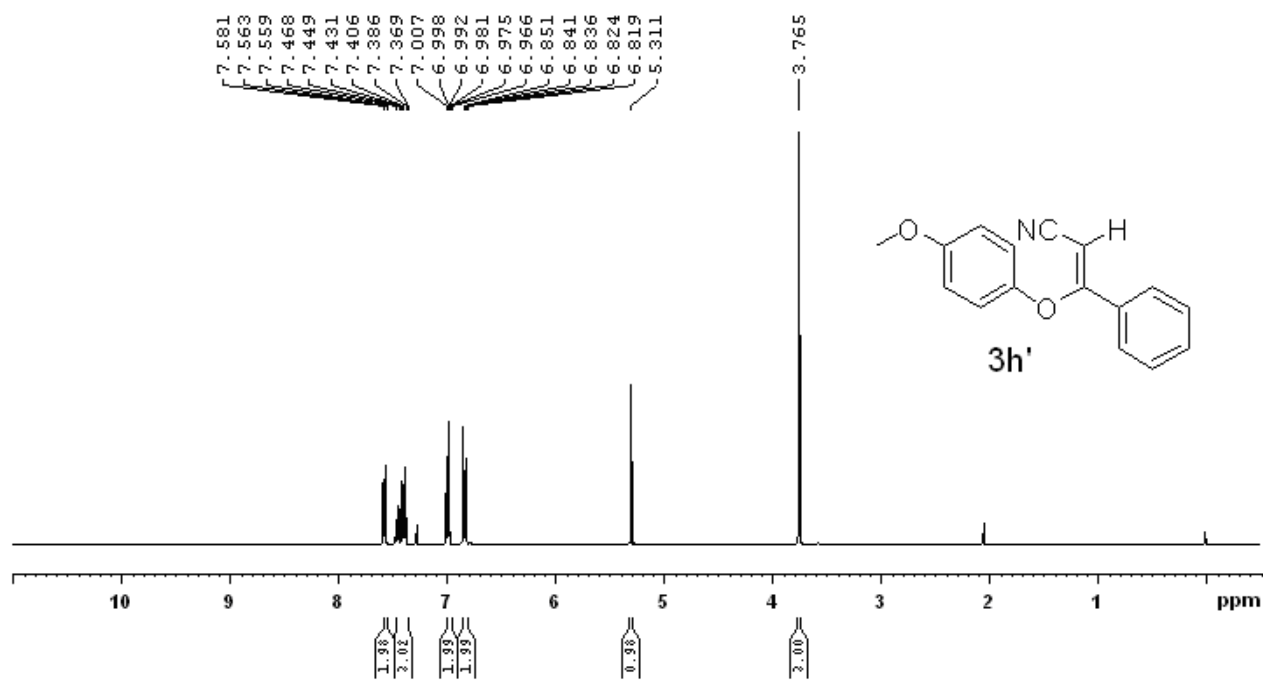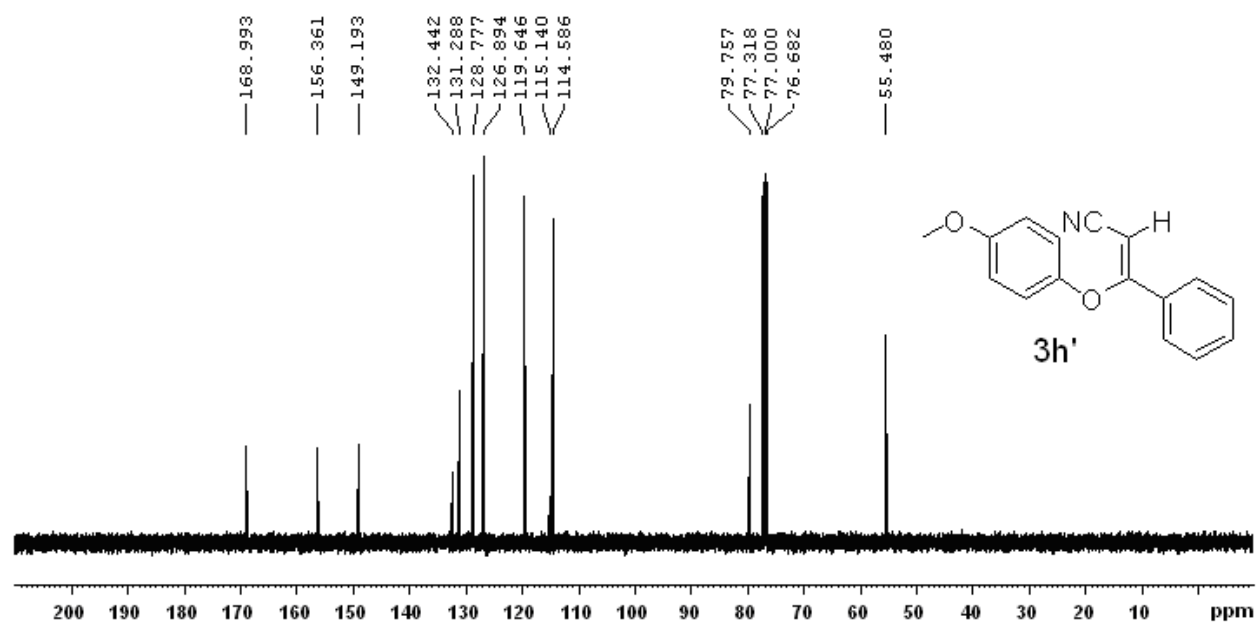

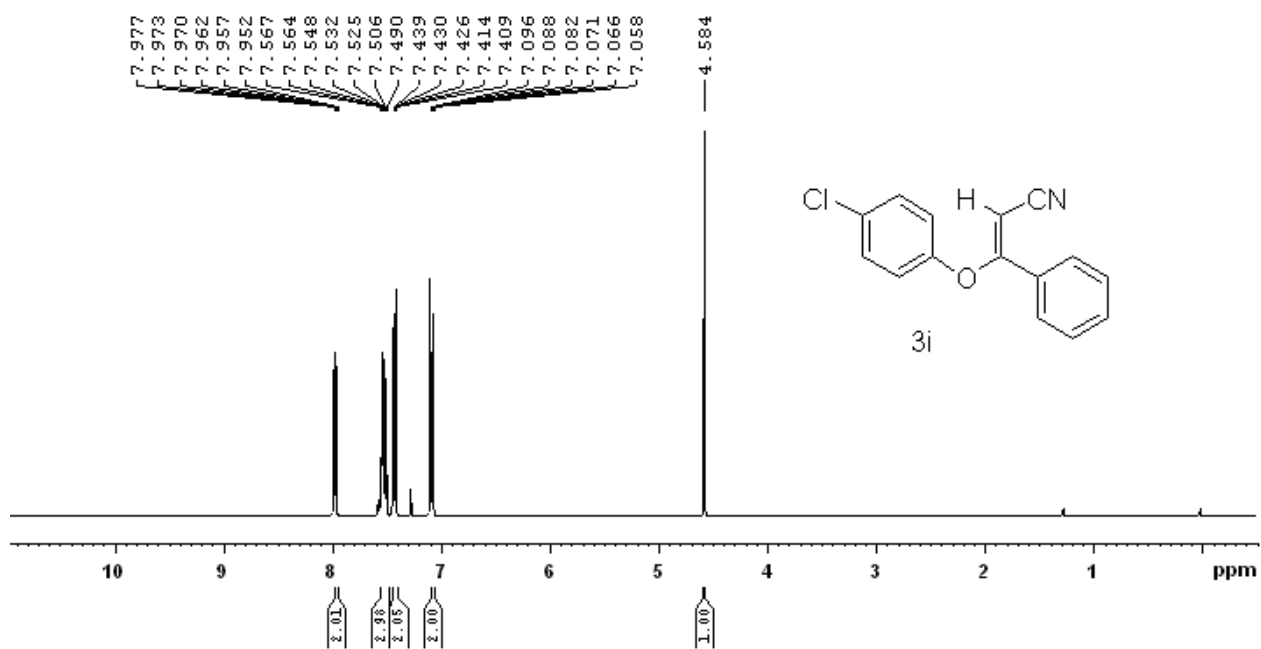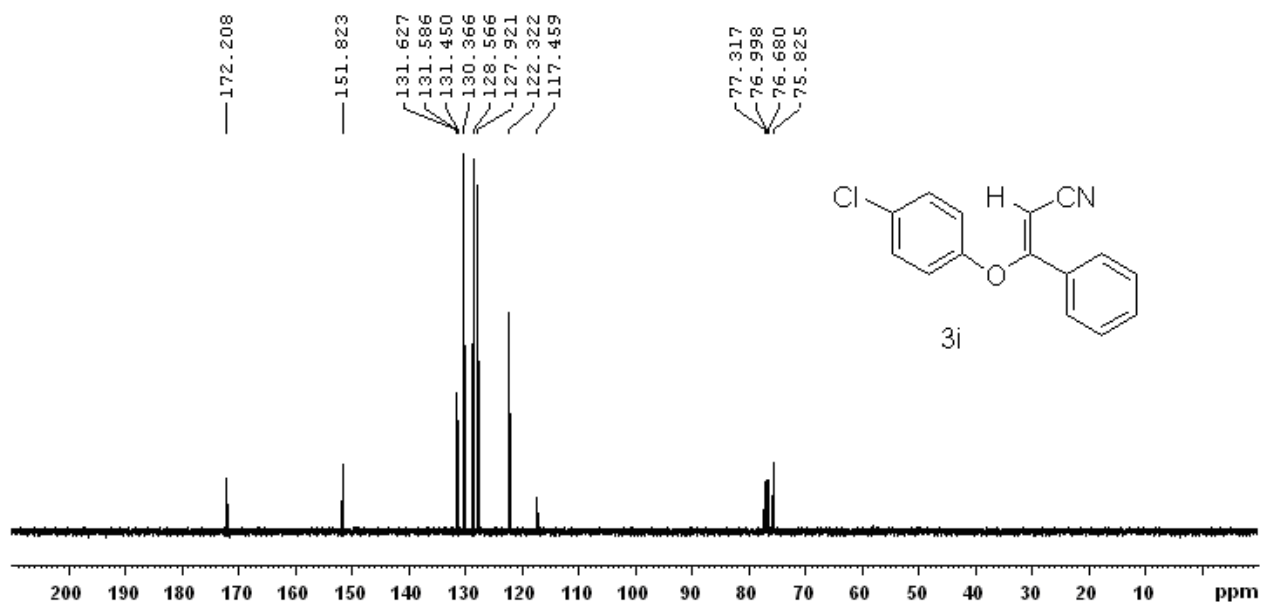

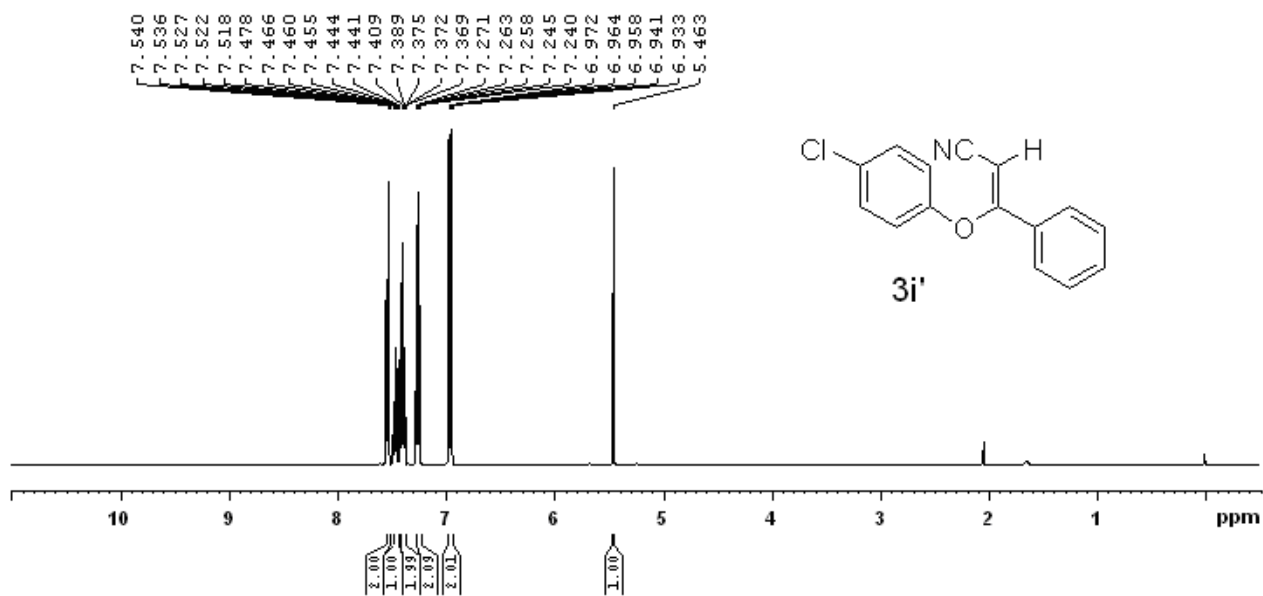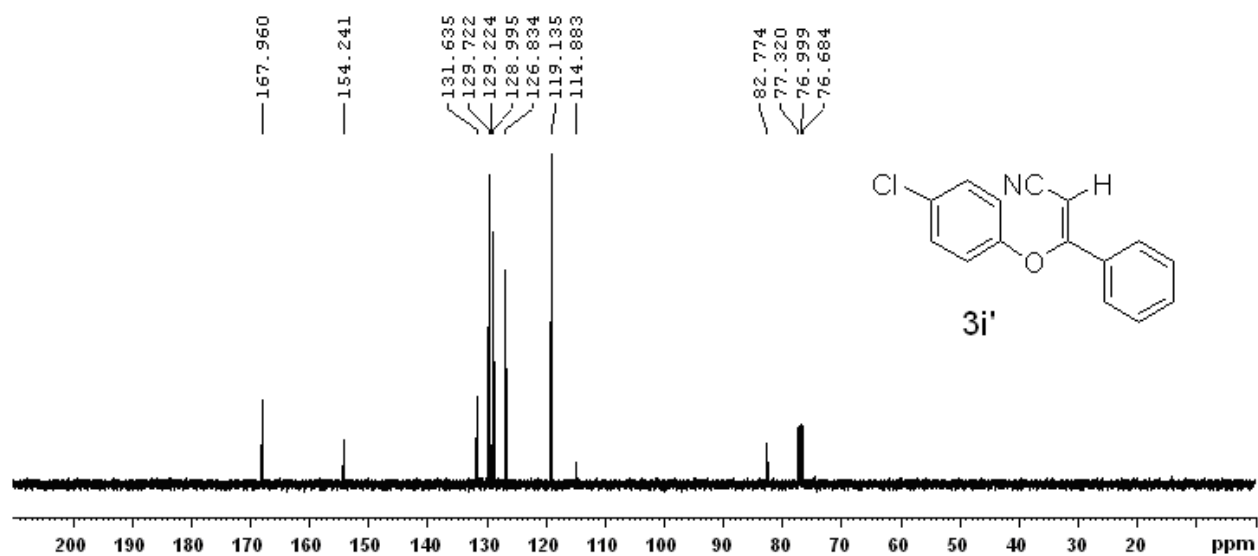

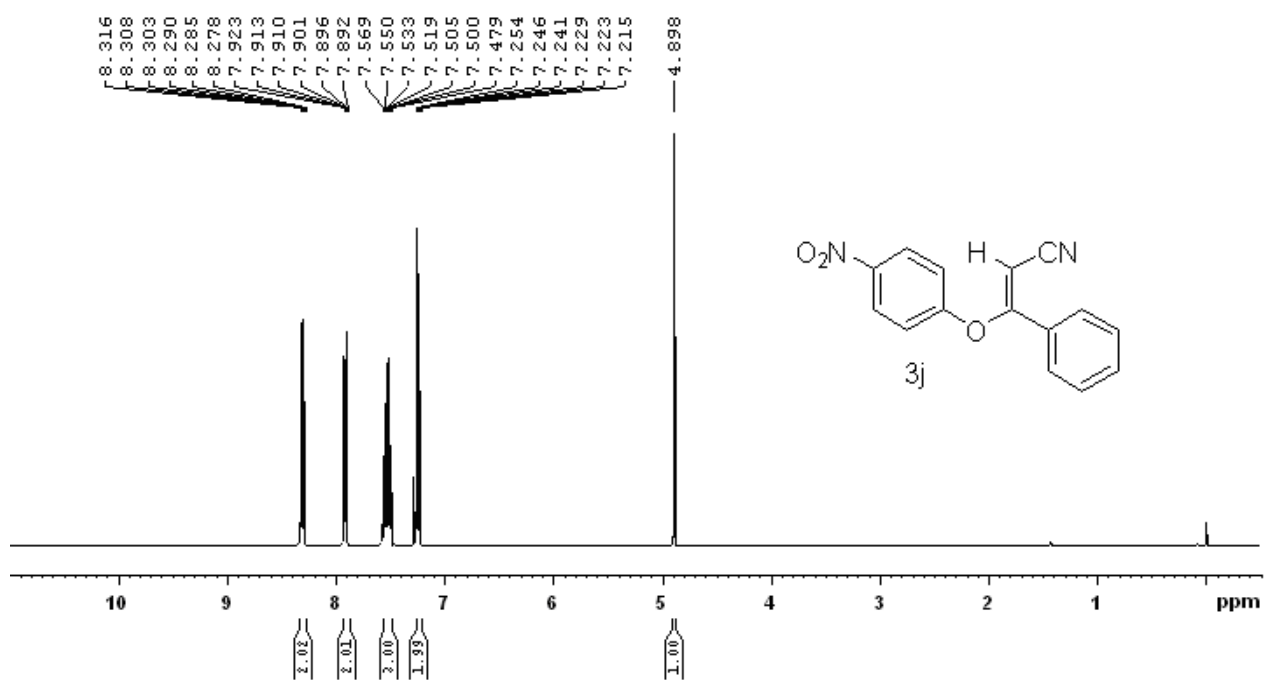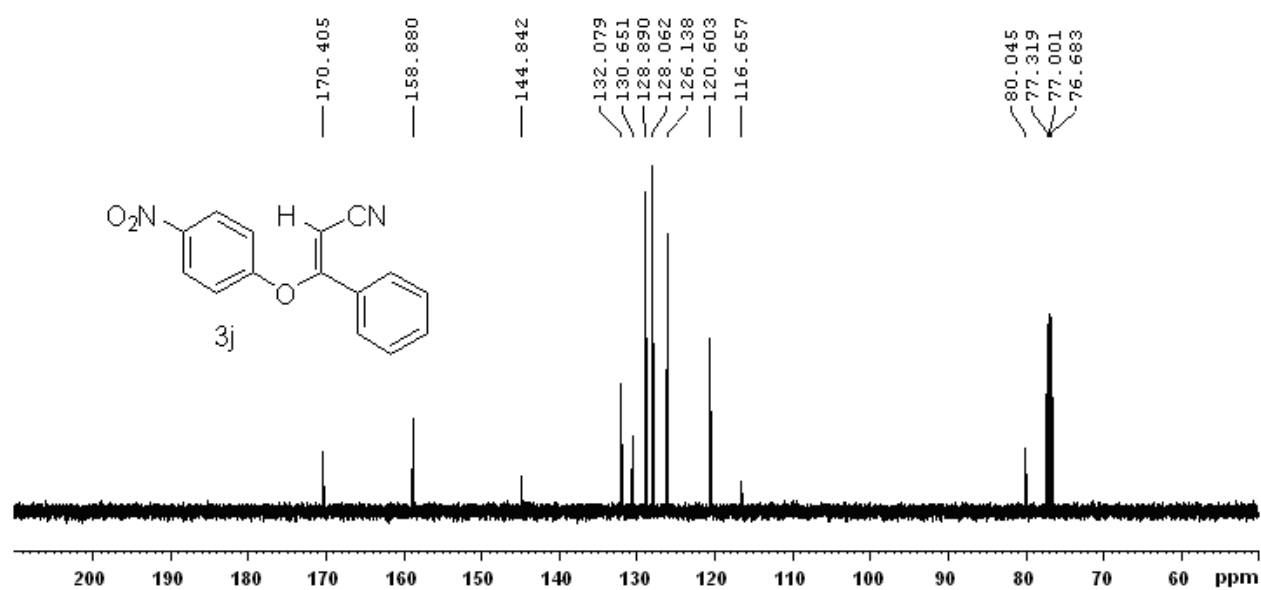

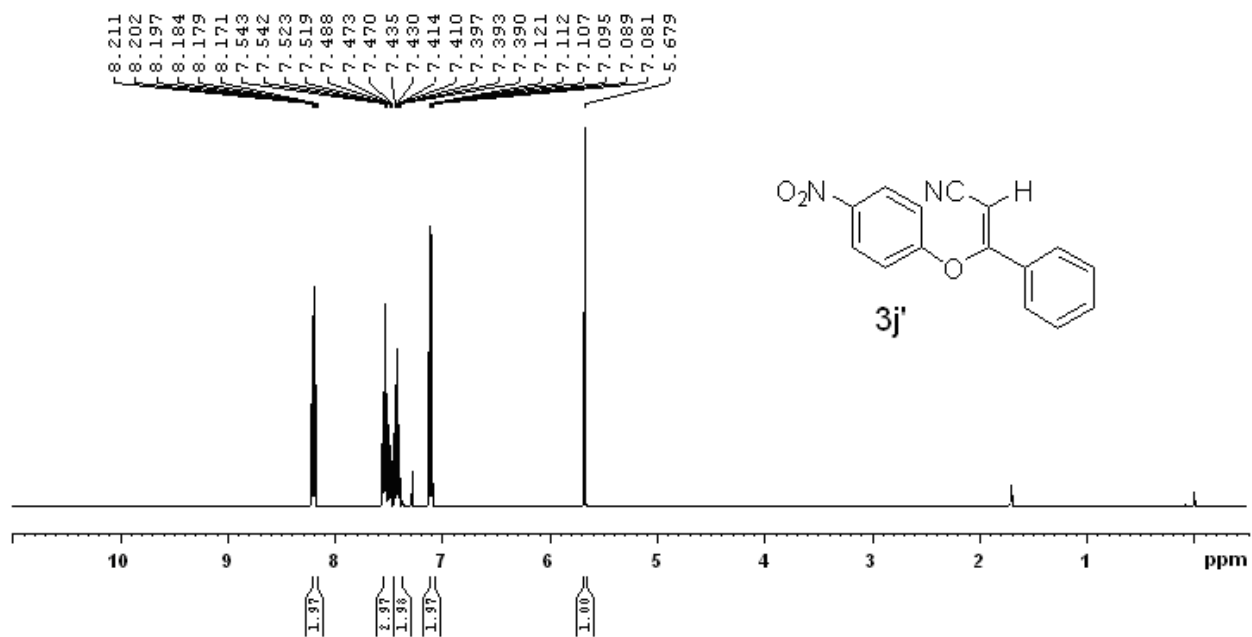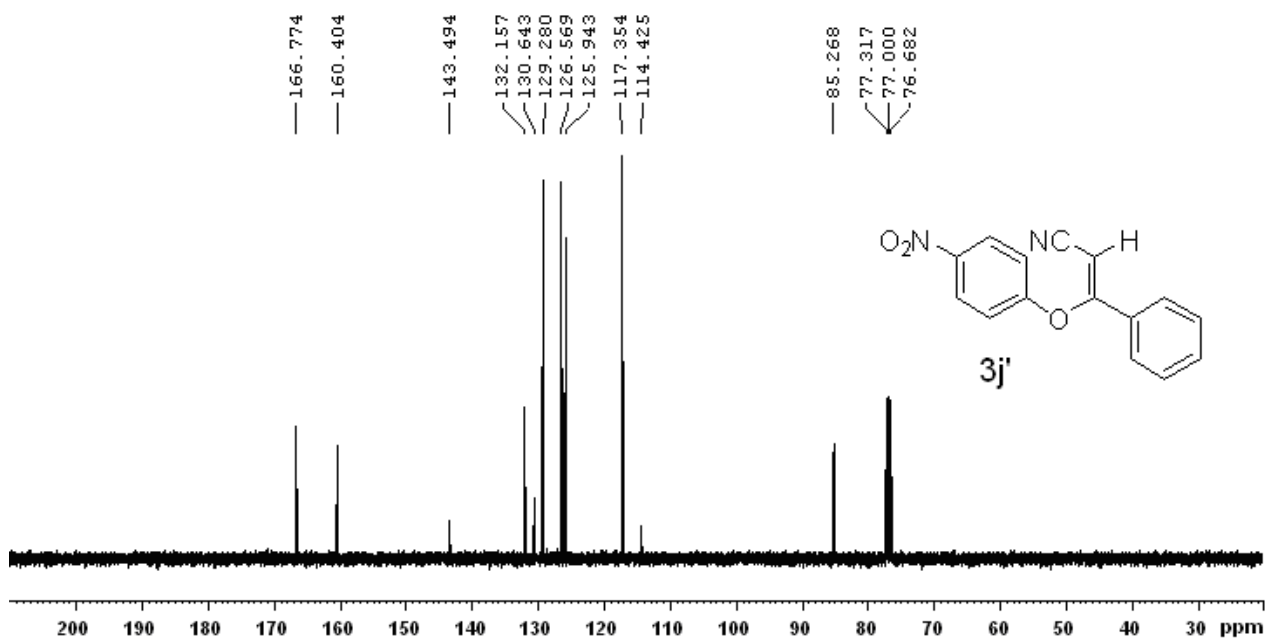

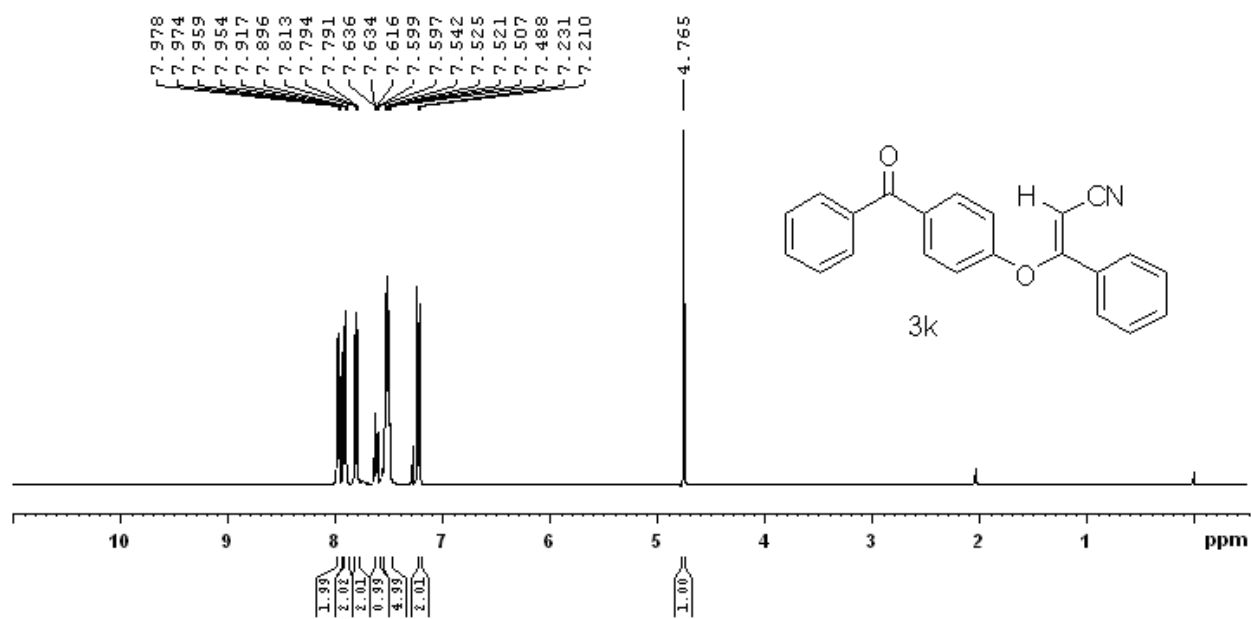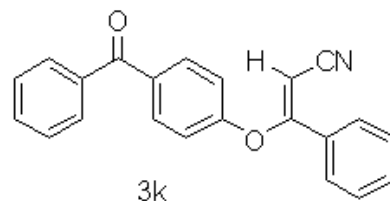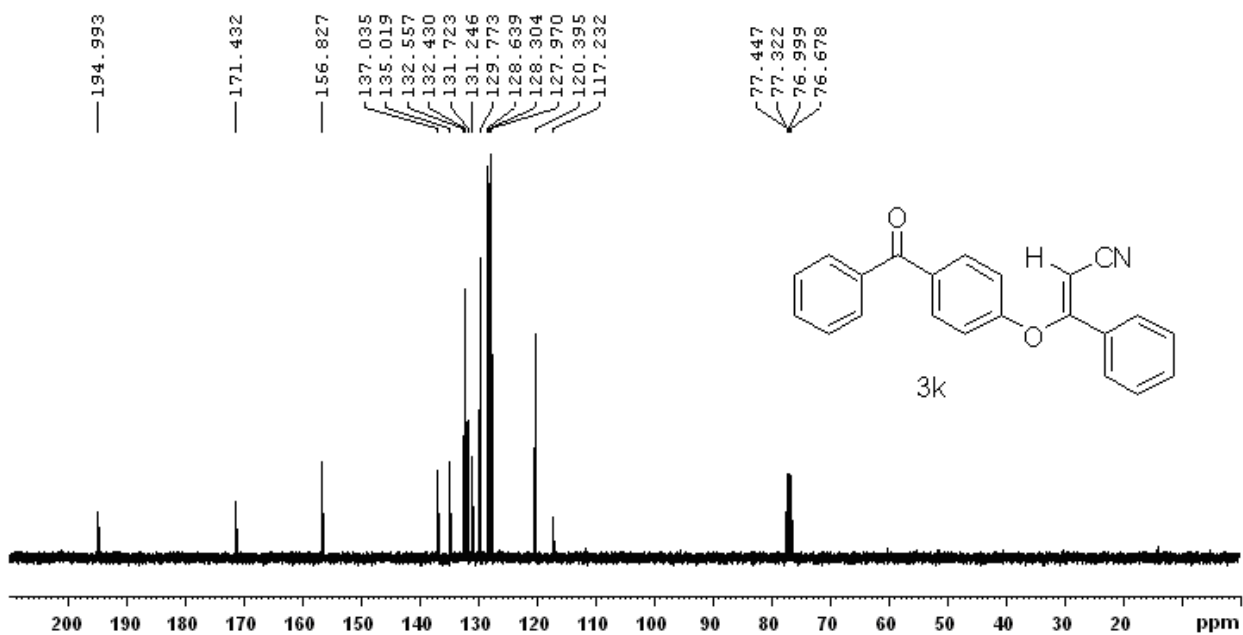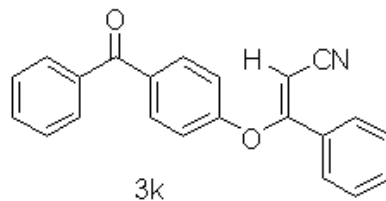

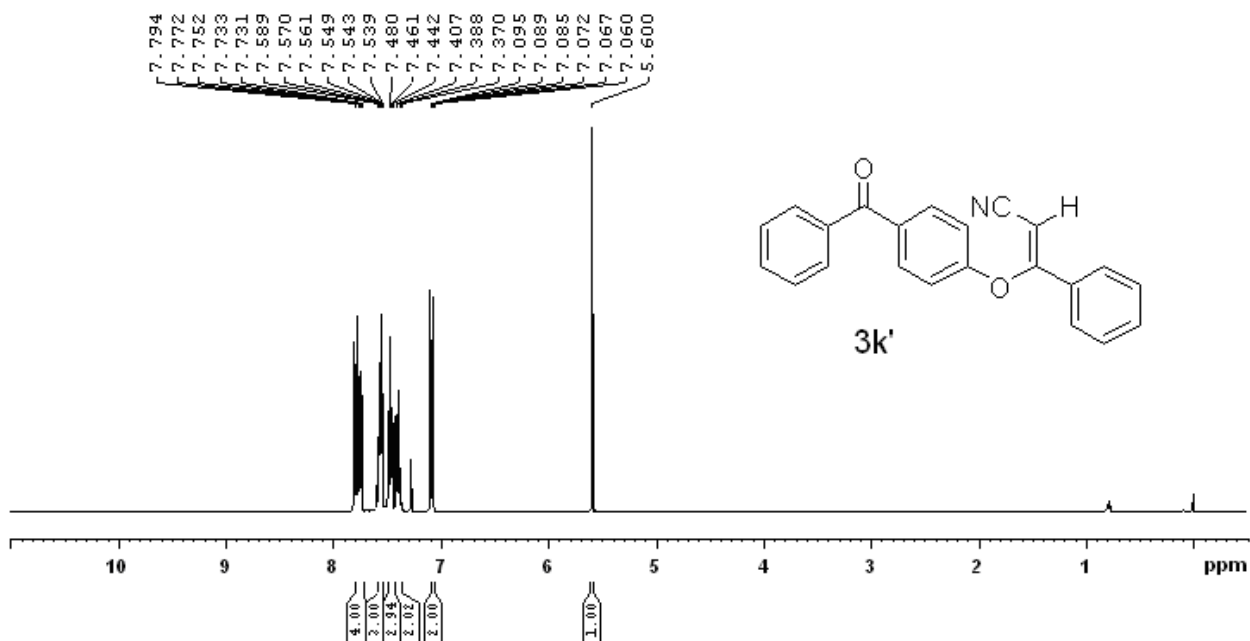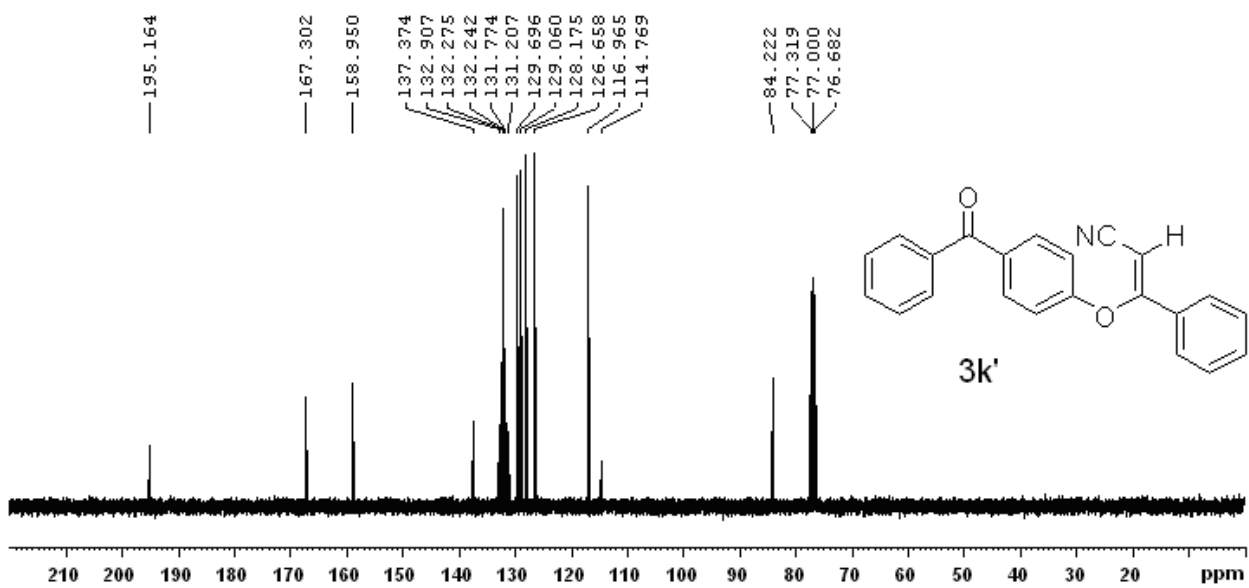

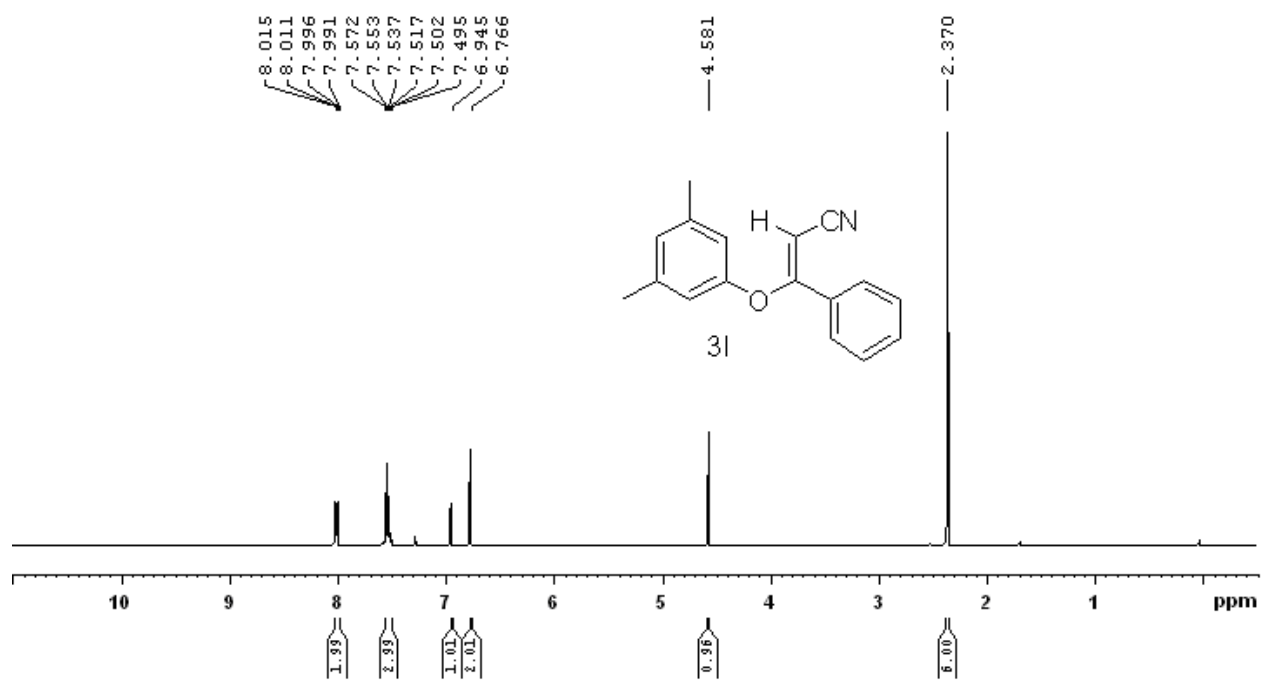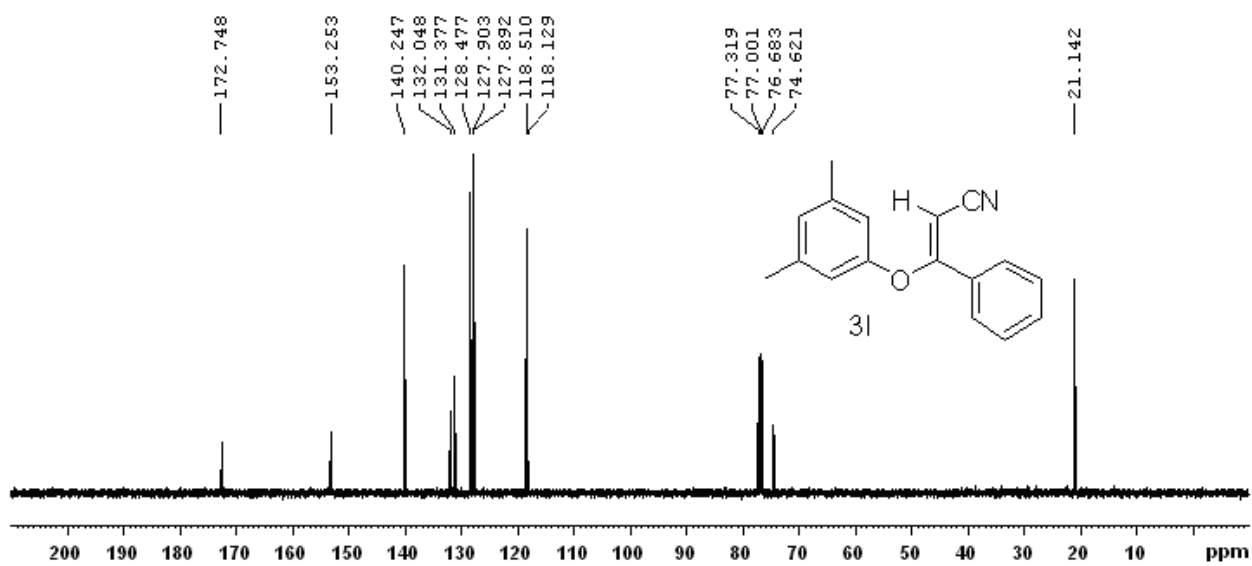



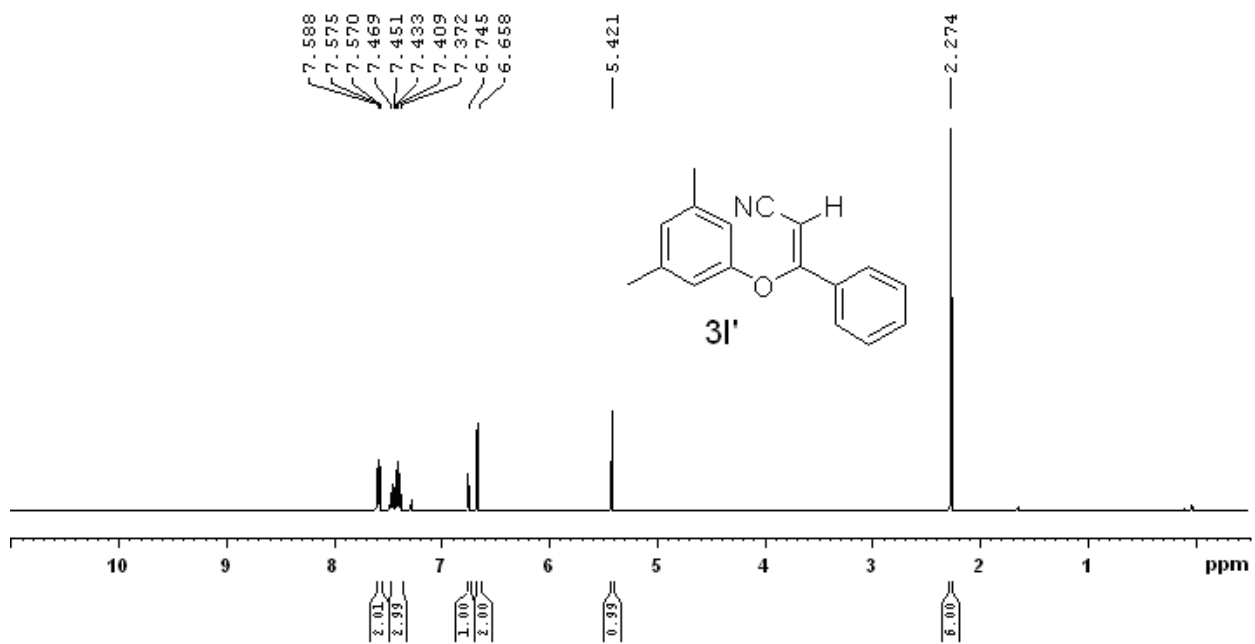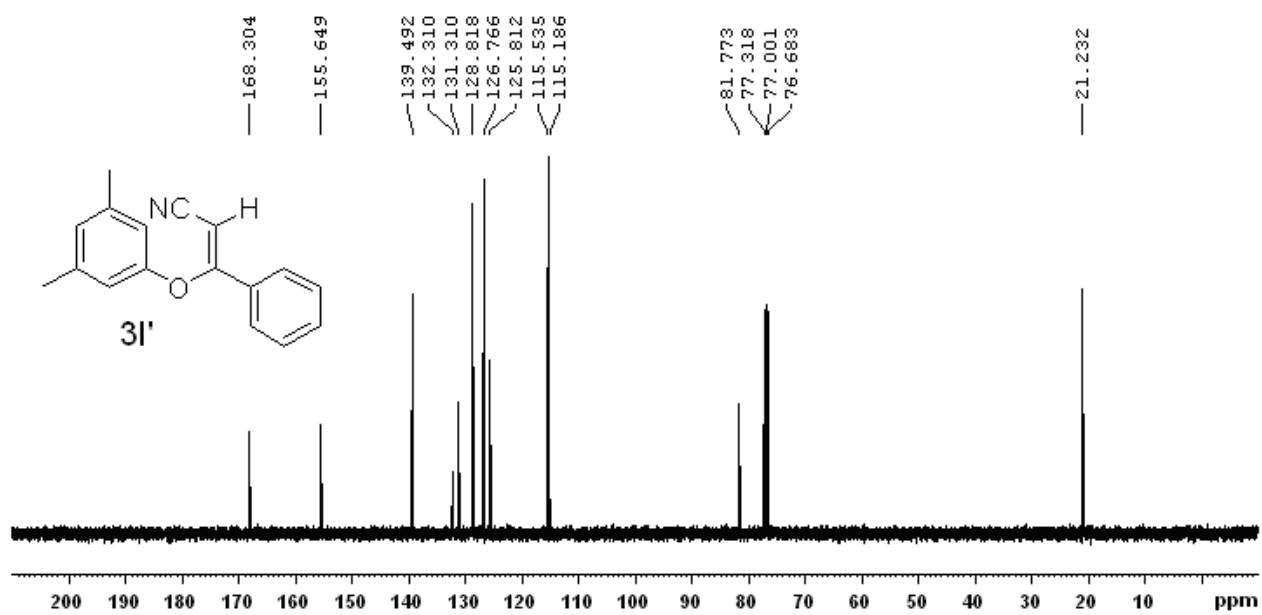

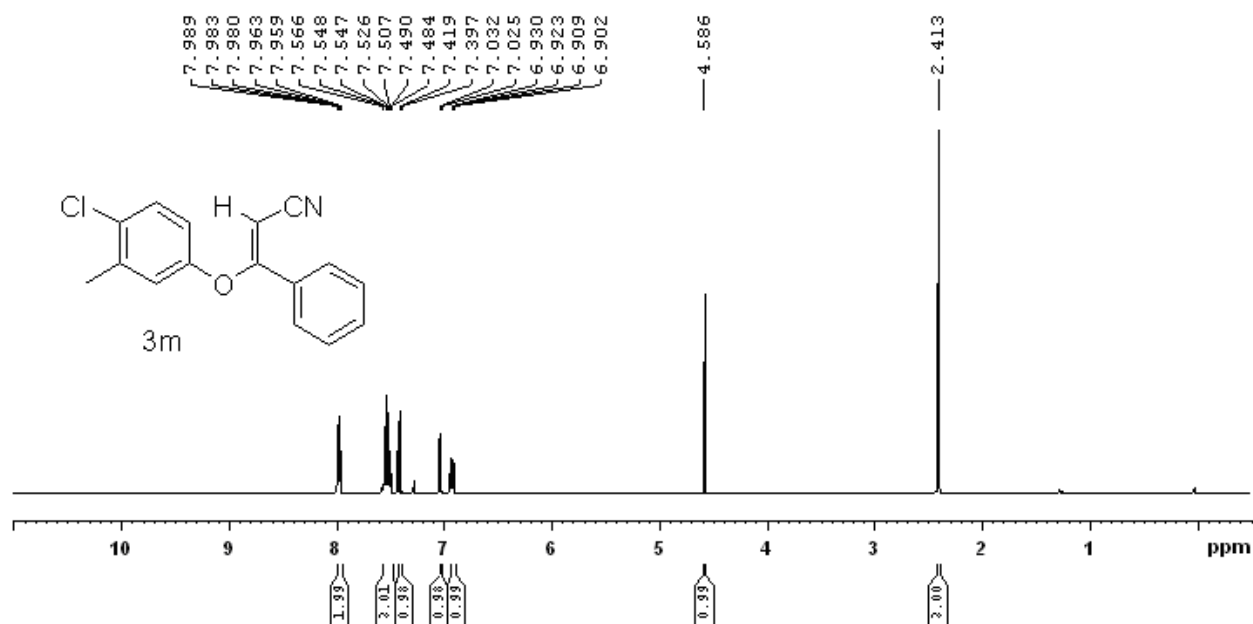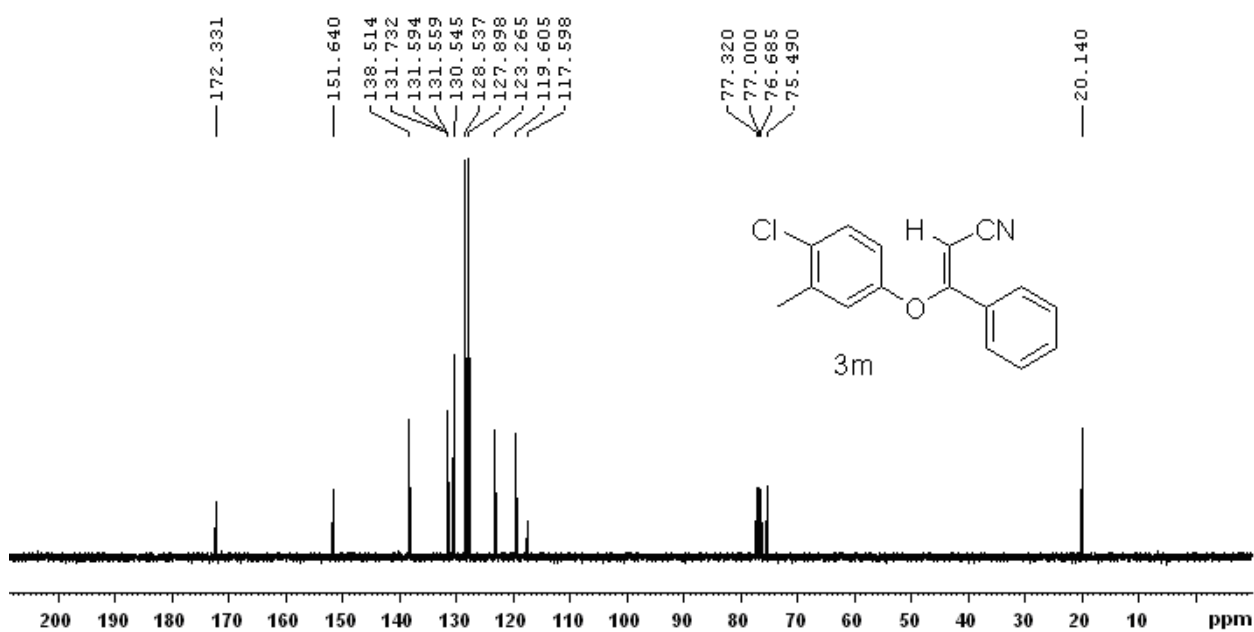

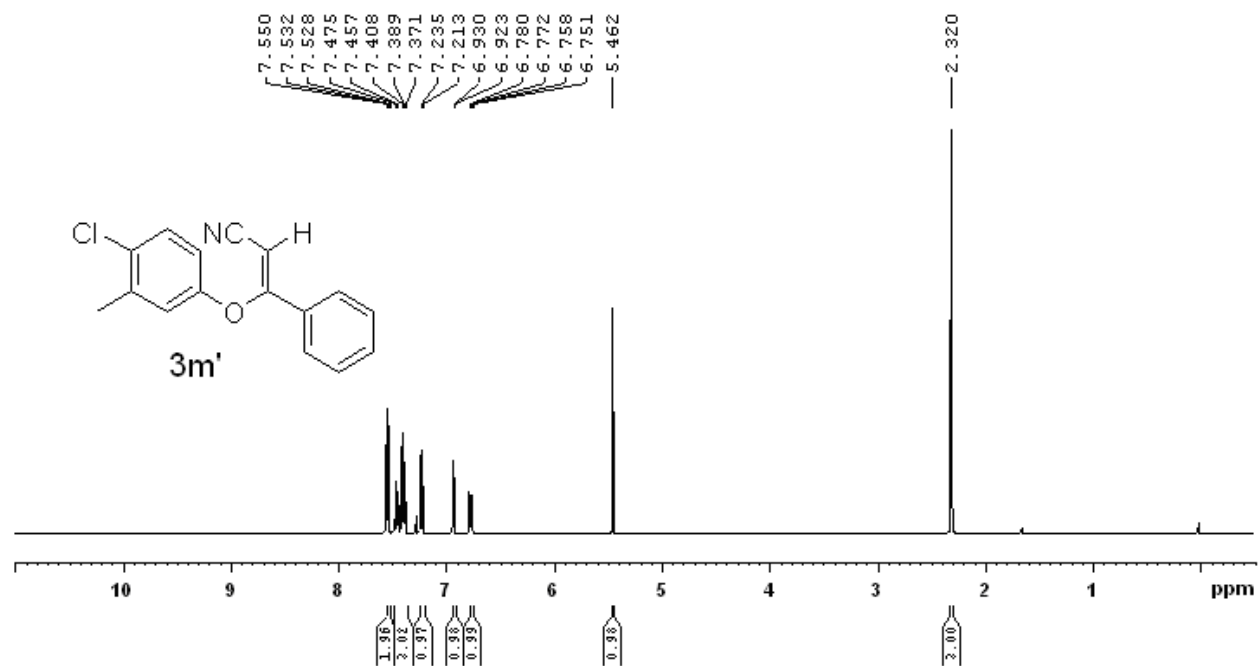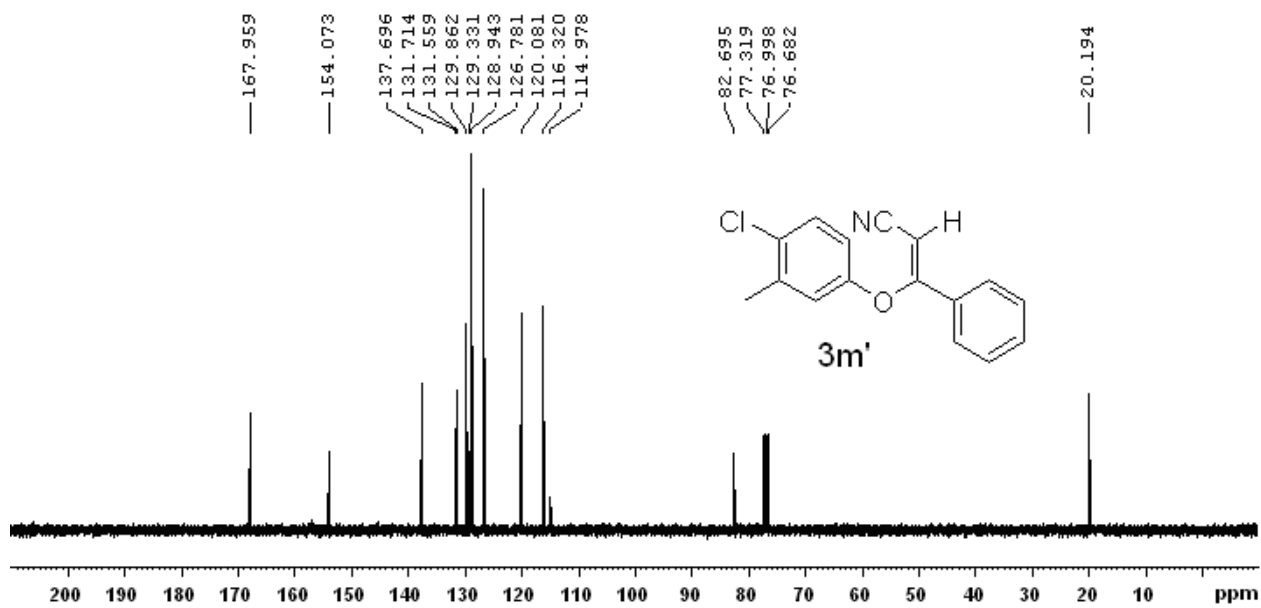

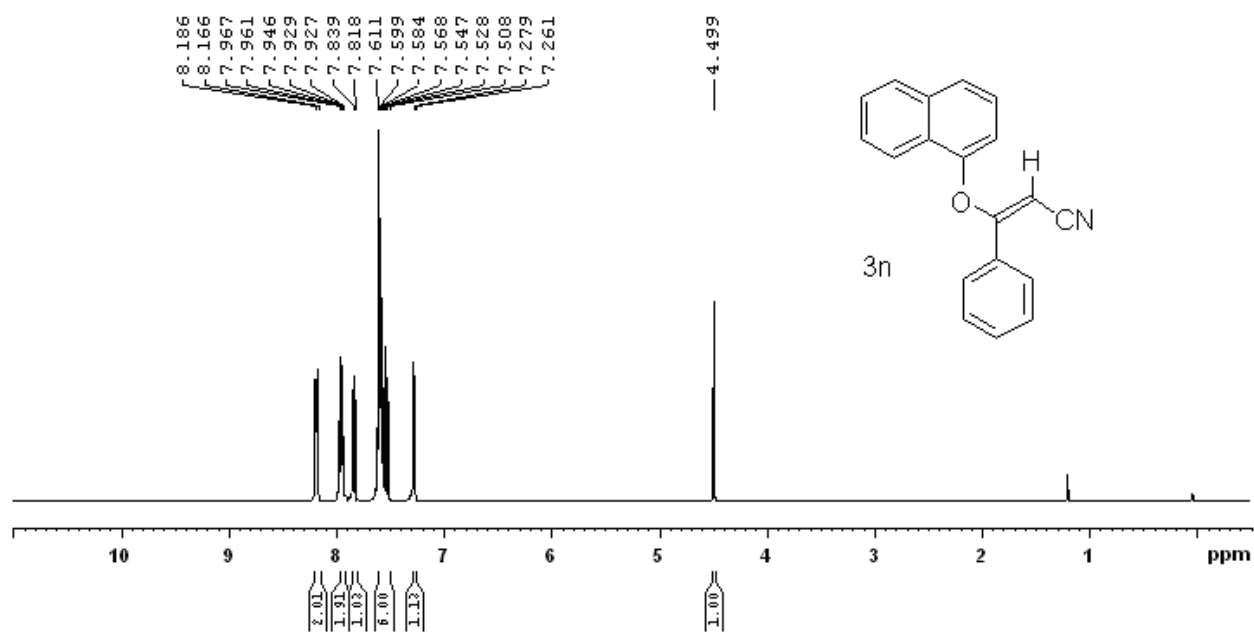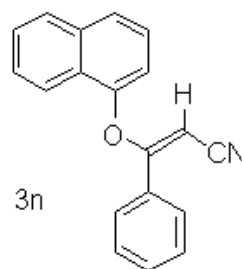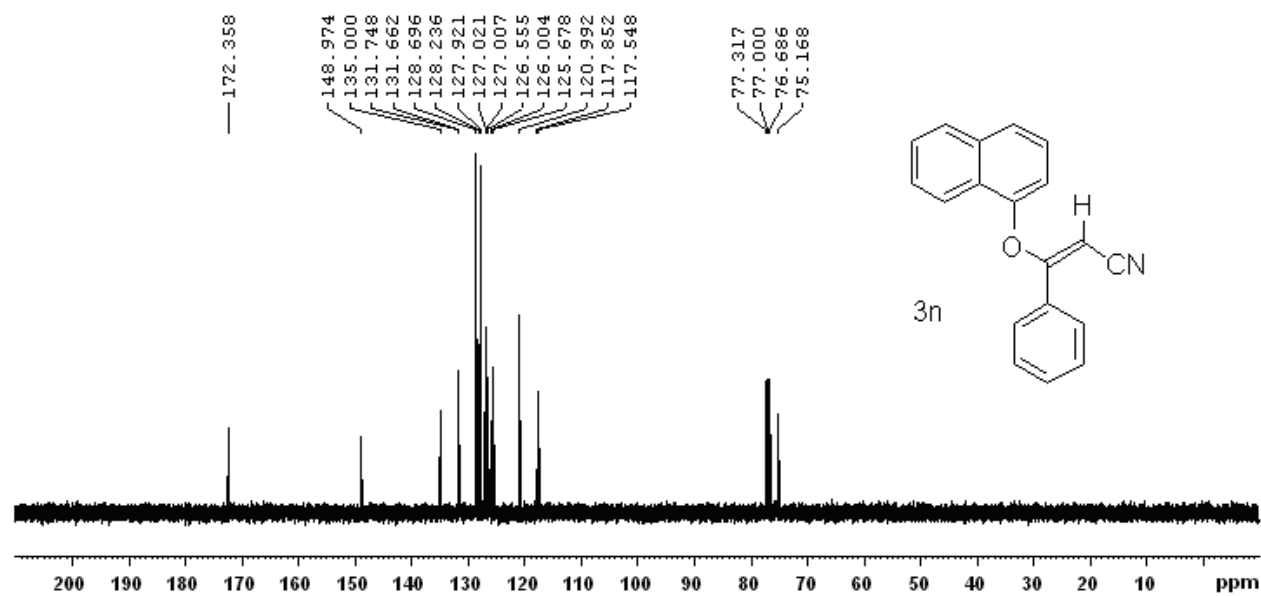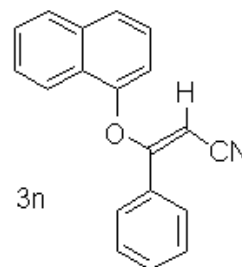

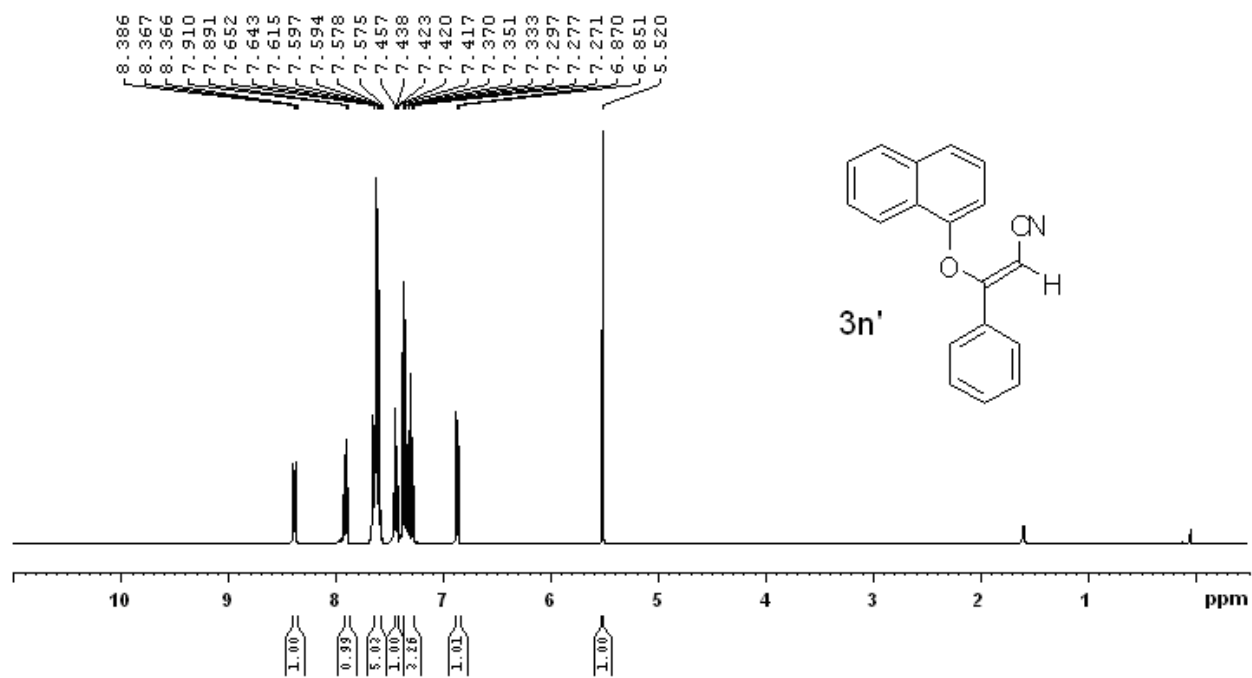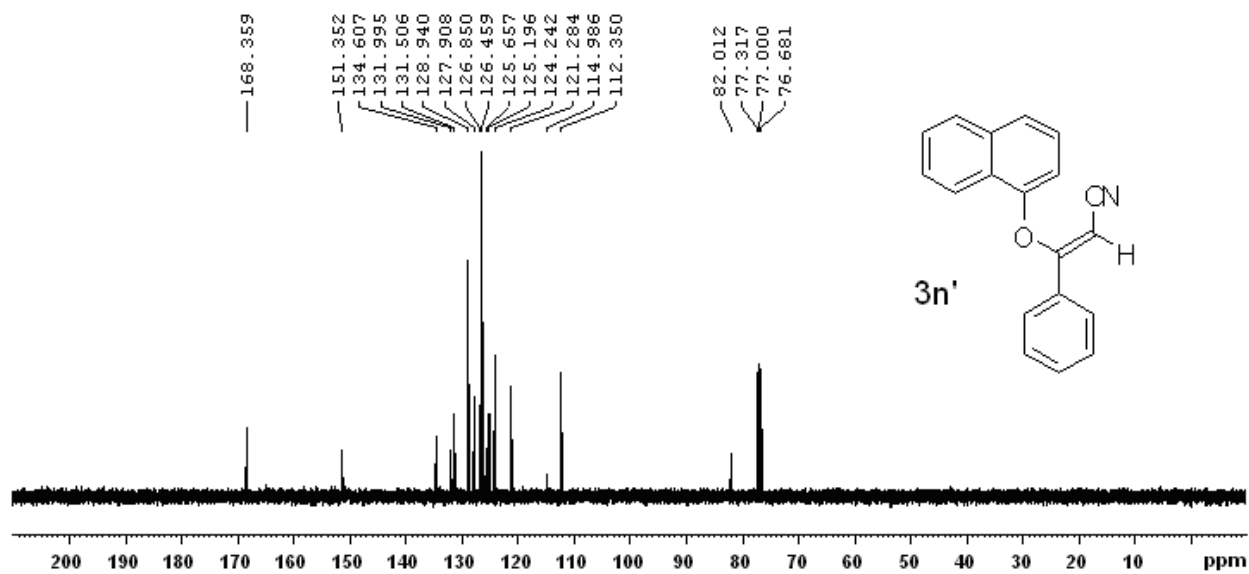

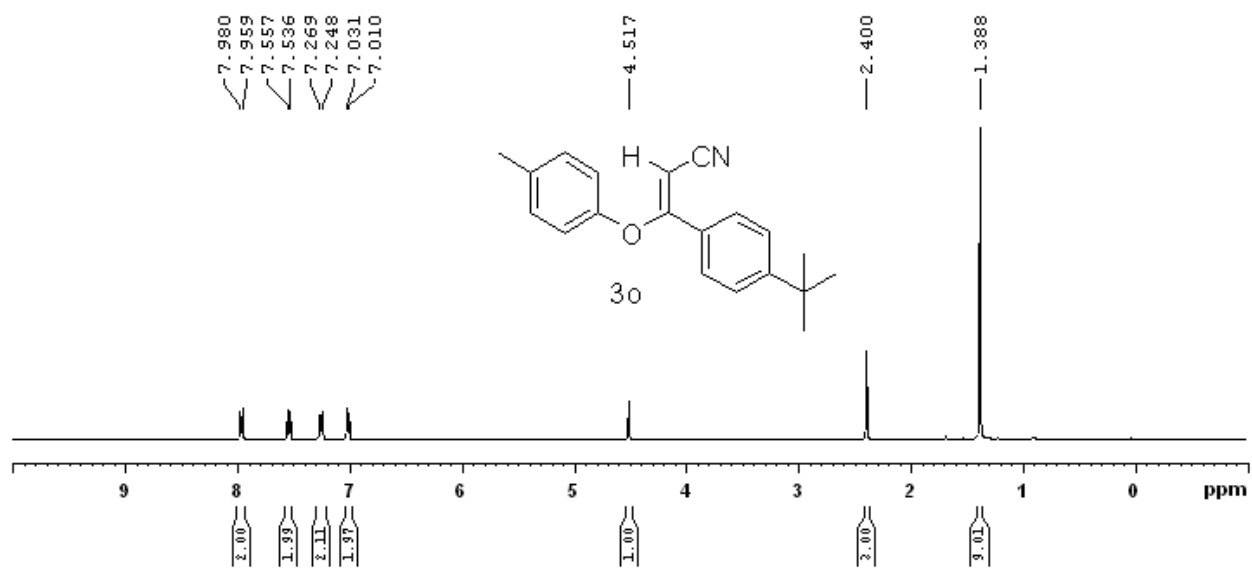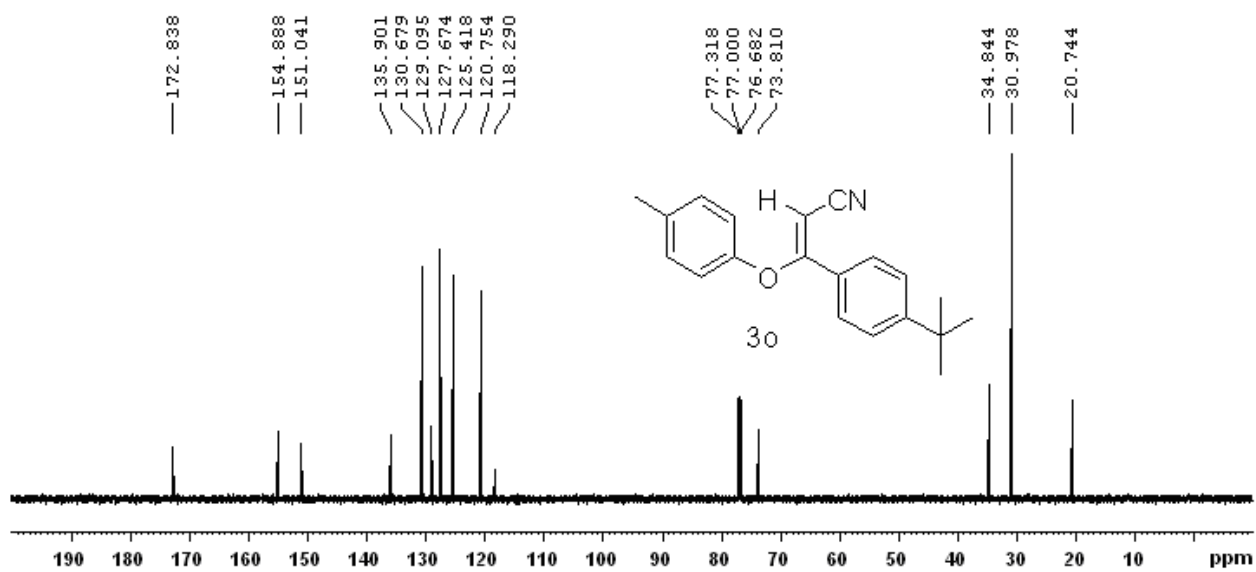

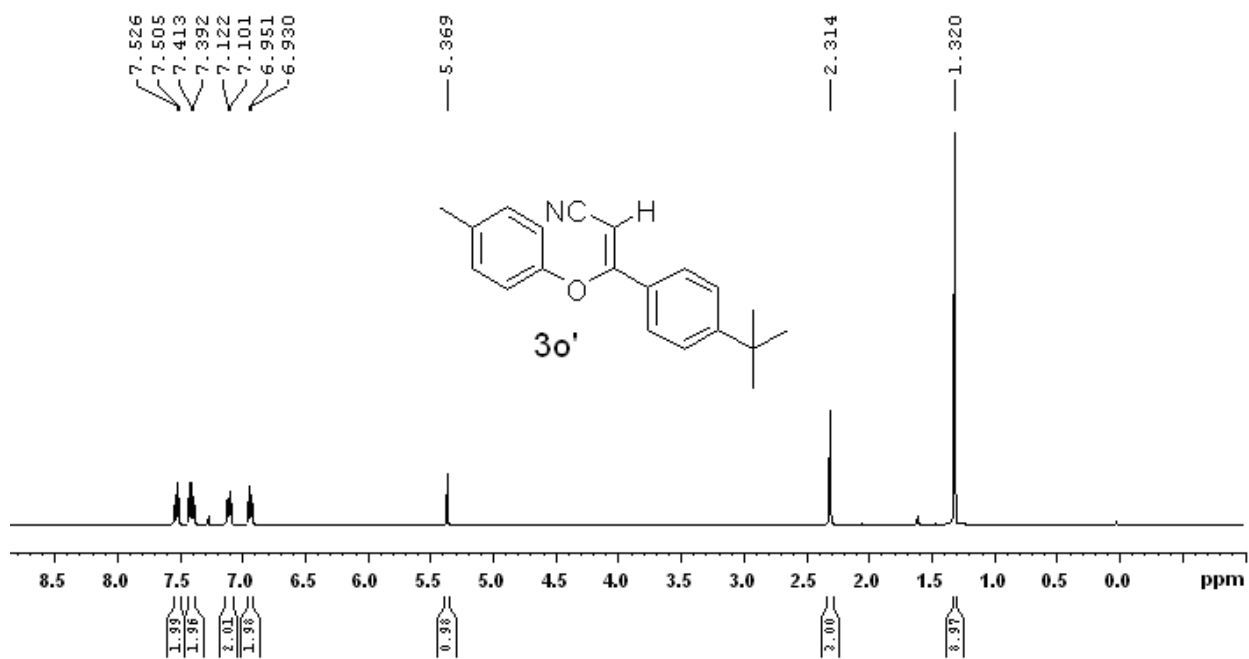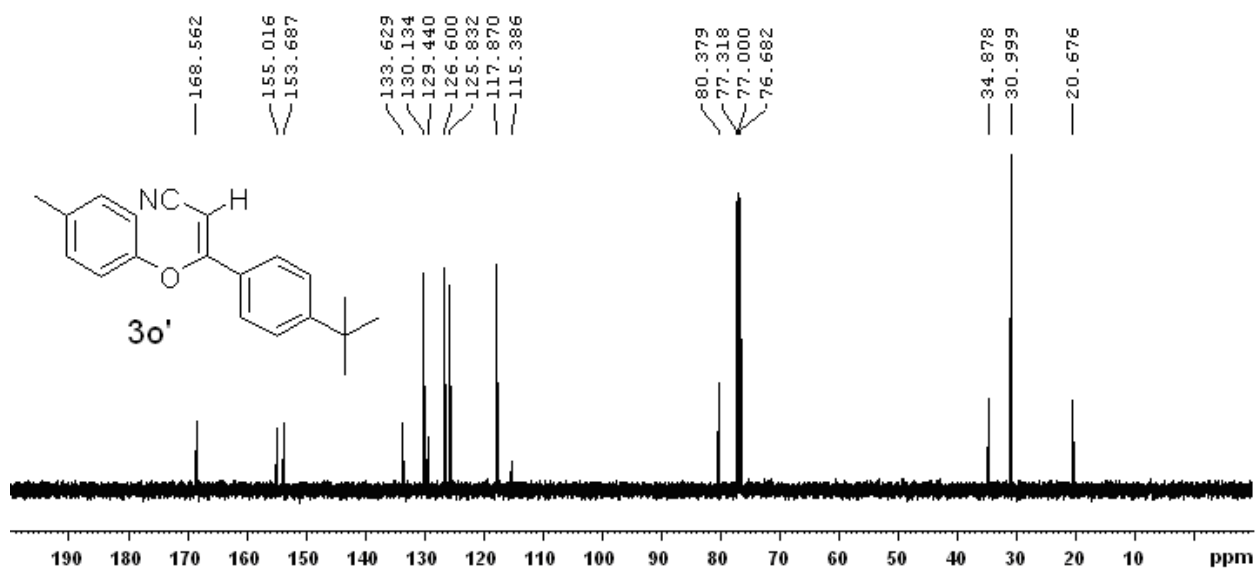

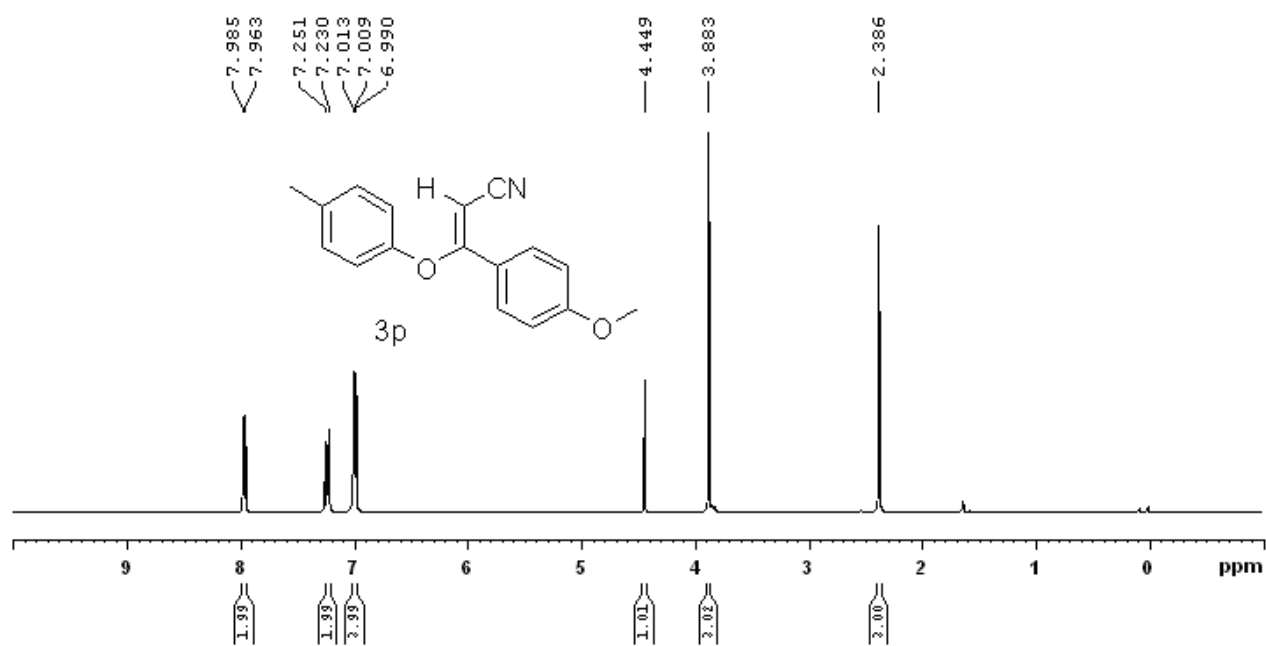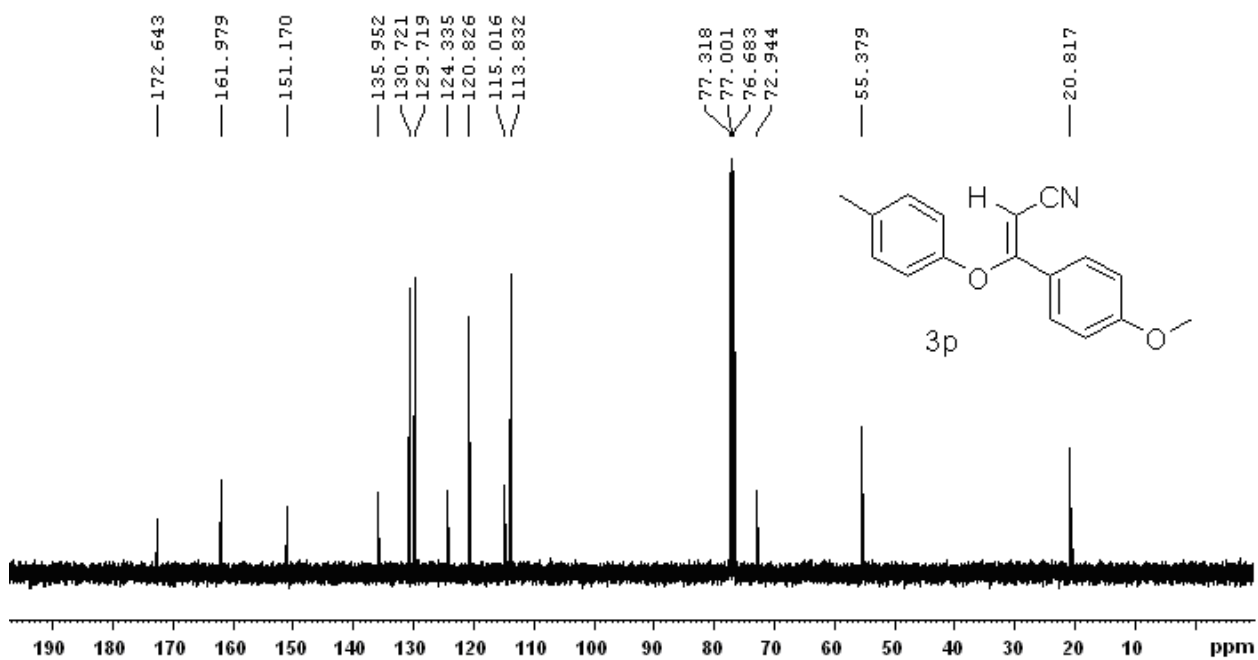



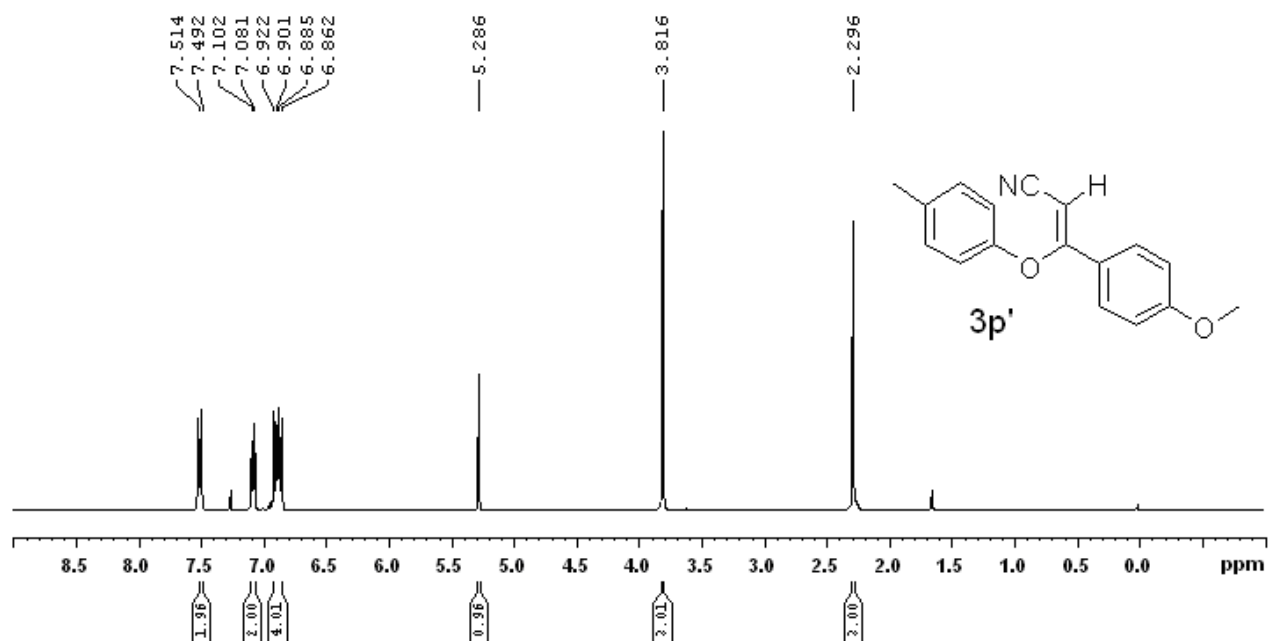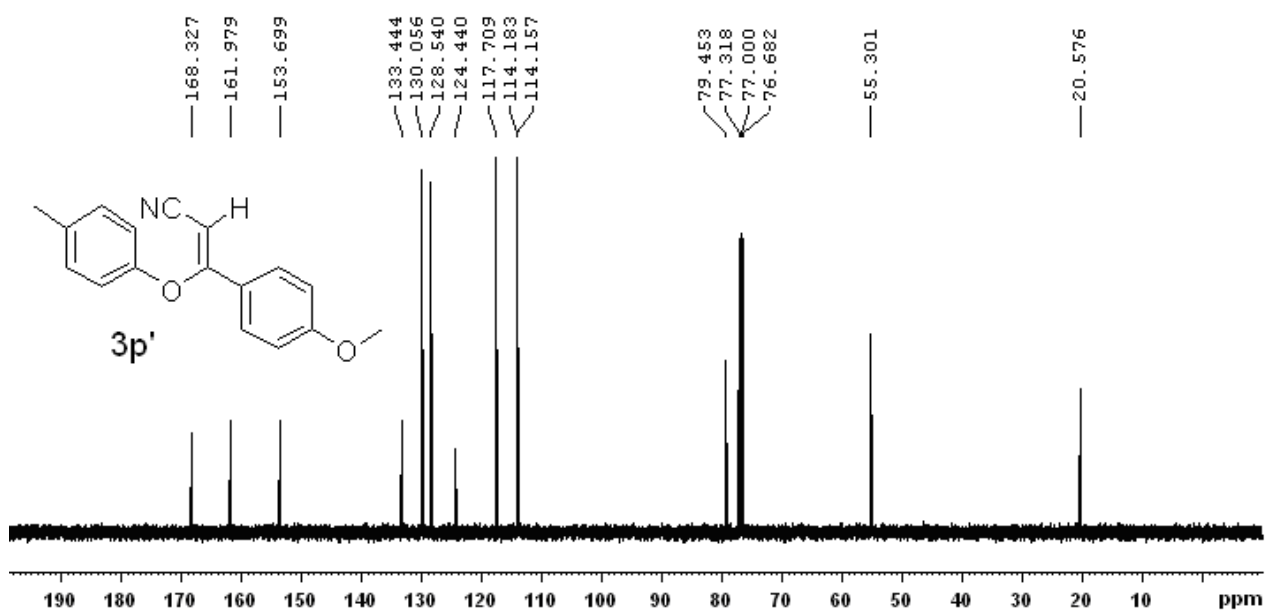

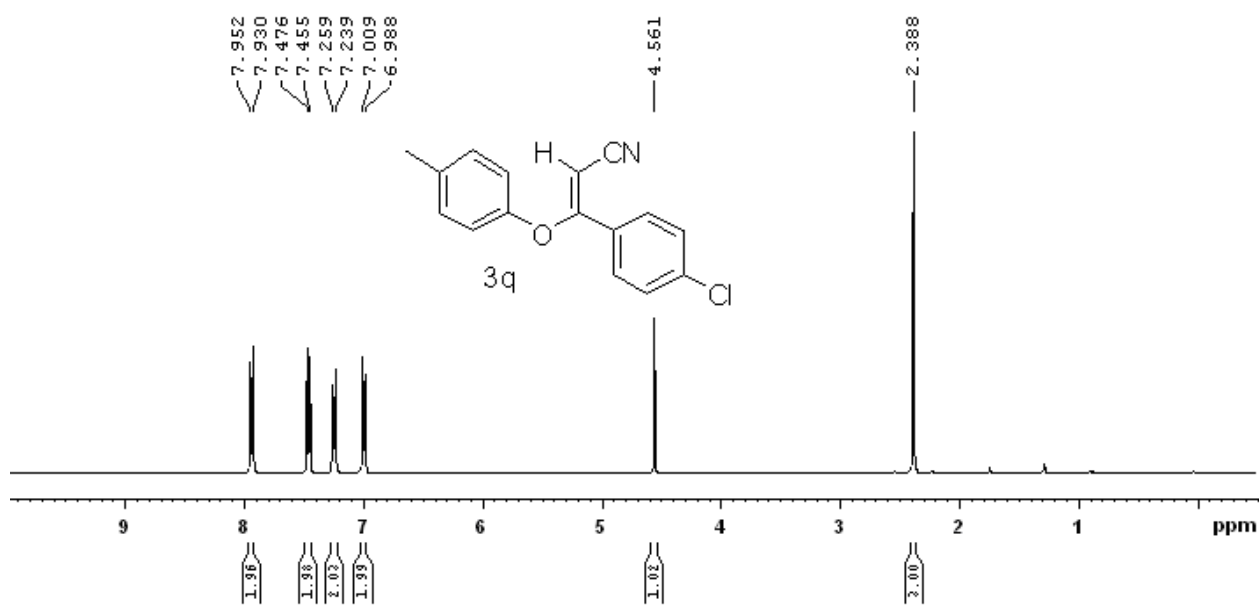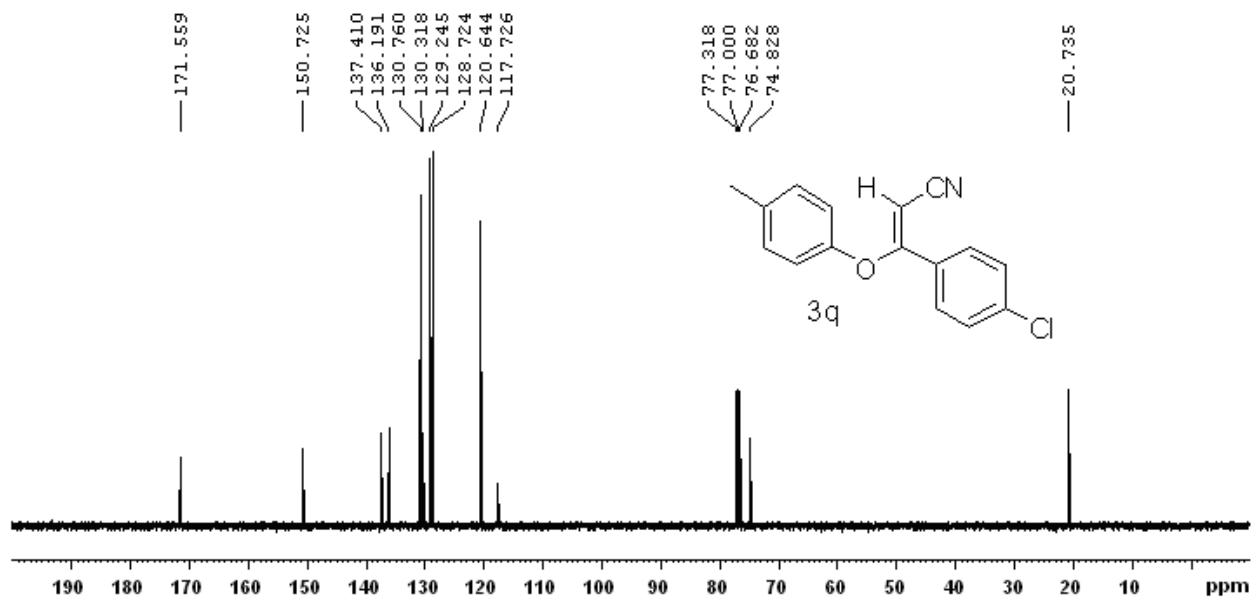

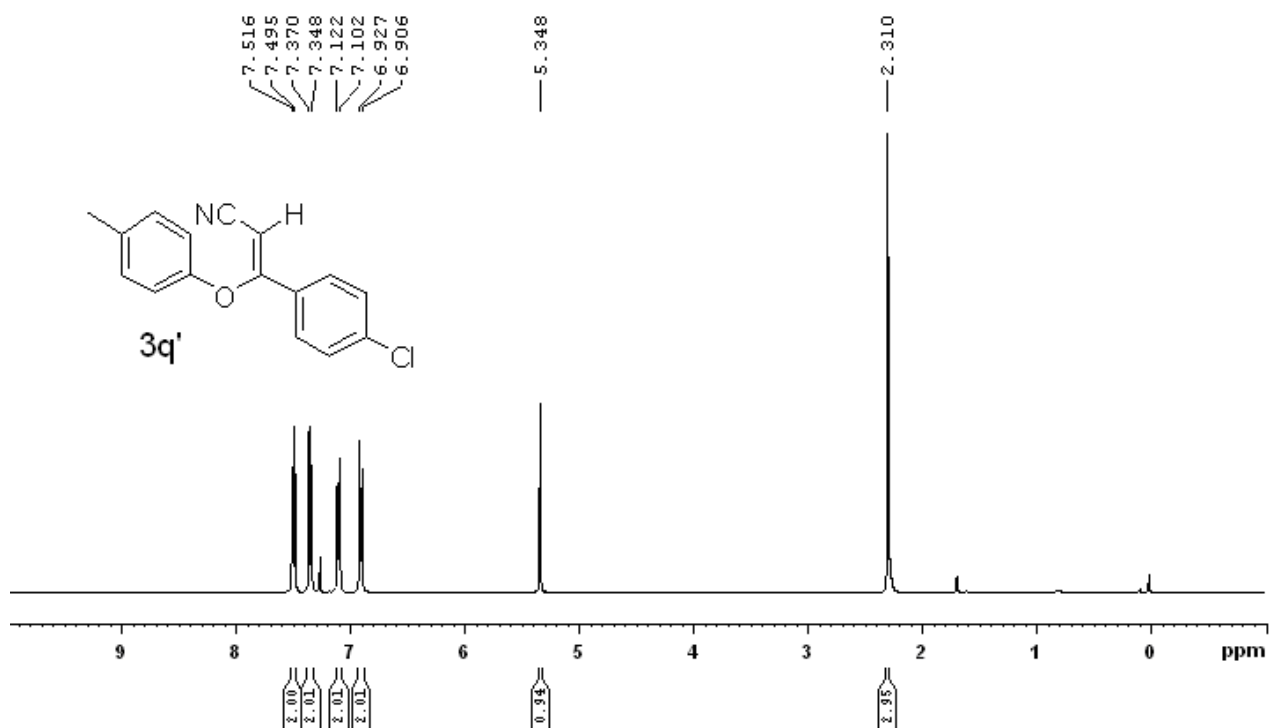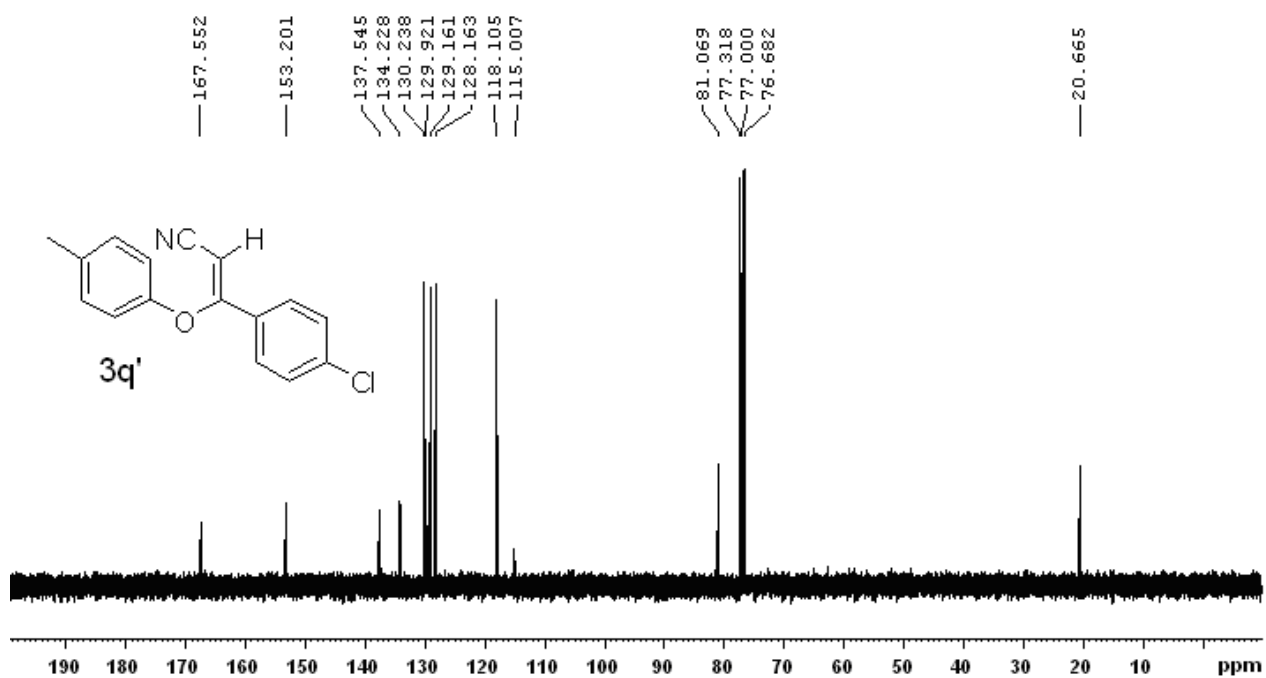

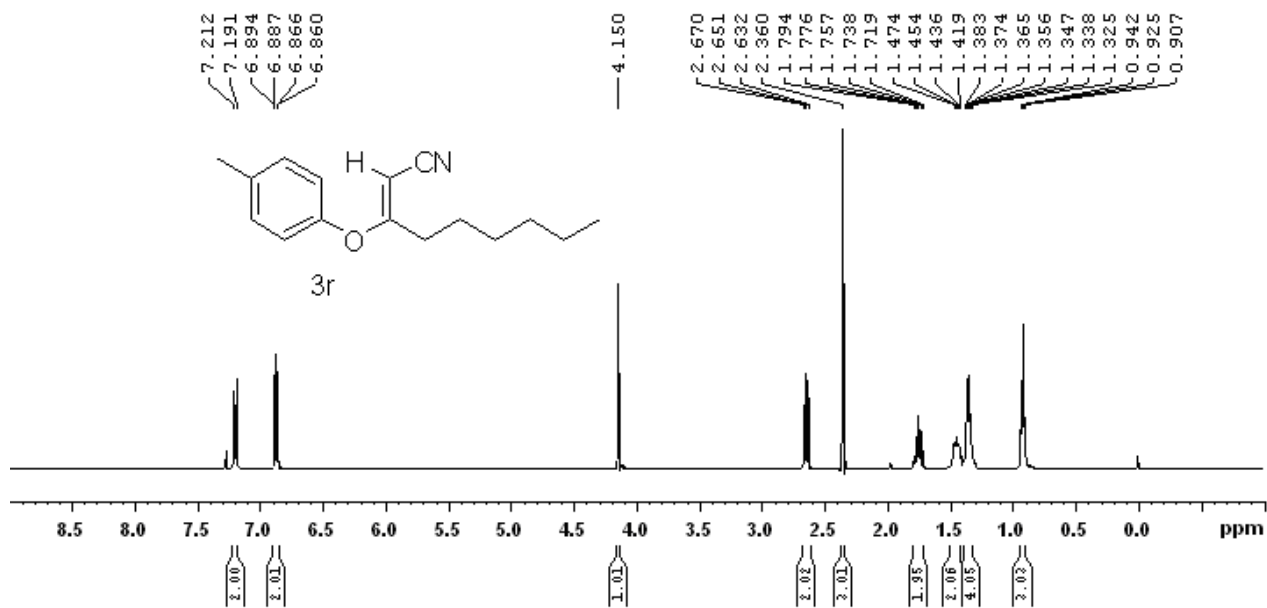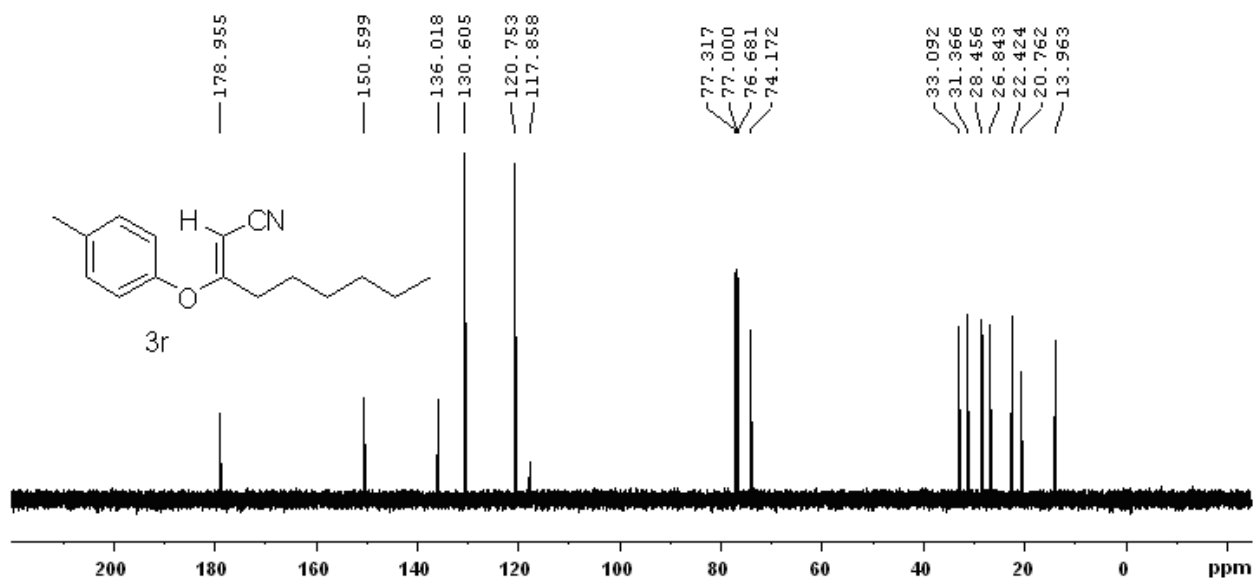

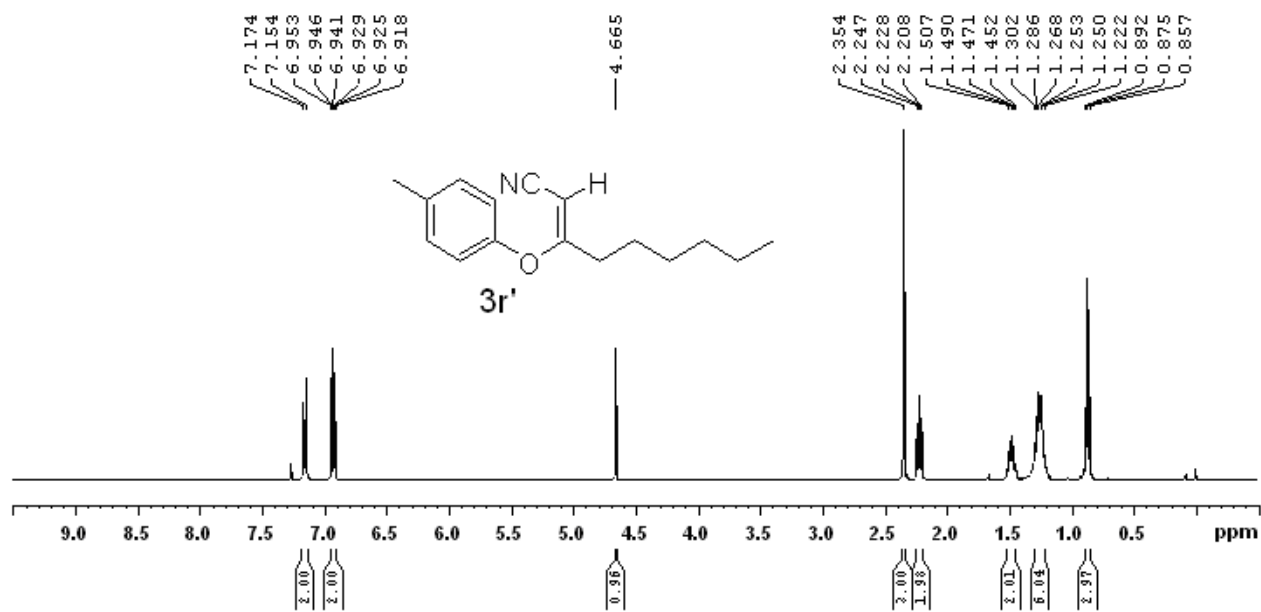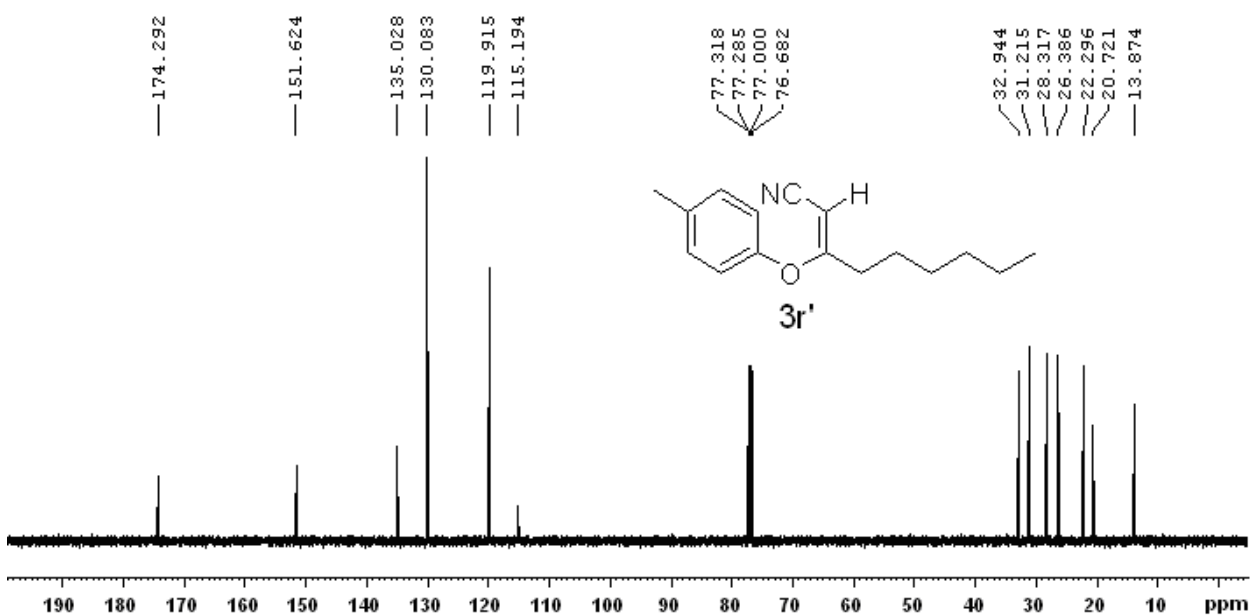

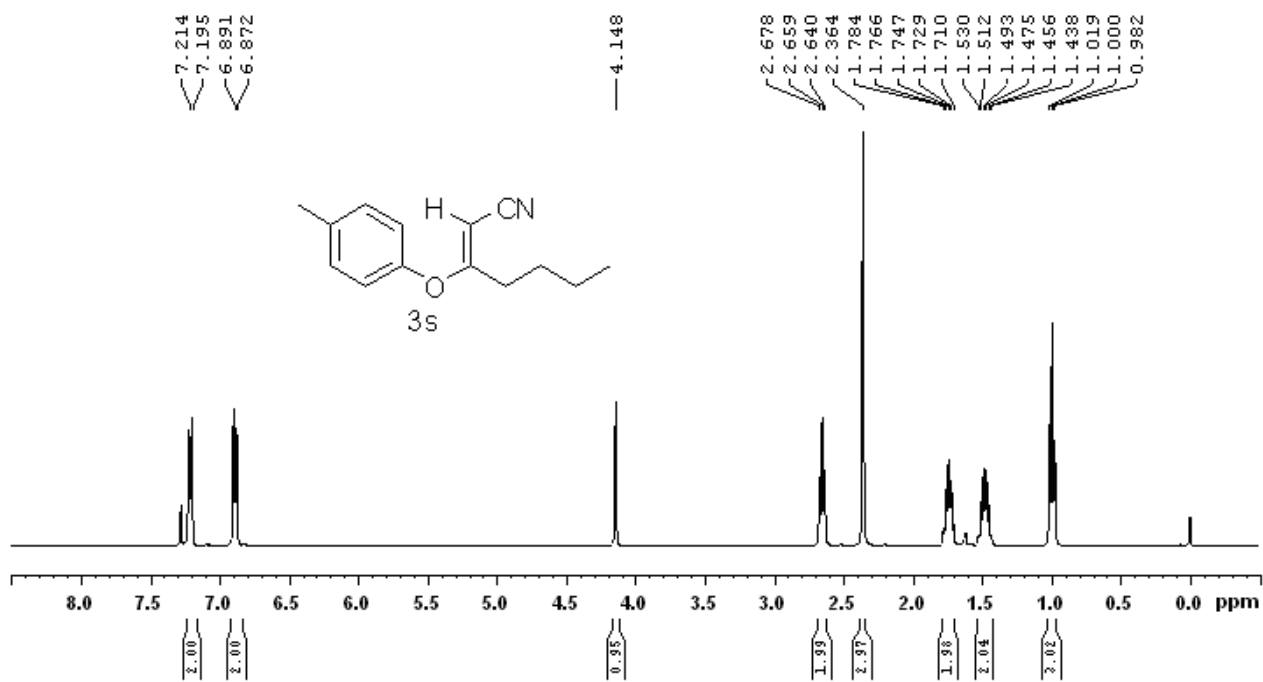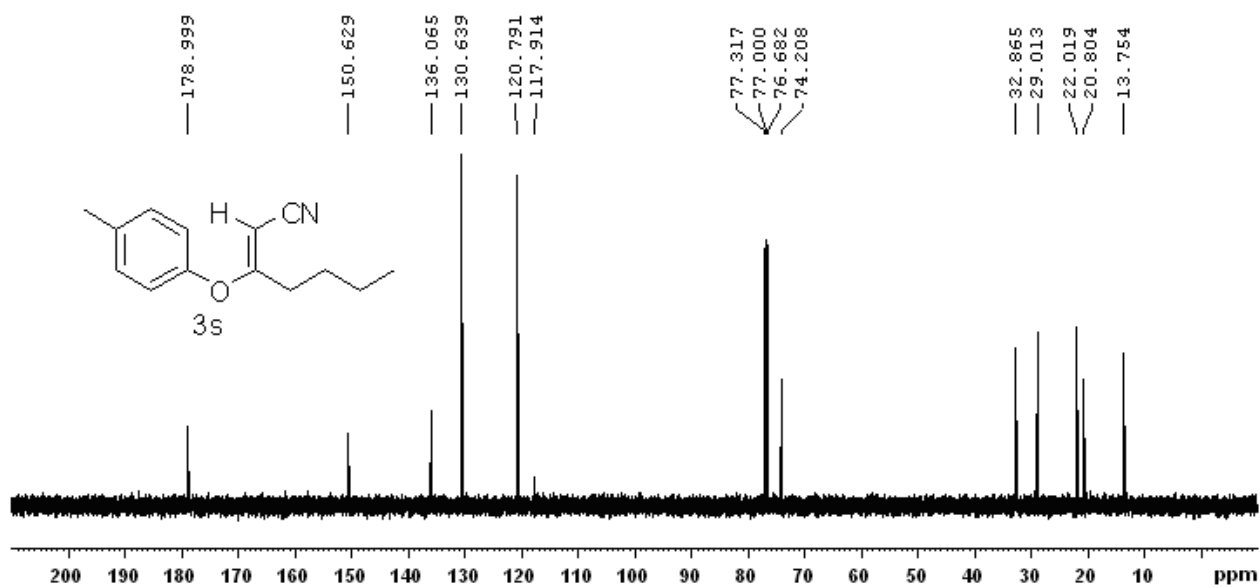

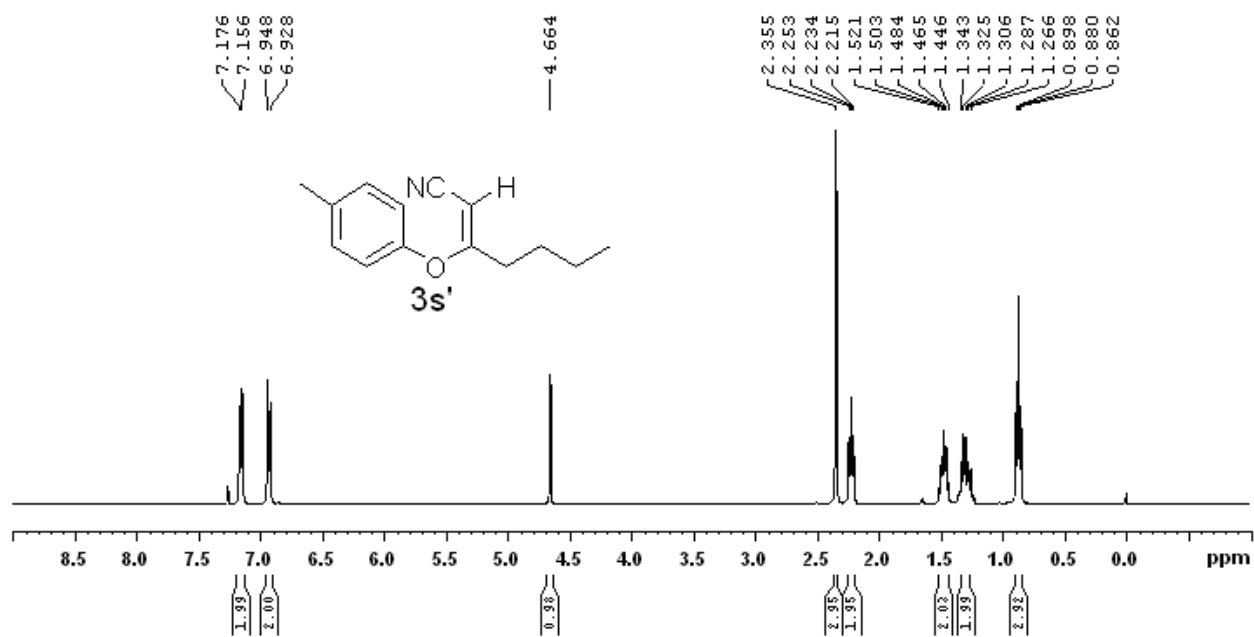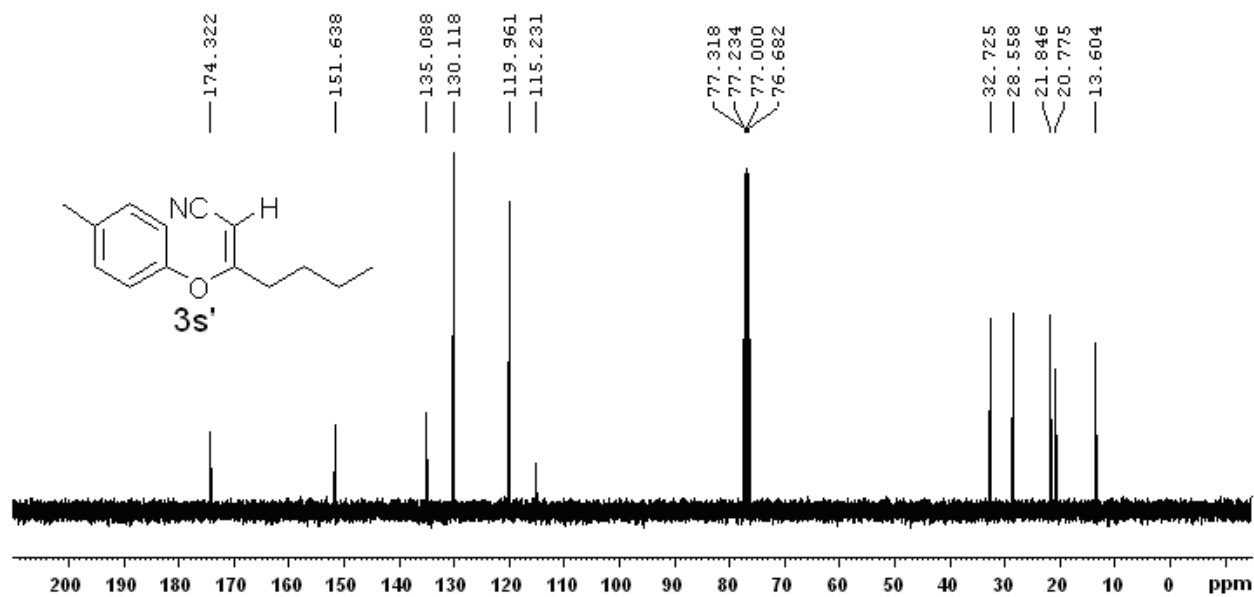

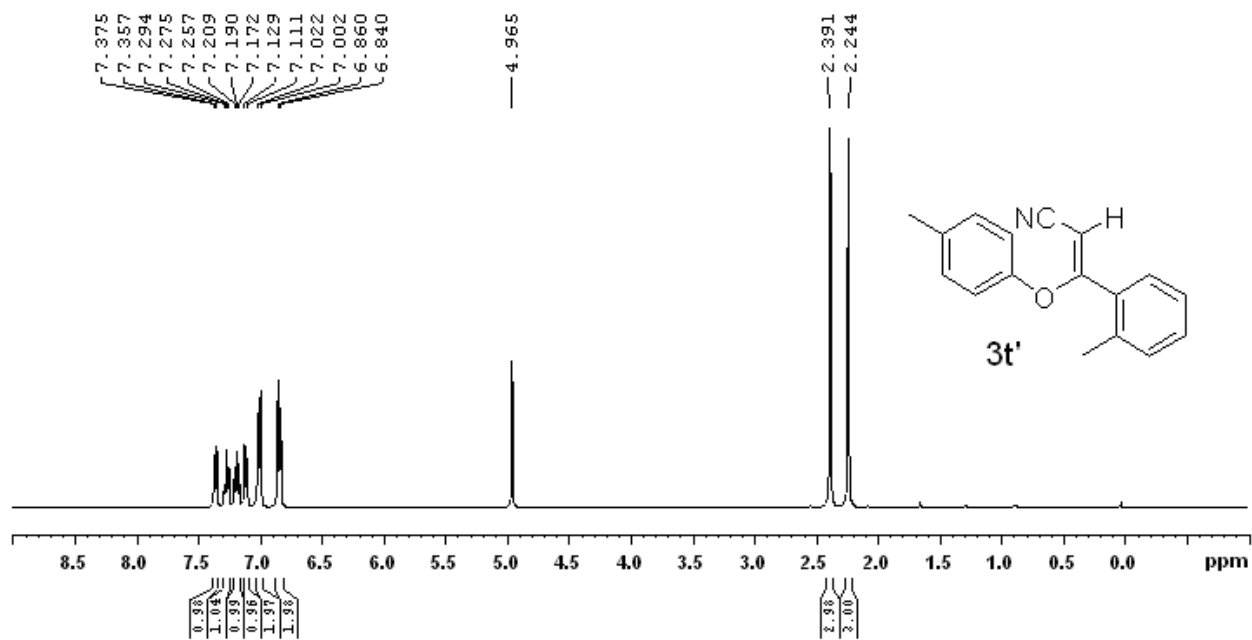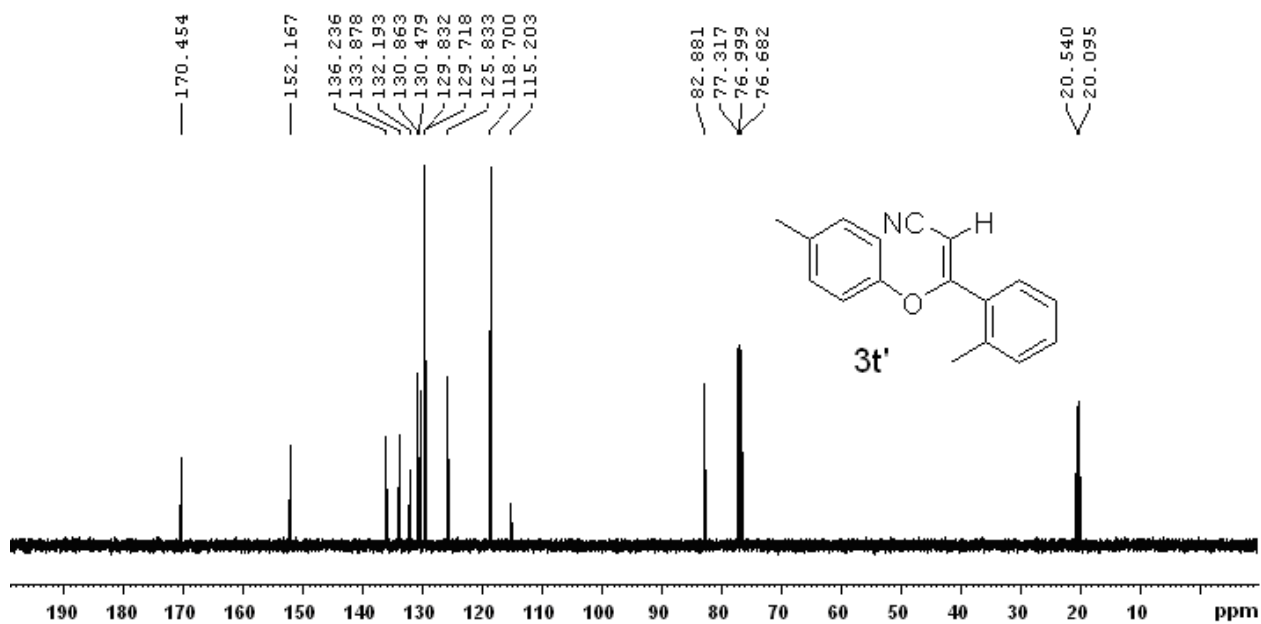



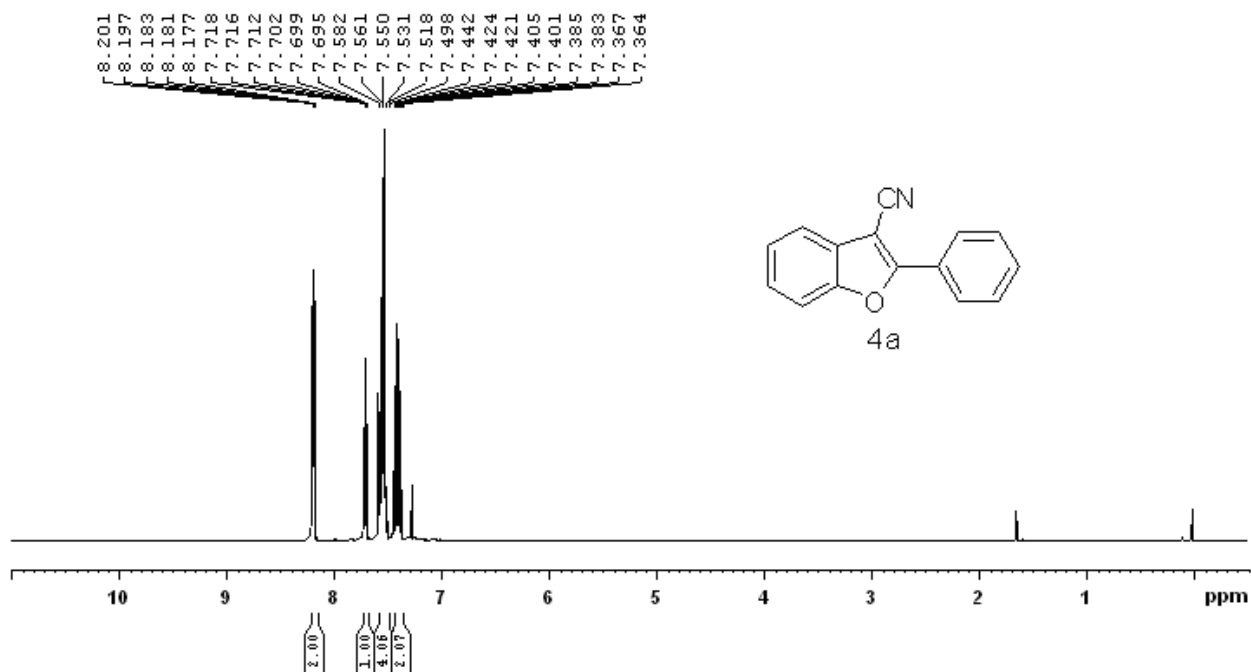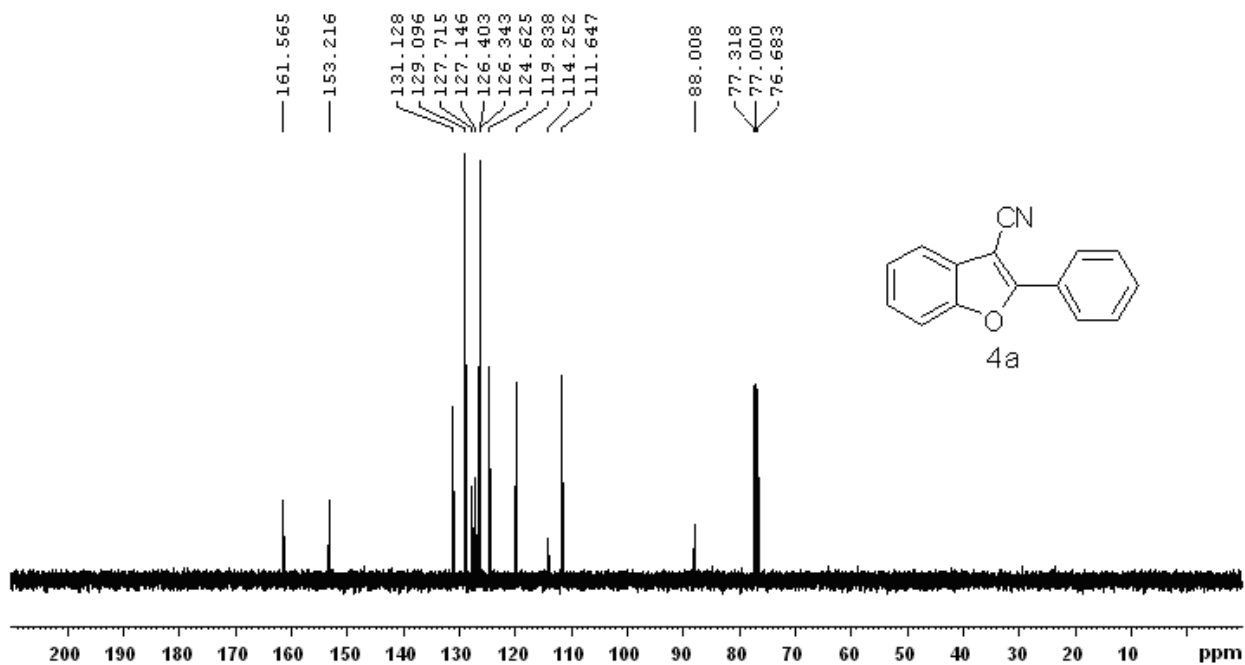

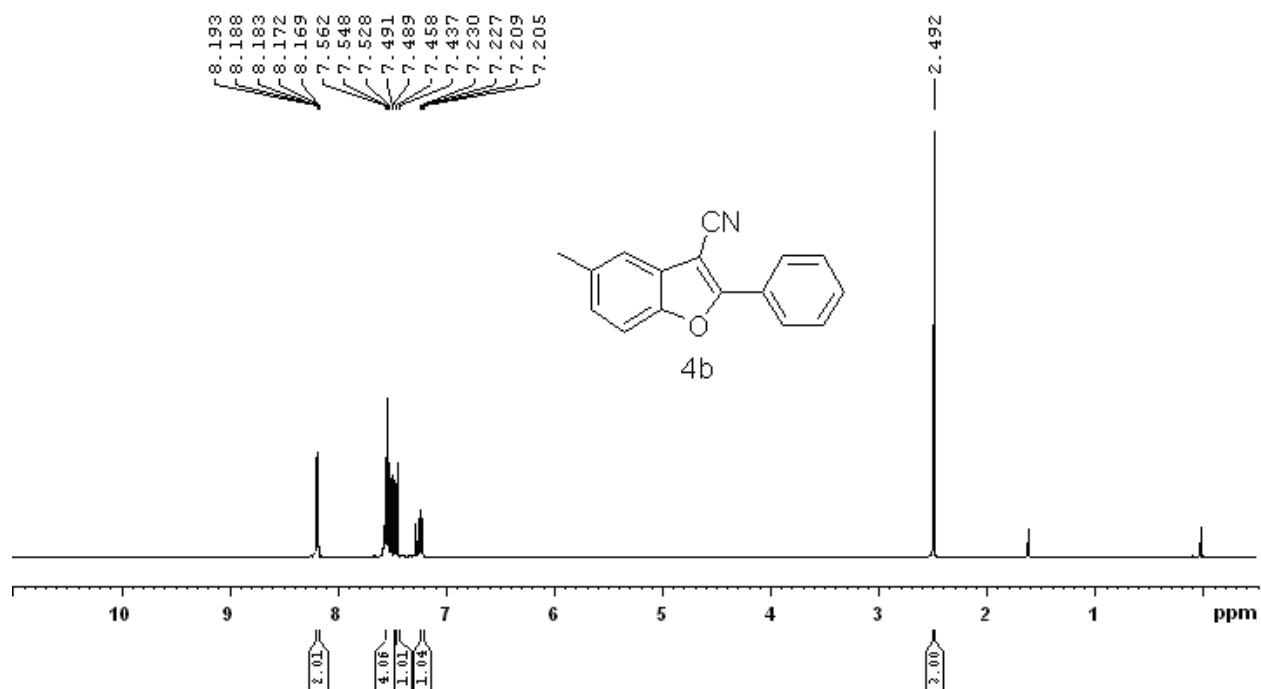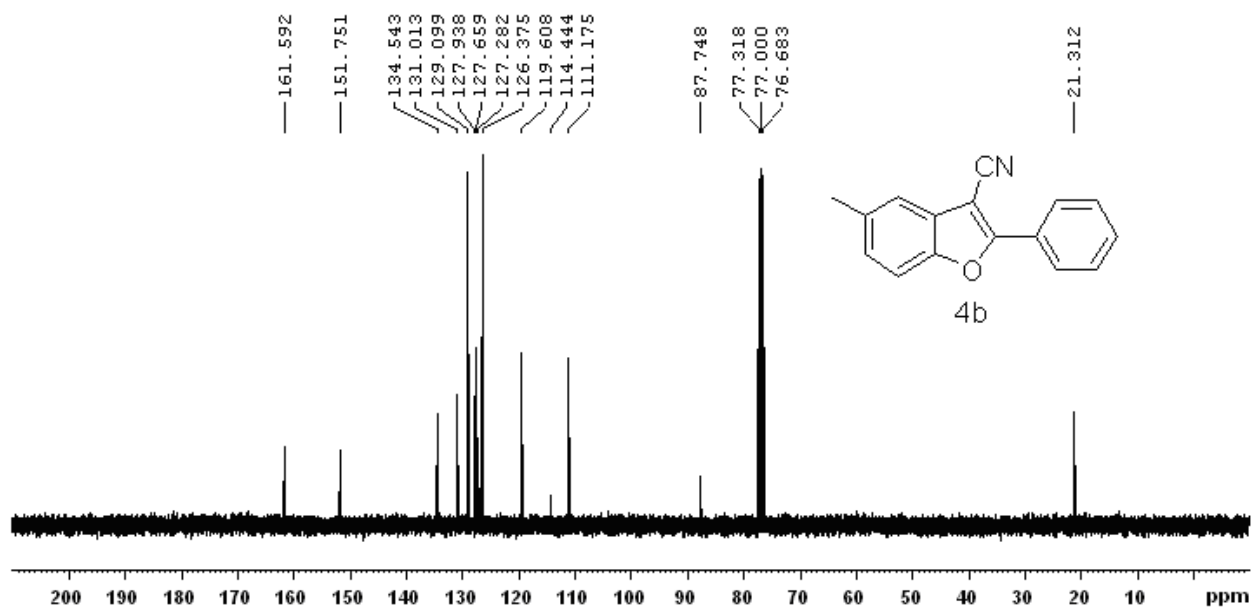

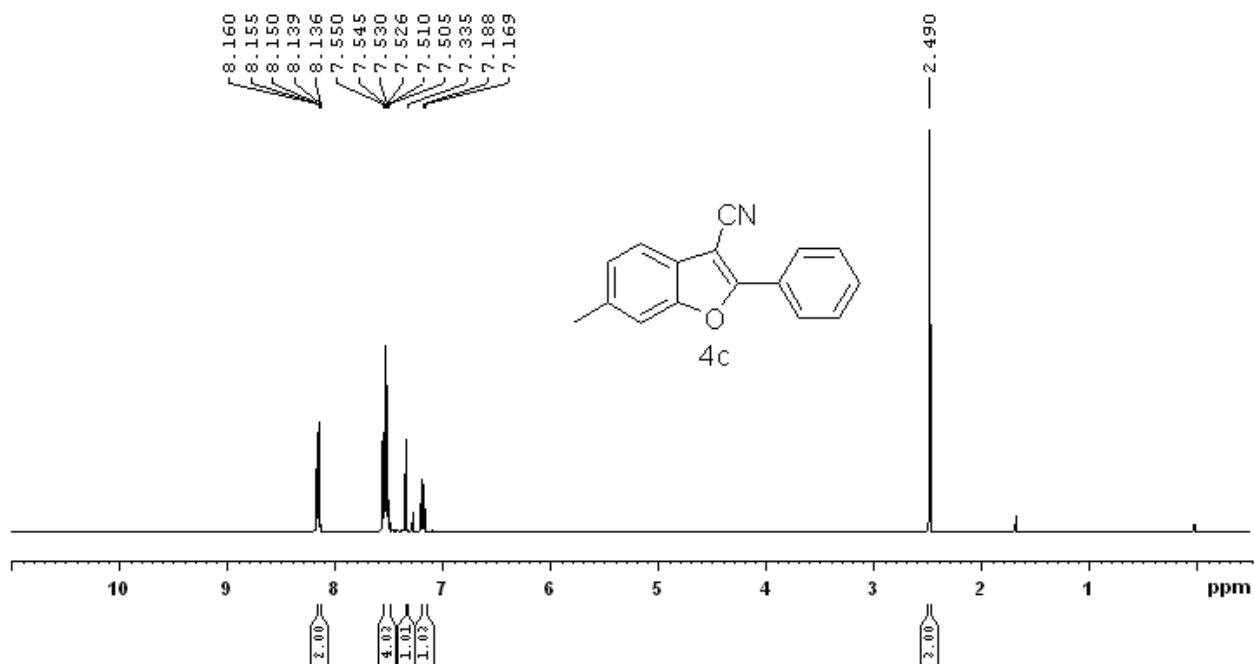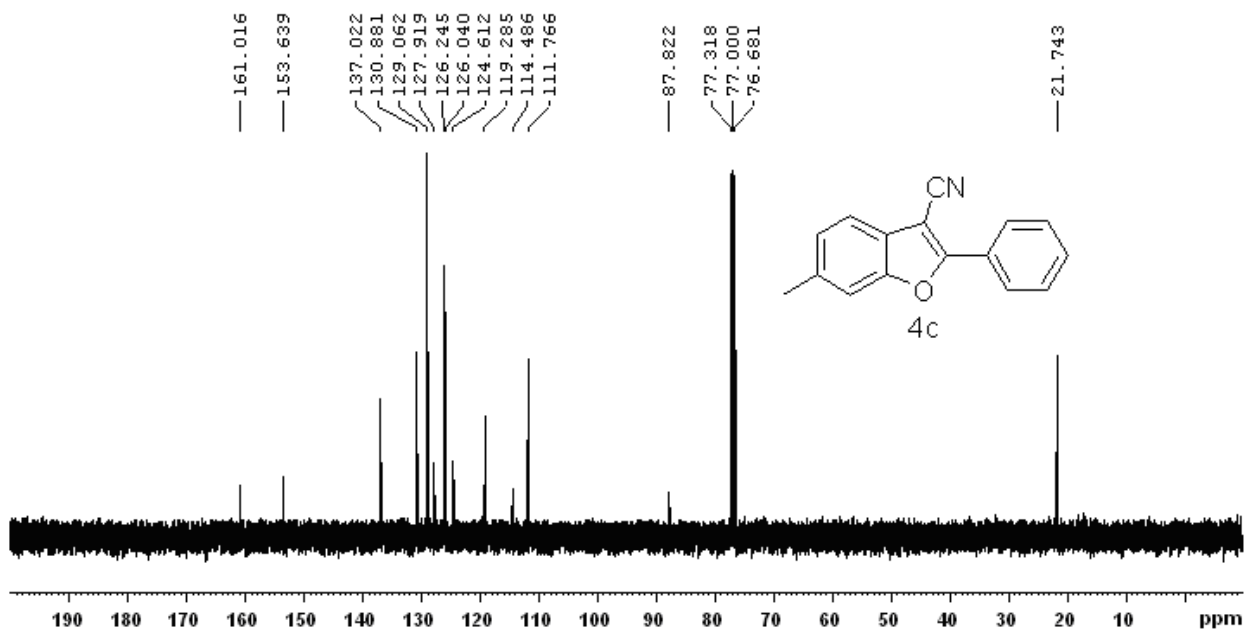

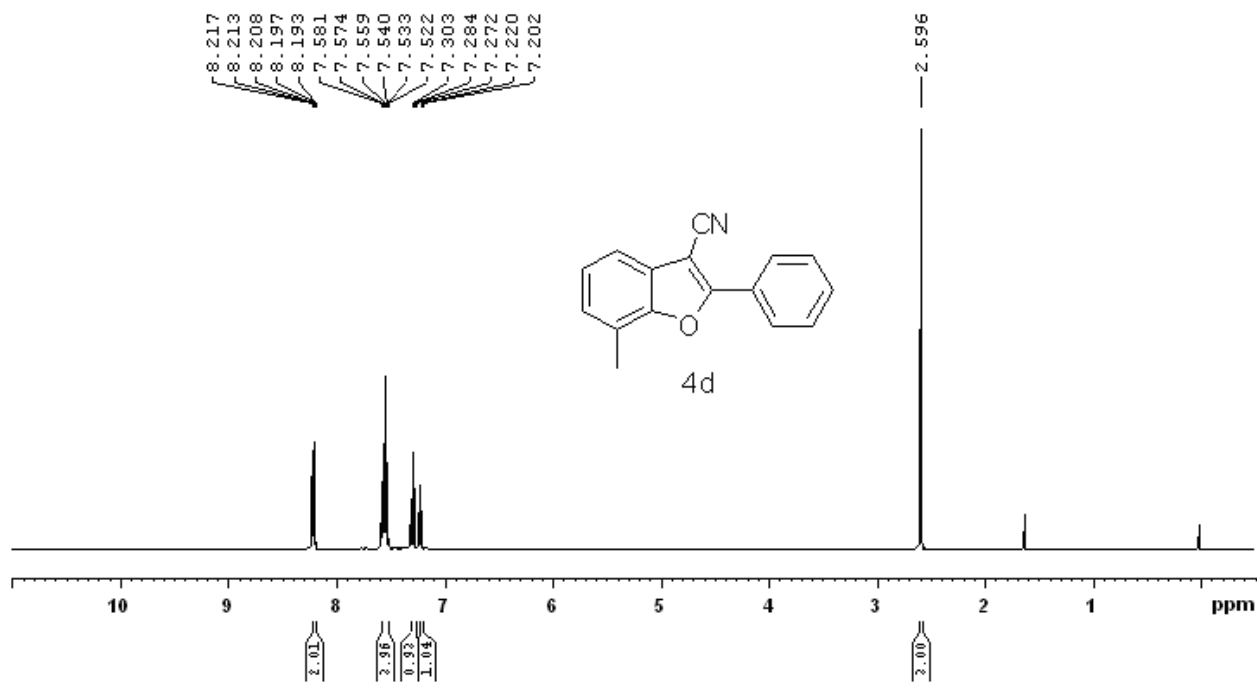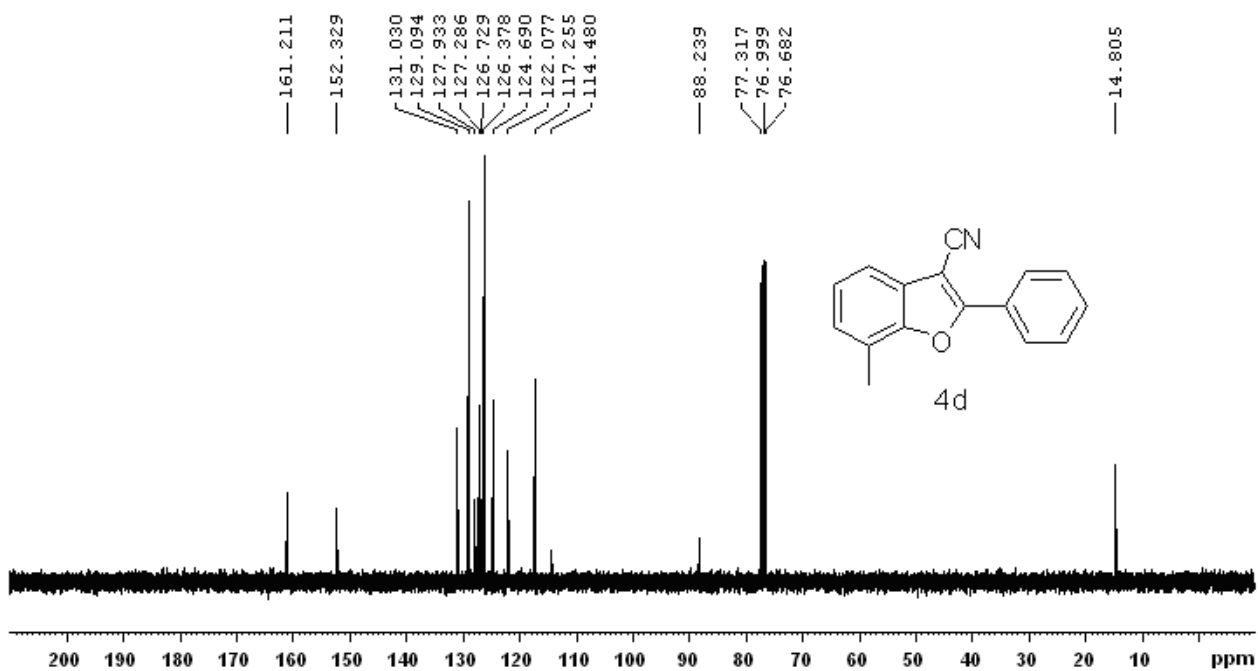

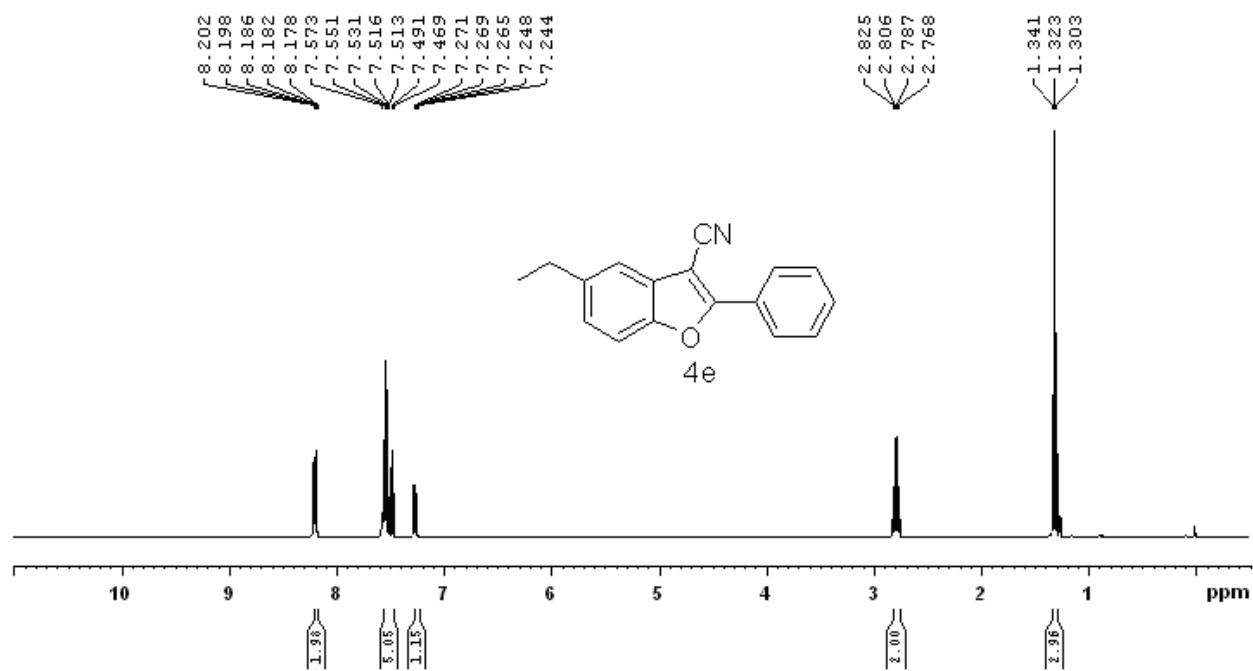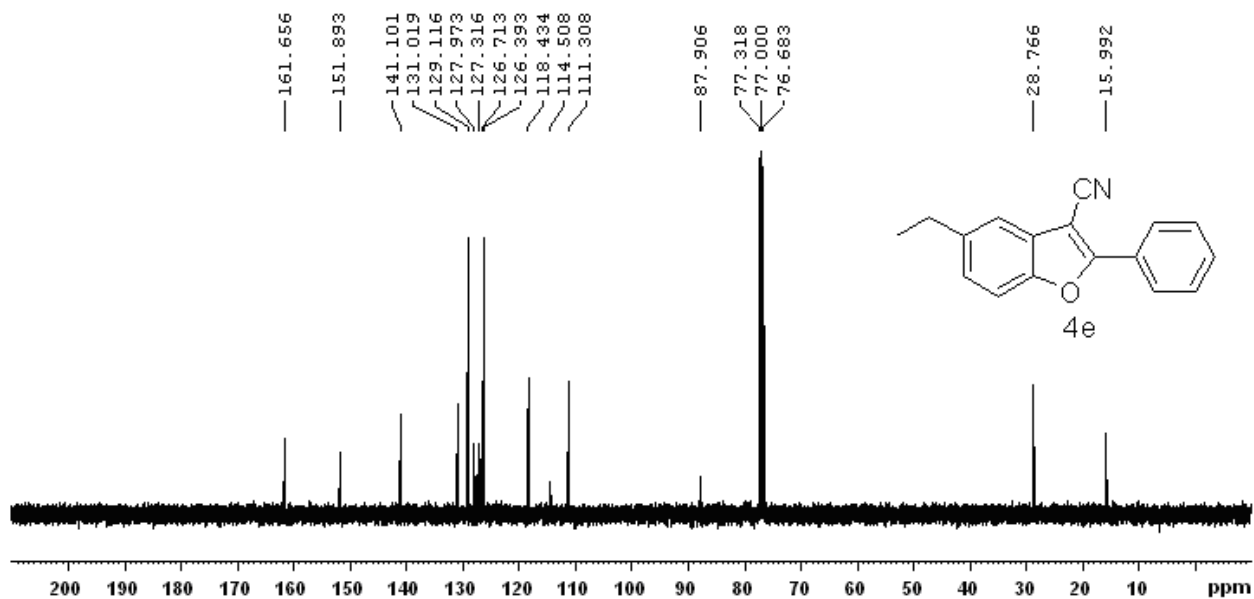

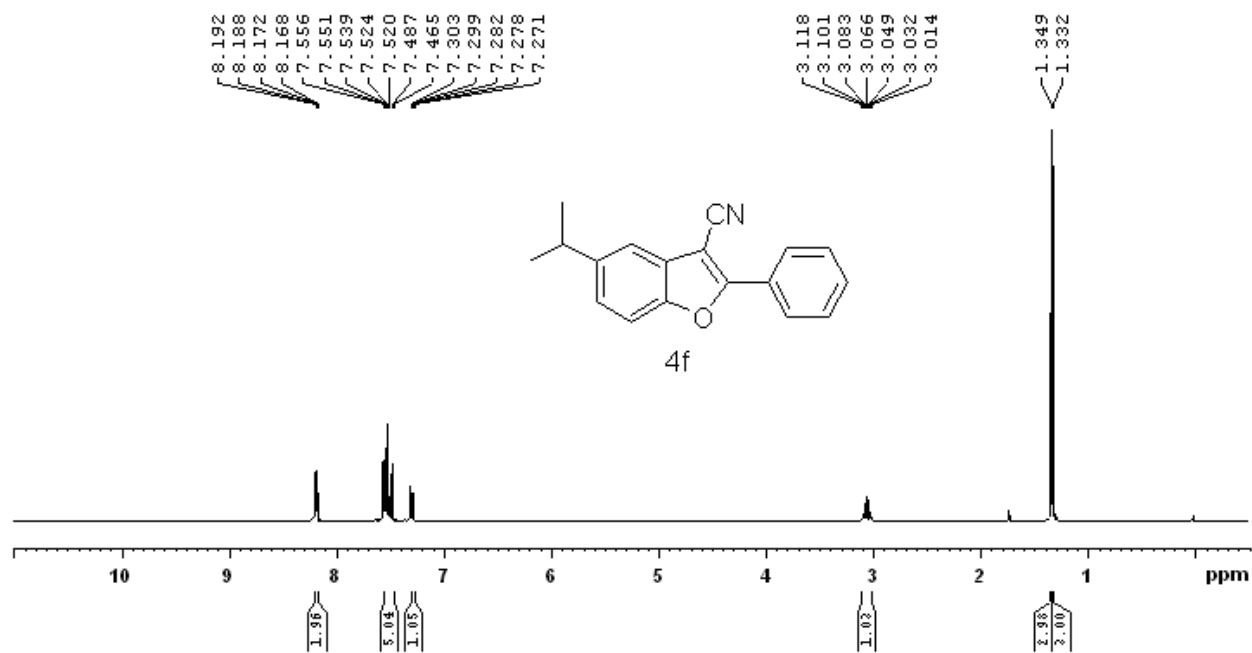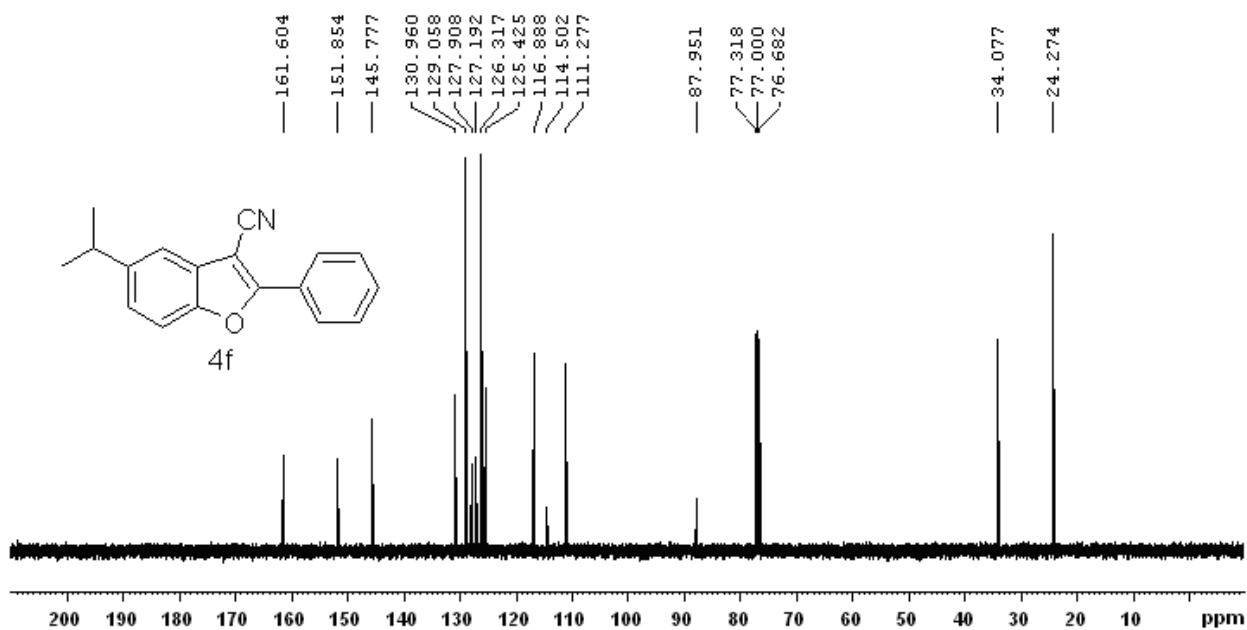

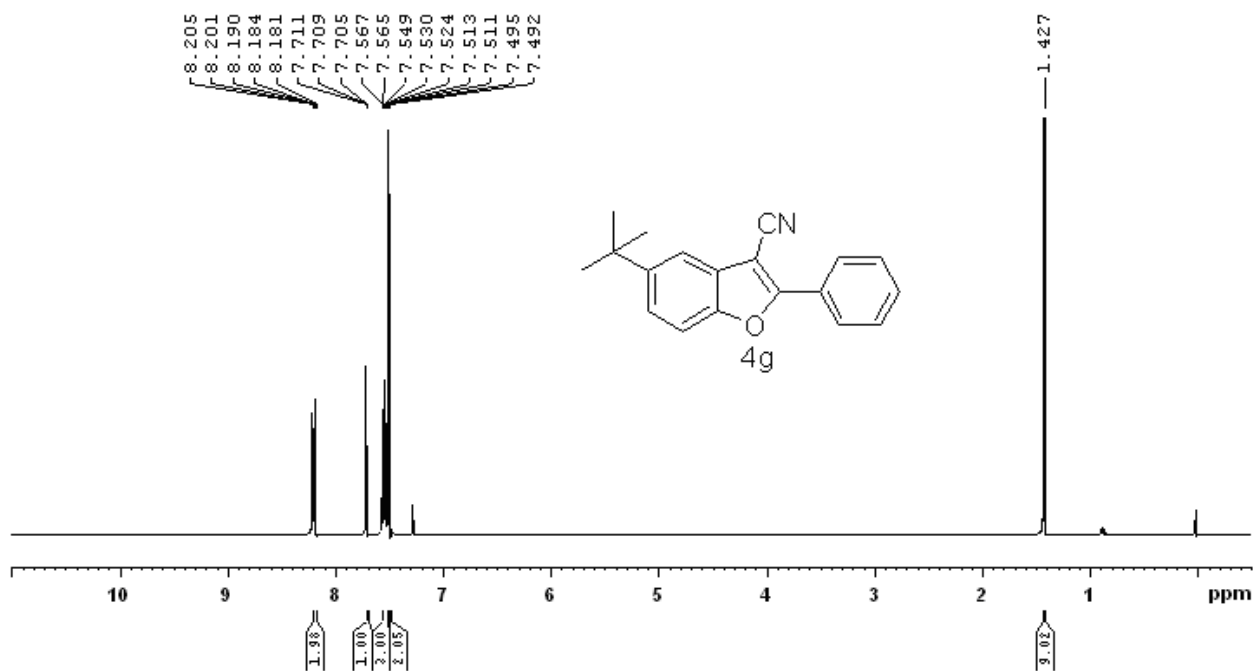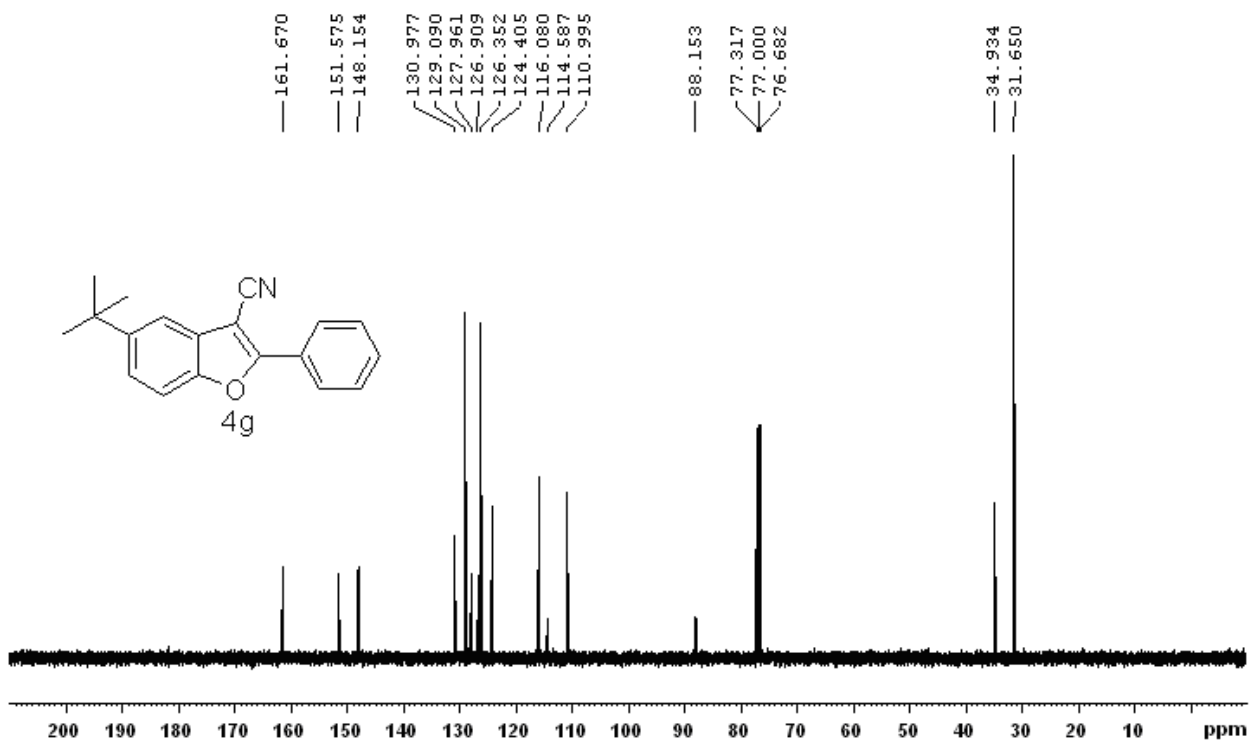

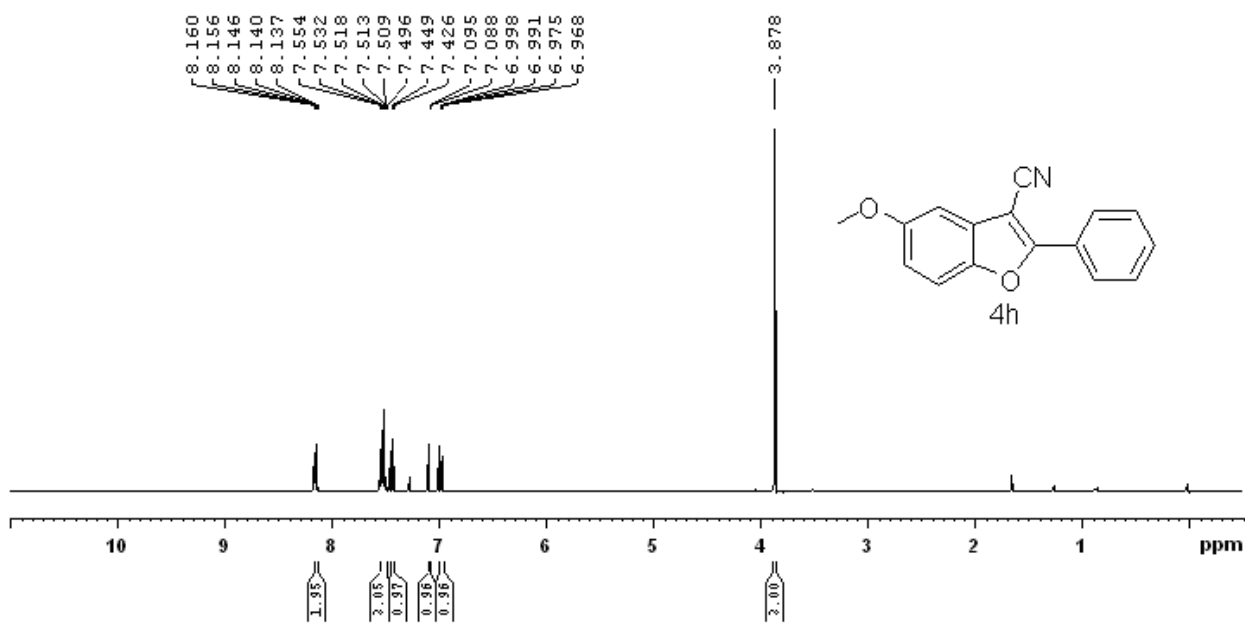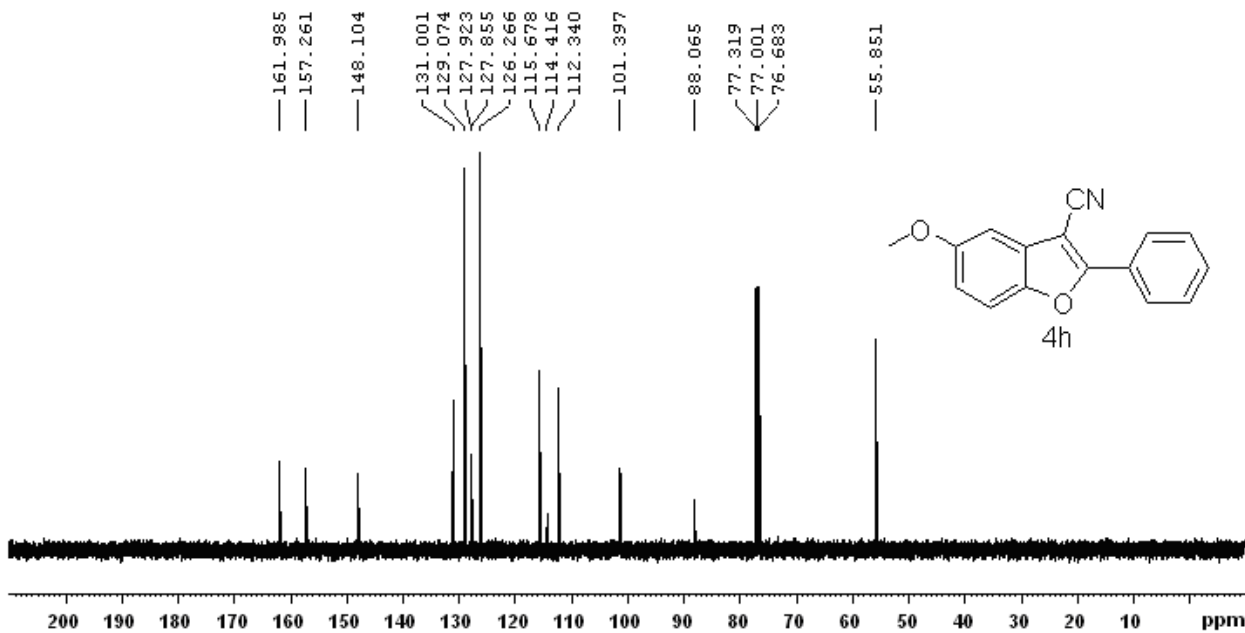



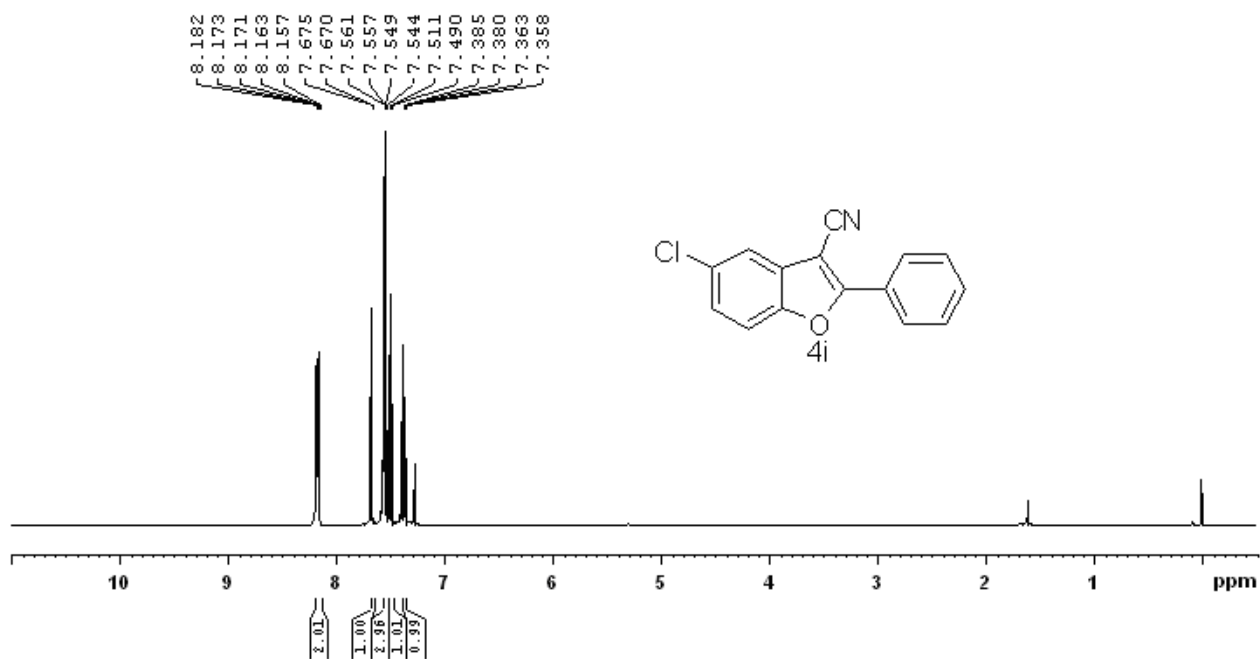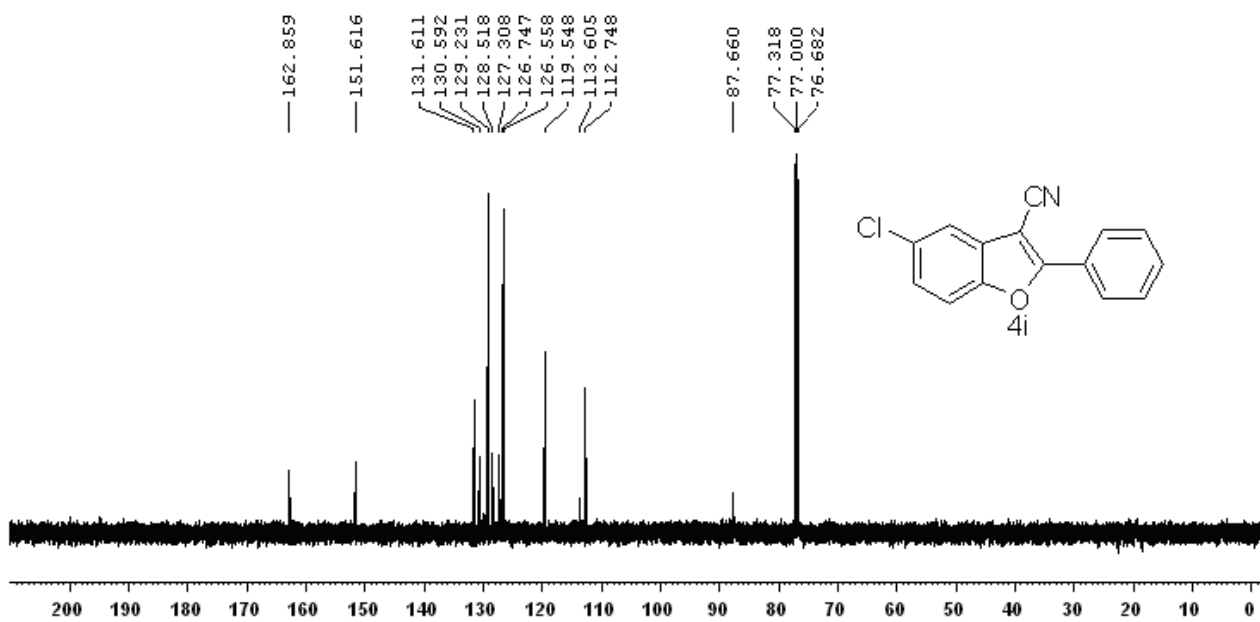

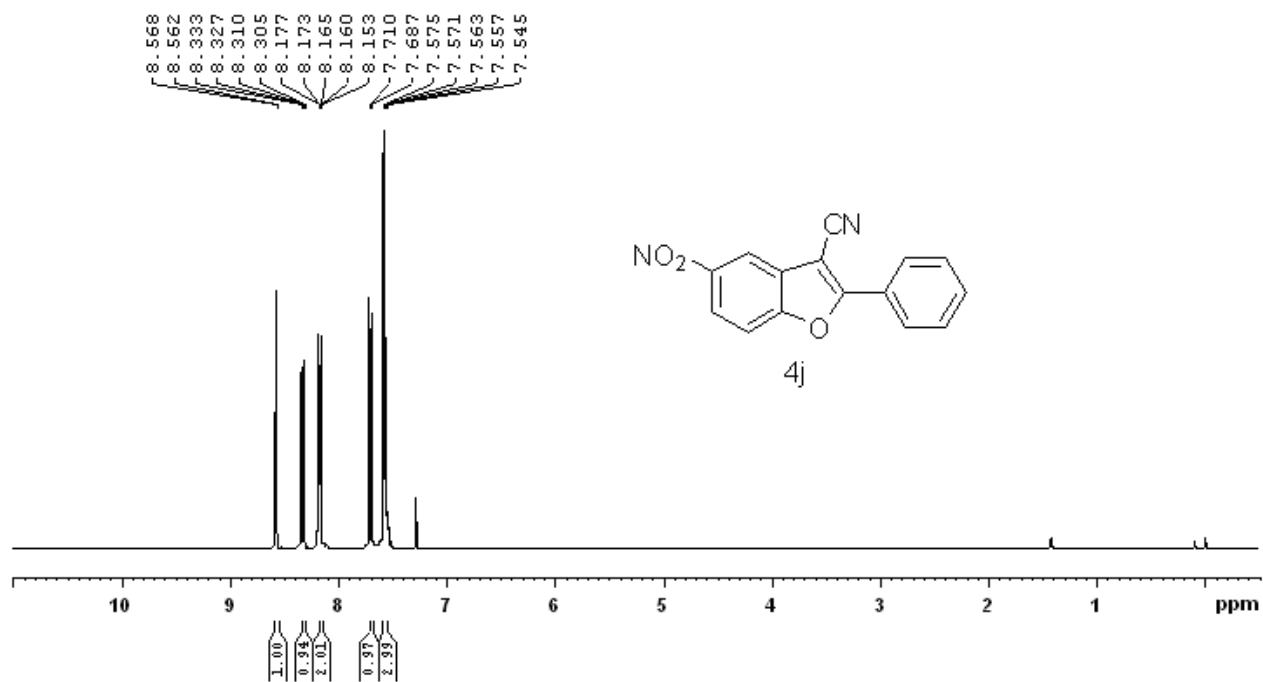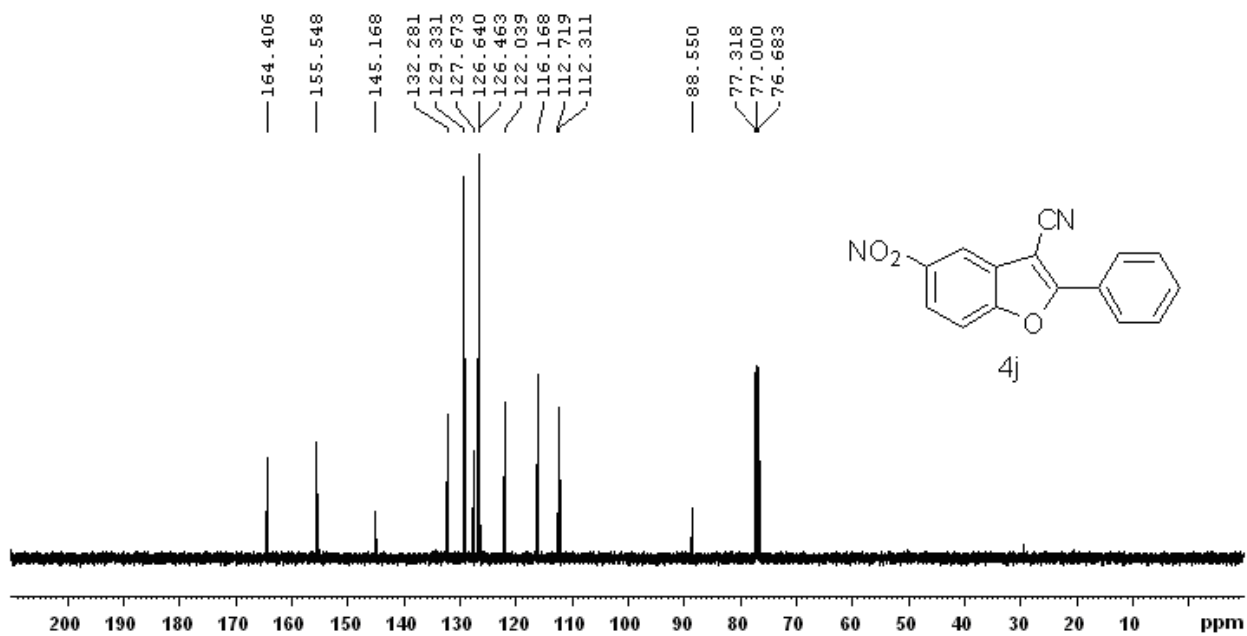

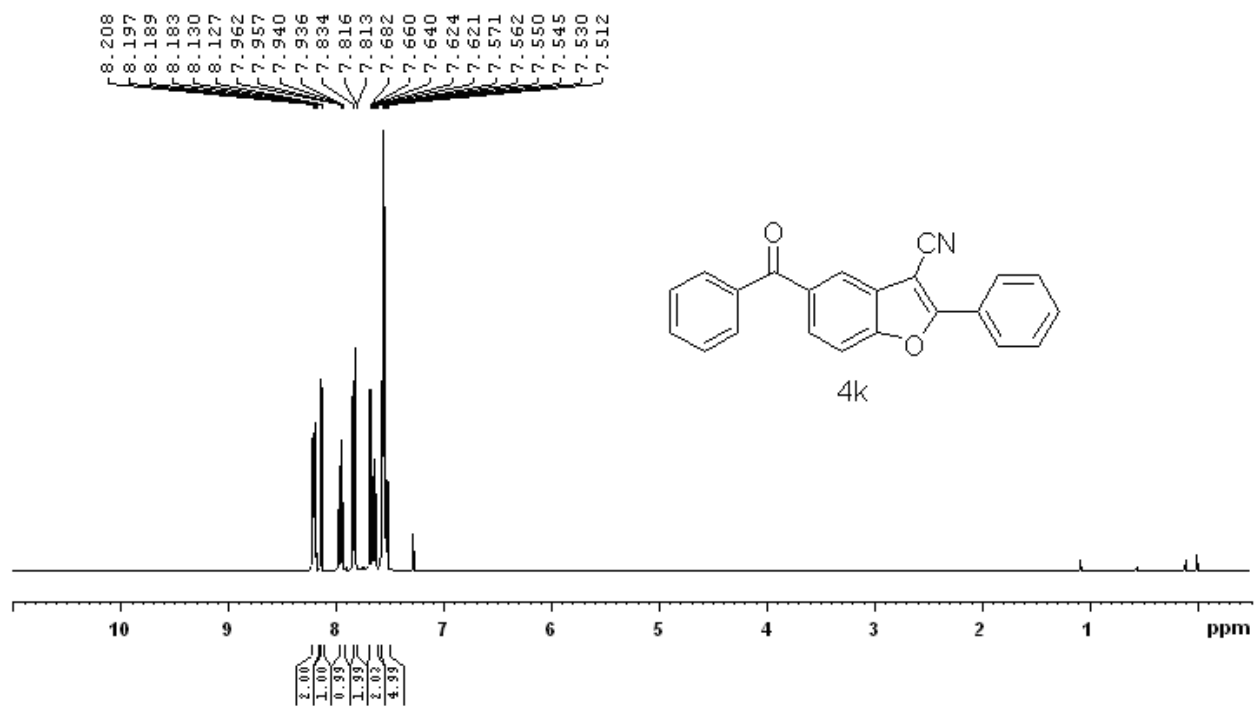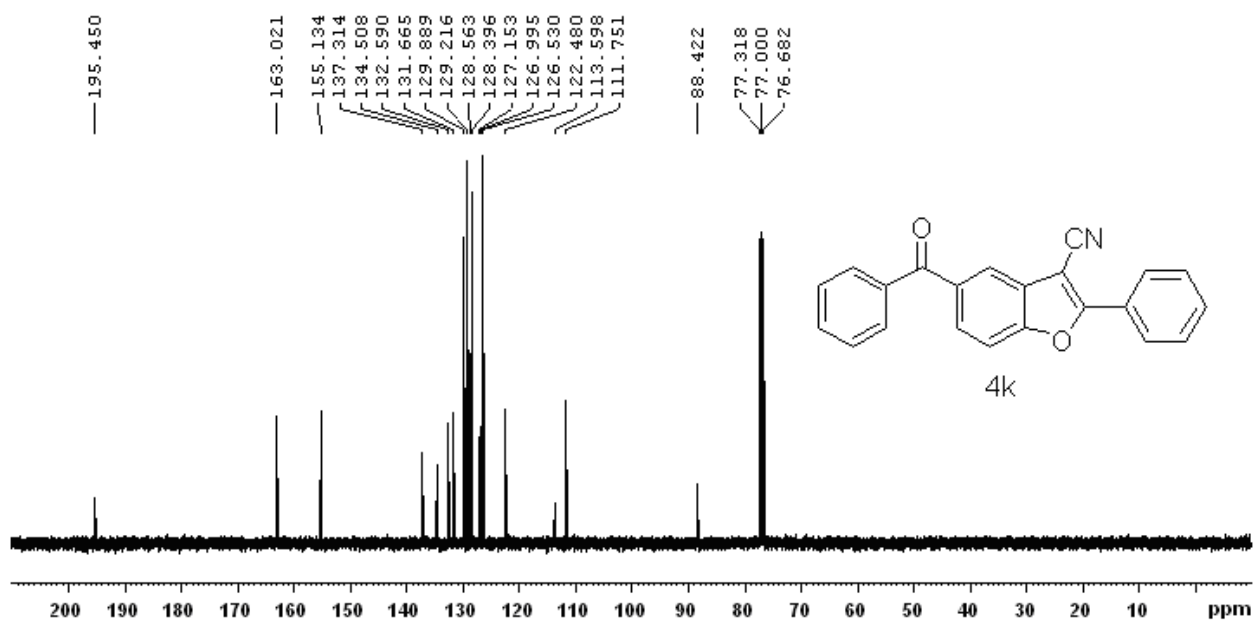

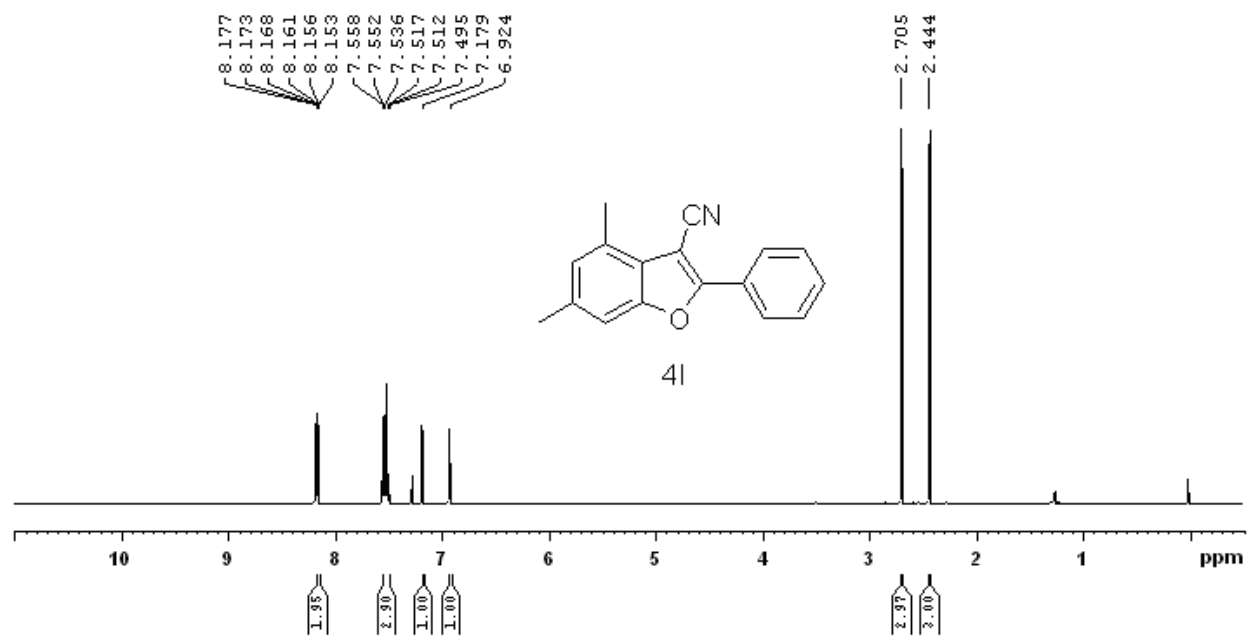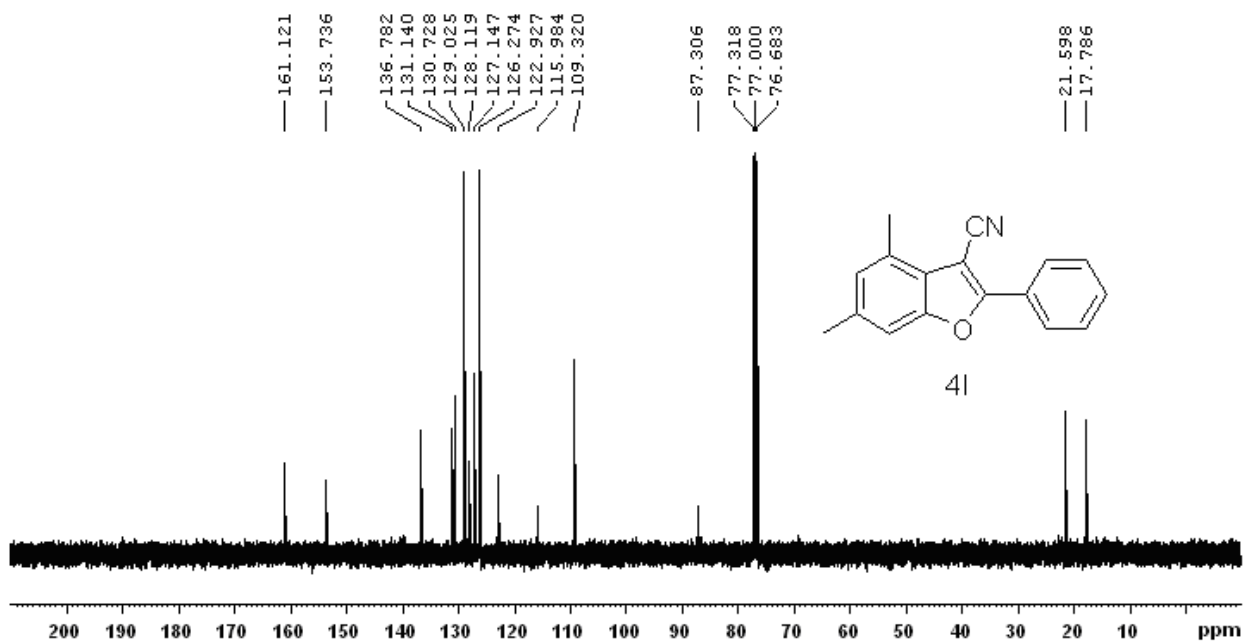

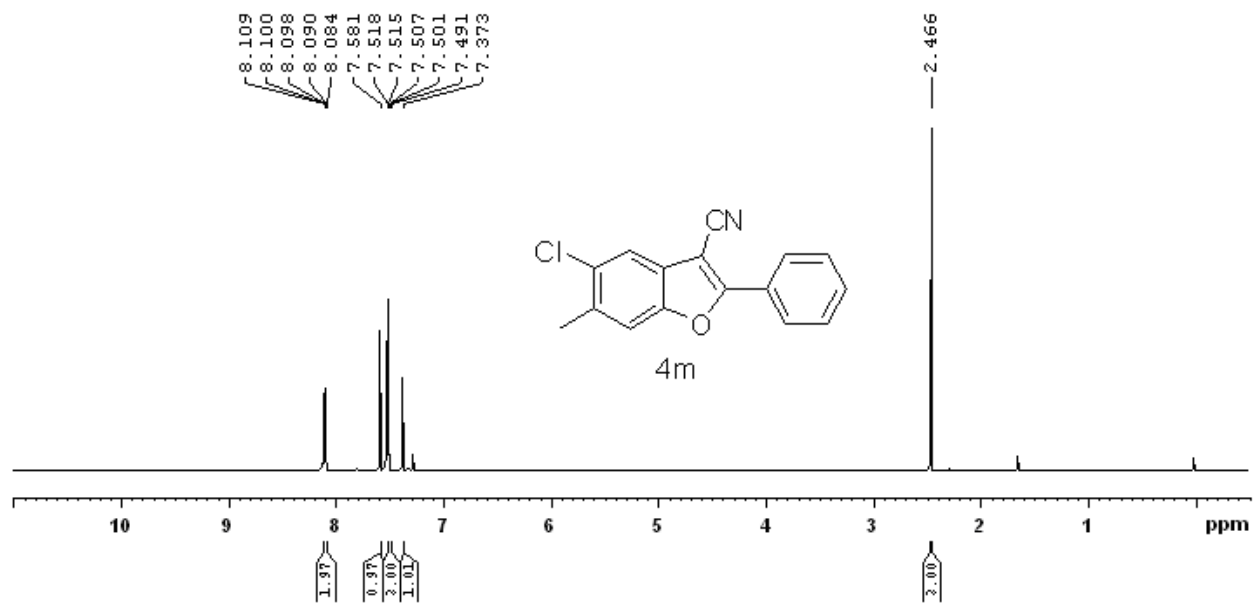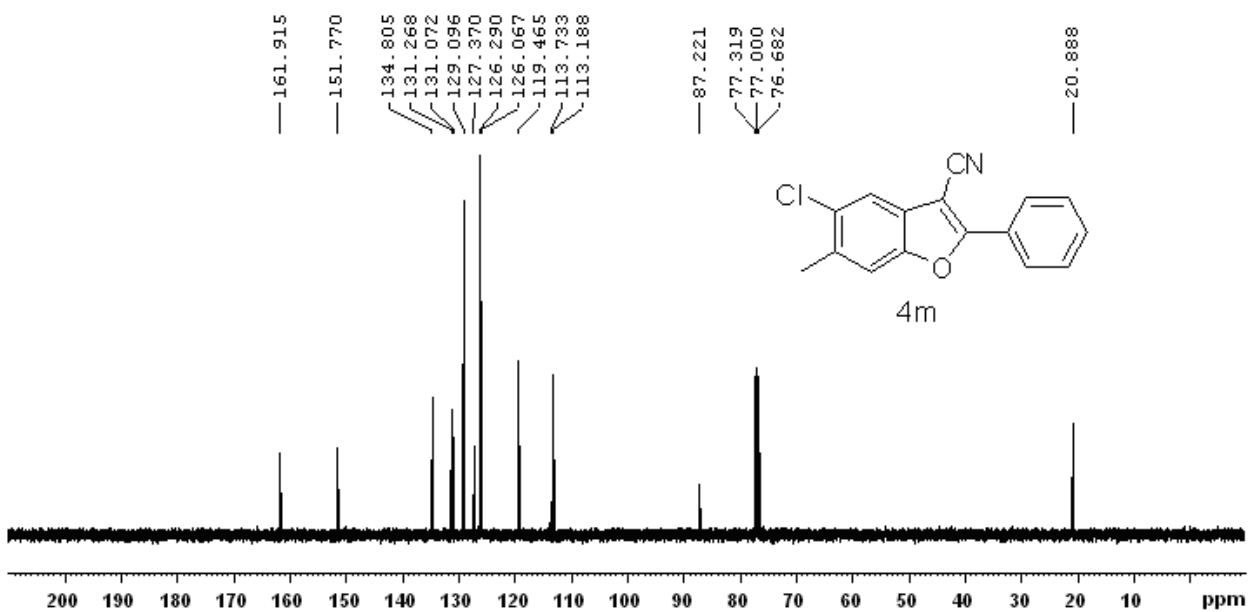

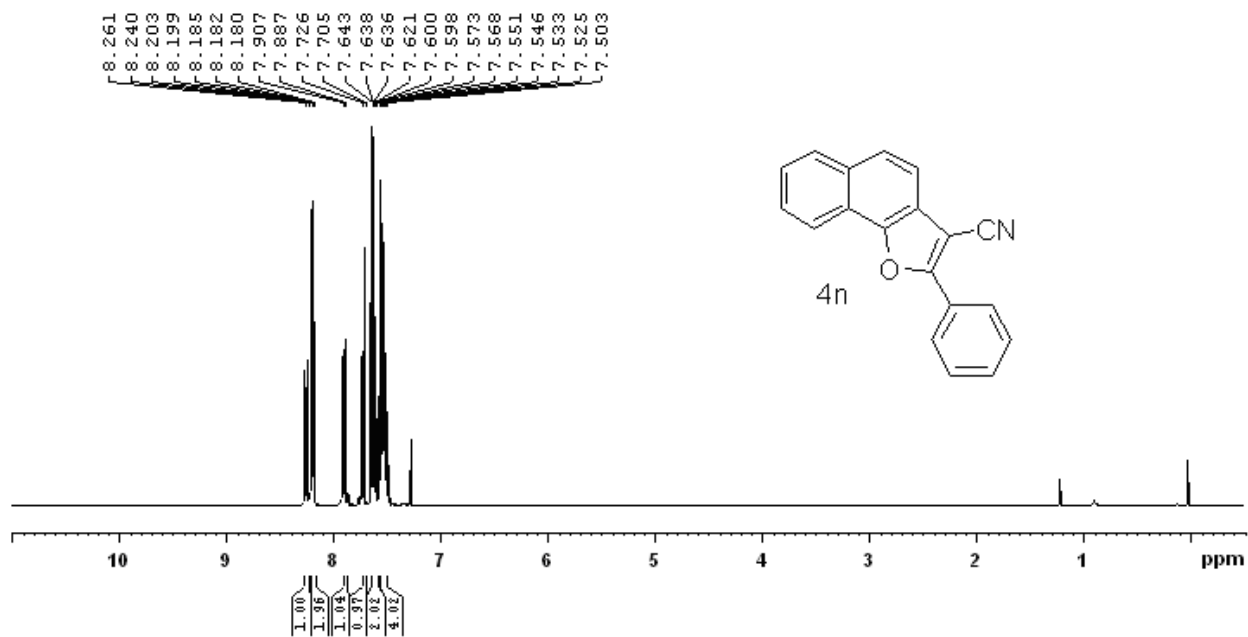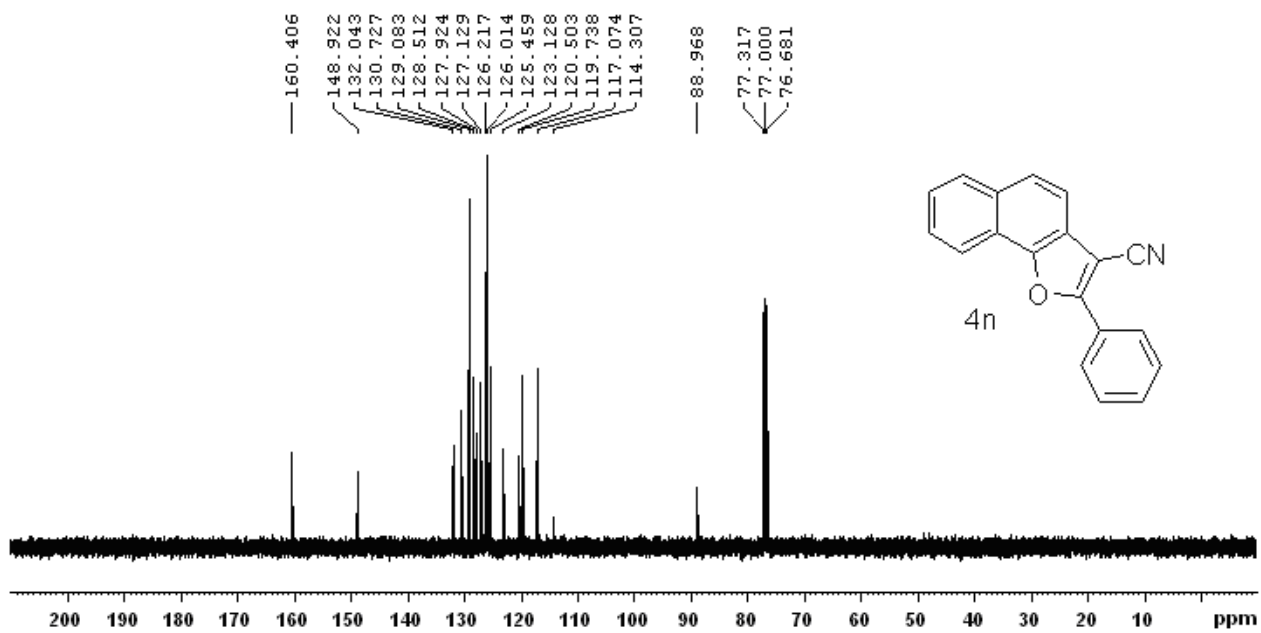

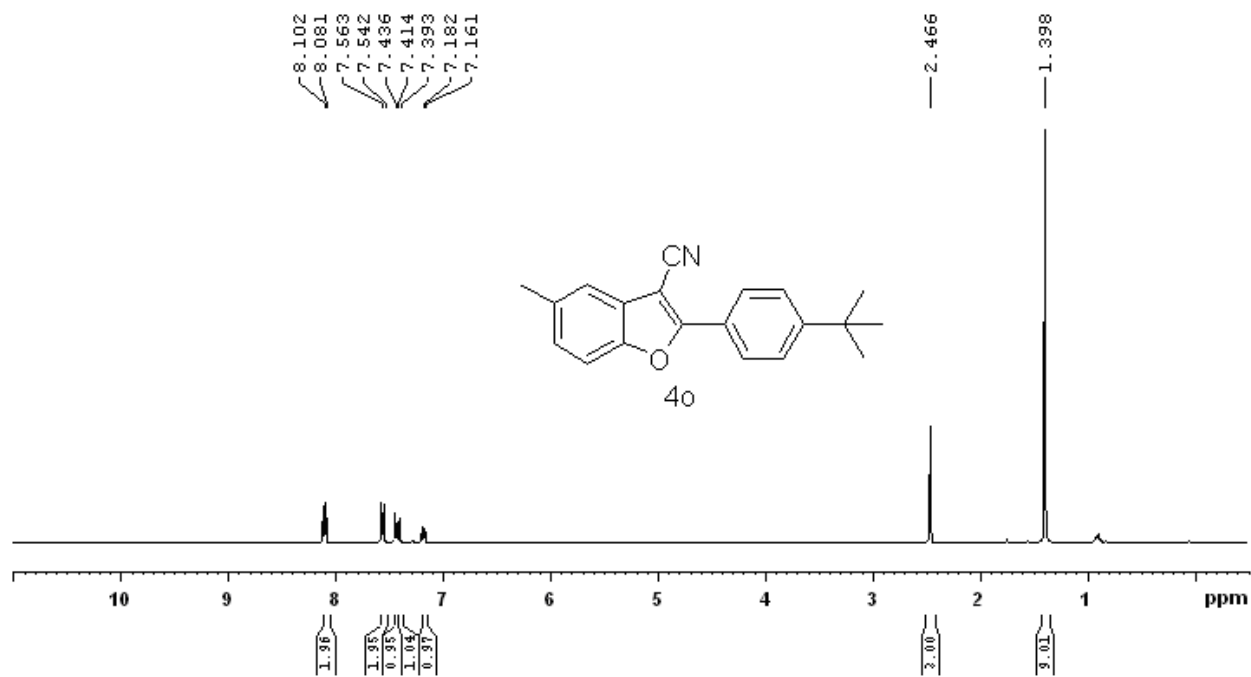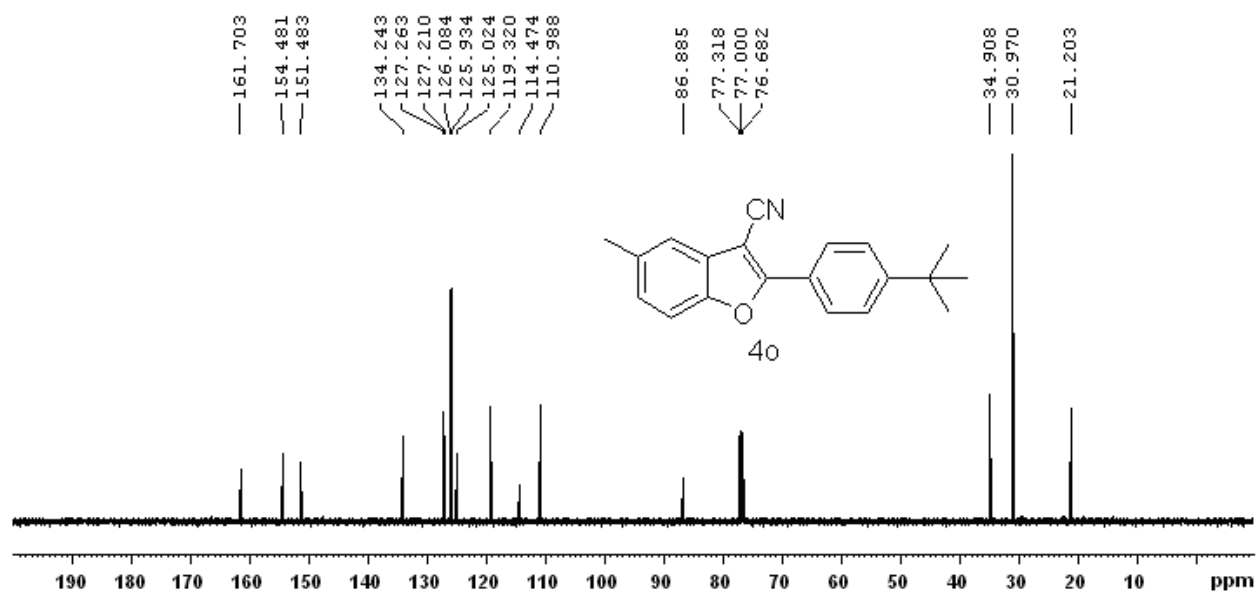

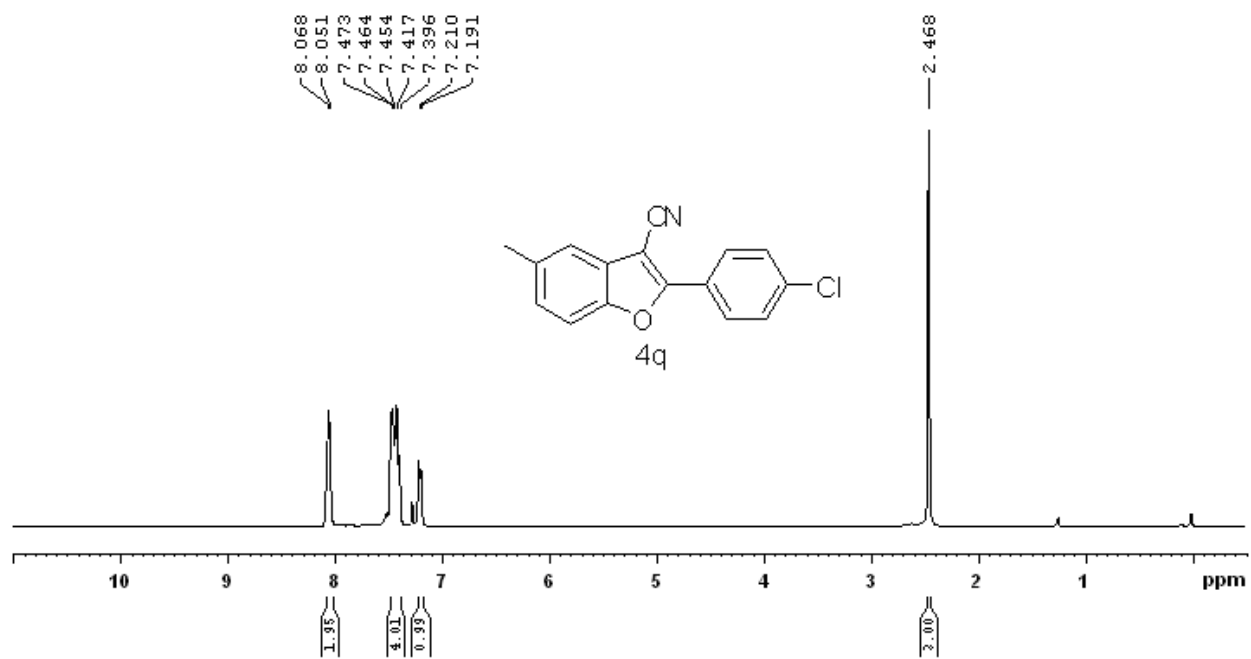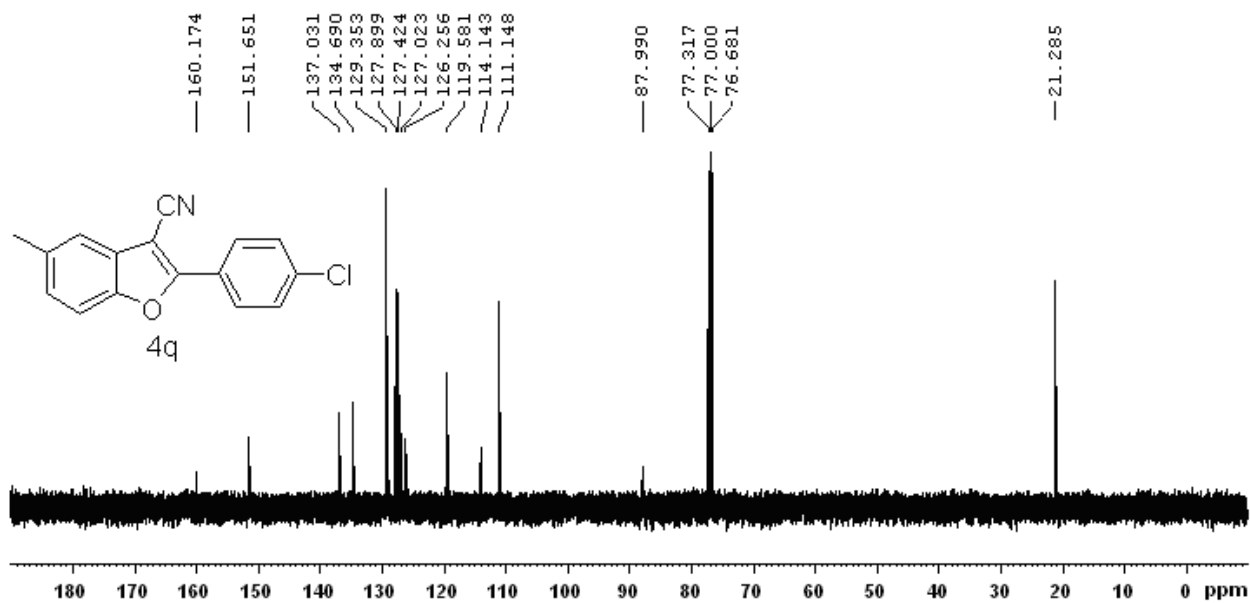



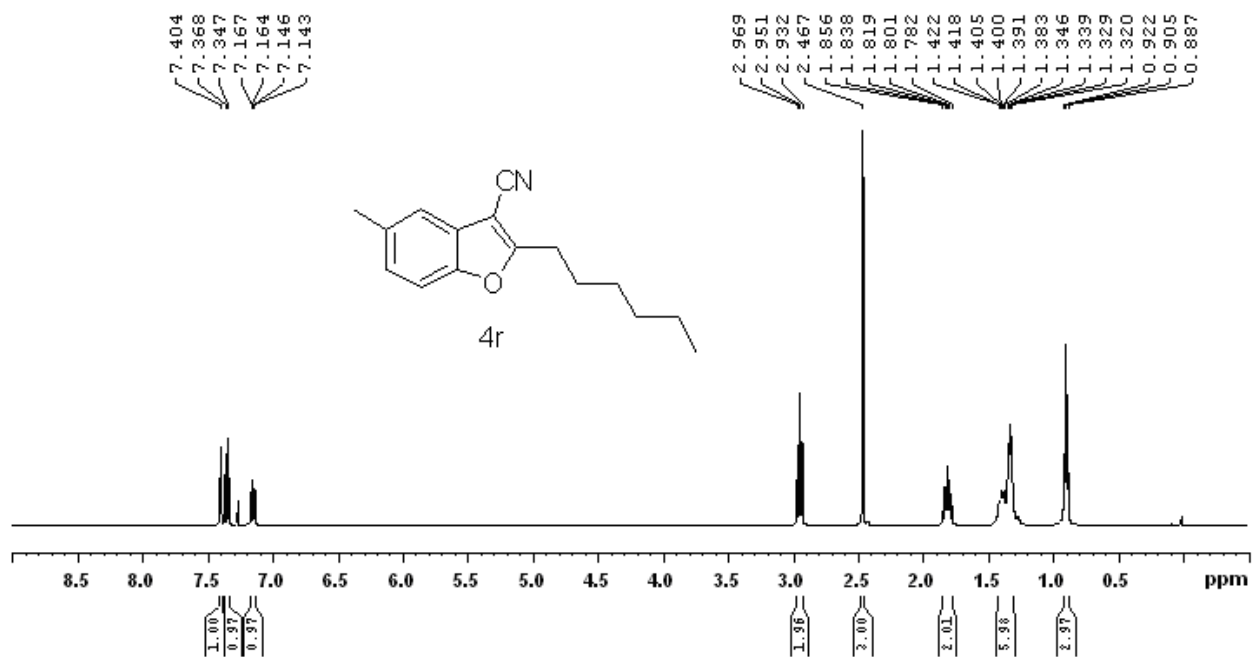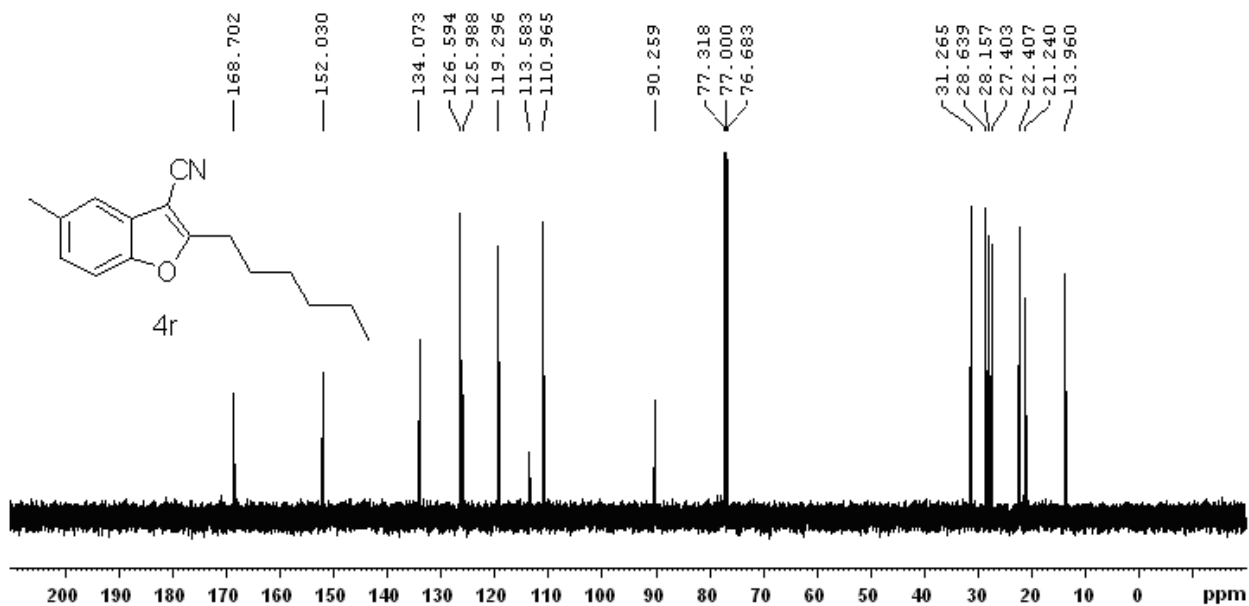

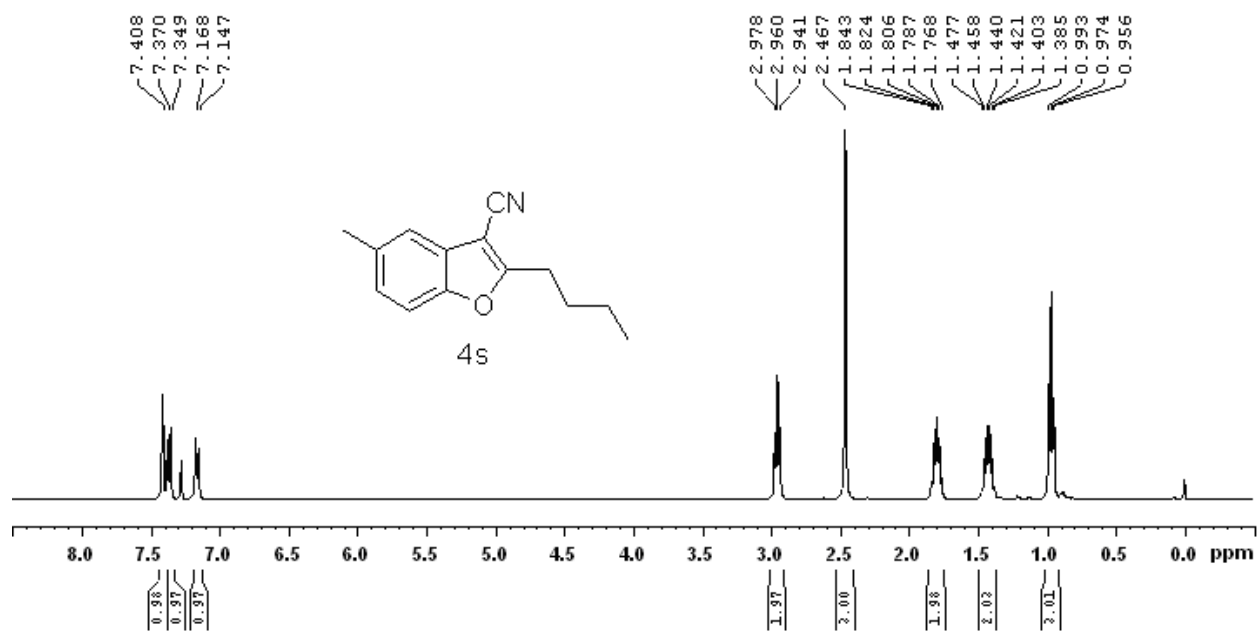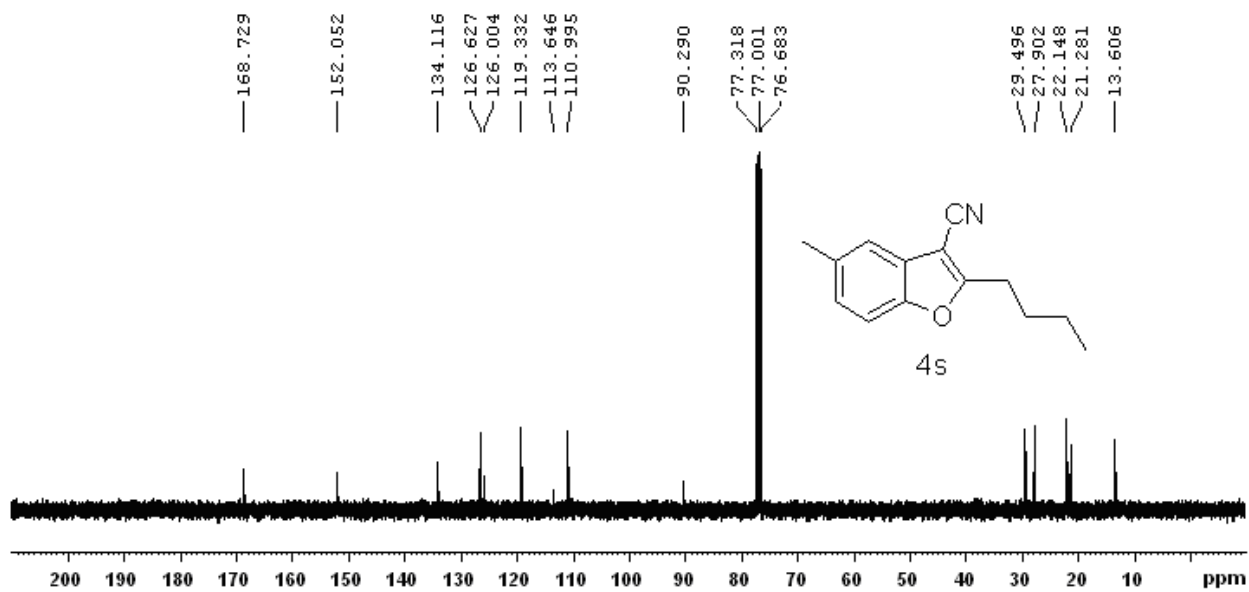

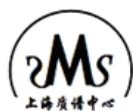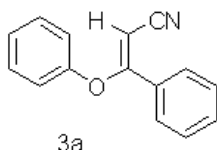

Shanghai Mass Spectrometry Center  
 Shanghai Institute of Organic Chemistry  
 Chinese Academic of Sciences  
 High Resolution MS Data Report

| Instrument: Waters Micromass GCT Premier                                                                    |            | Ionisation Mode: EI+ |      | Electron Energy: 70eV |       |                             |
|-------------------------------------------------------------------------------------------------------------|------------|----------------------|------|-----------------------|-------|-----------------------------|
| Card Serial Number: GCT-P-T11-12-0S0912 <sup>+</sup>                                                        |            |                      |      |                       |       |                             |
| Sample Serial Number: HBSF-D28-S1 <sup>+</sup>                                                              |            |                      |      |                       |       |                             |
| Operator: Li <sup>+</sup>                                                                                   |            |                      |      |                       |       |                             |
| Date: 2011/12/15 <sup>+</sup>                                                                               |            |                      |      |                       |       |                             |
| Elemental Composition Report <sup>+</sup>                                                                   |            |                      |      |                       |       |                             |
| Single Mass Analysis <sup>+</sup>                                                                           |            |                      |      |                       |       |                             |
| Tolerance = 5.0 PPM / DBE: min = -1.5, max = 50.0 <sup>+</sup>                                              |            |                      |      |                       |       |                             |
| Element prediction: Off <sup>+</sup>                                                                        |            |                      |      |                       |       |                             |
| Monoisotopic Mass, Odd and Even Electron Ions <sup>+</sup>                                                  |            |                      |      |                       |       |                             |
| 295 formula(e) evaluated with 3 results within limits (all results (up to 1000) for each mass) <sup>+</sup> |            |                      |      |                       |       |                             |
| Elements Used: C: 0-60 H: 0-80 N: 0-4 O: 0-6 S: 0-1 Br: 0-1 <sup>+</sup>                                    |            |                      |      |                       |       |                             |
| Minimum: -1.5 <sup>+</sup>                                                                                  |            |                      |      |                       |       |                             |
| Maximum: 2.0 5.0 50.0 <sup>+</sup>                                                                          |            |                      |      |                       |       |                             |
| Mass                                                                                                        | Calc. Mass | mDa                  | PPM  | DBE                   | i-FIT | Formula <sup>+</sup>        |
| 221.0840                                                                                                    | 221.0841   | -0.1                 | -0.5 | 11.0                  | 12.1  | C15 H11 N O <sup>+</sup>    |
|                                                                                                             | 221.0834   | 0.6                  | 2.7  | 2.0                   | 494.2 | C7 H15 N3 O3 S <sup>+</sup> |
|                                                                                                             | 221.0848   | -0.8                 | -3.6 | 1.5                   | 522.7 | C9 H17 O4 S <sup>+</sup>    |

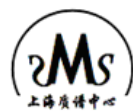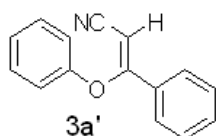

Shanghai Mass Spectrometry Center  
 Shanghai Institute of Organic Chemistry  
 Chinese Academic of Sciences  
 High Resolution MS Data Report

| Instrument: Waters Micromass GCT Premier                                                                    |            | Ionisation Mode: EI+ |      | Electron Energy: 70eV |       |                             |
|-------------------------------------------------------------------------------------------------------------|------------|----------------------|------|-----------------------|-------|-----------------------------|
| Card Serial Number: GCT-P-T11-12-0S0913 <sup>+</sup>                                                        |            |                      |      |                       |       |                             |
| Sample Serial Number: HBSF-D28-S2 <sup>+</sup>                                                              |            |                      |      |                       |       |                             |
| Operator: Li <sup>+</sup>                                                                                   |            |                      |      |                       |       |                             |
| Date: 2011/12/15 <sup>+</sup>                                                                               |            |                      |      |                       |       |                             |
| Elemental Composition Report <sup>+</sup>                                                                   |            |                      |      |                       |       |                             |
| Single Mass Analysis <sup>+</sup>                                                                           |            |                      |      |                       |       |                             |
| Tolerance = 5.0 PPM / DBE: min = -1.5, max = 50.0 <sup>+</sup>                                              |            |                      |      |                       |       |                             |
| Element prediction: Off <sup>+</sup>                                                                        |            |                      |      |                       |       |                             |
| Monoisotopic Mass, Odd and Even Electron Ions <sup>+</sup>                                                  |            |                      |      |                       |       |                             |
| 295 formula(e) evaluated with 3 results within limits (all results (up to 1000) for each mass) <sup>+</sup> |            |                      |      |                       |       |                             |
| Elements Used: C: 0-60 H: 0-80 N: 0-4 O: 0-6 S: 0-1 Br: 0-1 <sup>+</sup>                                    |            |                      |      |                       |       |                             |
| Minimum: -1.5 <sup>+</sup>                                                                                  |            |                      |      |                       |       |                             |
| Maximum: 2.0 5.0 50.0 <sup>+</sup>                                                                          |            |                      |      |                       |       |                             |
| Mass                                                                                                        | Calc. Mass | mDa                  | PPM  | DBE                   | i-FIT | Formula <sup>+</sup>        |
| 221.0842                                                                                                    | 221.0841   | 0.1                  | 0.5  | 11.0                  | 0.9   | C15 H11 N O <sup>+</sup>    |
|                                                                                                             | 221.0848   | -0.6                 | -2.7 | 1.5                   | 331.9 | C9 H17 O4 S <sup>+</sup>    |
|                                                                                                             | 221.0834   | 0.8                  | 3.6  | 2.0                   | 319.4 | C7 H15 N3 O3 S <sup>+</sup> |

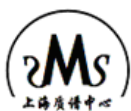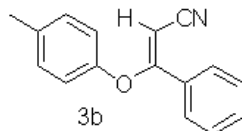

Shanghai Mass Spectrometry Center  
 Shanghai Institute of Organic Chemistry  
 Chinese Academic of Sciences  
 High Resolution MS Data Report

Instrument: Waters Micromass GCT Premier Ionisation Mode: EI+ Electron Energy: 70eV

Card Serial Number: GCT-P-T11-12-OS0918<sup>+</sup>

Sample Serial Number: HBSF-D28-S7<sup>+</sup>

Operator: Li<sup>+</sup>

Date: 2011/12/15<sup>+</sup>

Elemental Composition Report<sup>+</sup>

Single Mass Analysis <sup>+</sup>

Tolerance = 5.0 PPM / DBE: min = -1.5, max = 50.0<sup>+</sup>

Element prediction: Off <sup>+</sup>

Monoisotopic Mass, Odd and Even Electron Ions<sup>+</sup>

325 formula(e) evaluated with 3 results within limits (all results (up to 1000) for each mass)<sup>+</sup>

Elements Used: C: 0-60 H: 0-80 N: 0-4 O: 0-6 S: 0-1 Br: 0-1 <sup>+</sup>

| Mass     | Calc. Mass | mDa  | PPM  | DBE  | i-FIT | Formula <sup>+</sup>        |
|----------|------------|------|------|------|-------|-----------------------------|
| 235.0992 | 235.0991   | 0.1  | 0.4  | 2.0  | 737.5 | C8 H17 N3 O3 S <sup>+</sup> |
|          | 235.0997   | -0.5 | -2.1 | 11.0 | 85.0  | C16 H13 N O <sup>+</sup>    |
|          | 235.0984   | 0.8  | 3.4  | 11.5 | 45.0  | C14 H11 N4 <sup>+</sup>     |

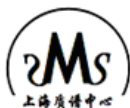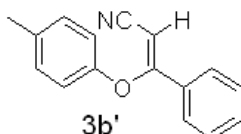

Shanghai Mass Spectrometry Center  
 Shanghai Institute of Organic Chemistry  
 Chinese Academic of Sciences  
 High Resolution MS Data Report

Instrument: Waters Micromass GCT Premier Ionisation Mode: EI+ Electron Energy: 70eV

Card Serial Number: GCT-P-T11-12-OS0919<sup>+</sup>

Sample Serial Number: HBSF-D28-S8<sup>+</sup>

Operator: Li<sup>+</sup>

Date: 2011/12/15<sup>+</sup>

Elemental Composition Report<sup>+</sup>

Single Mass Analysis <sup>+</sup>

Tolerance = 5.0 PPM / DBE: min = -1.5, max = 50.0<sup>+</sup>

Element prediction: Off <sup>+</sup>

Monoisotopic Mass, Odd and Even Electron Ions<sup>+</sup>

325 formula (e) evaluated with 3 results within limits (all results (up to 1000) for each mass)<sup>+</sup>

Elements Used: C: 0-60 H: 0-80 N: 0-4 O: 0-6 S: 0-1 Br: 0-1 <sup>+</sup>

| Mass     | Calc. Mass | mDa  | PPM  | DBE  | i-FIT     | Formula <sup>+</sup>        |
|----------|------------|------|------|------|-----------|-----------------------------|
| 235.1001 | 235.1004   | -0.3 | -1.3 | 1.5  | 2773044.8 | C10 H19 O4 S <sup>+</sup>   |
|          | 235.0997   | 0.4  | 1.7  | 11.0 | 2773015.3 | C16 H13 N O <sup>+</sup>    |
|          | 235.0991   | 1.0  | 4.3  | 2.0  | 2773042.8 | C8 H17 N3 O3 S <sup>+</sup> |

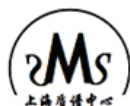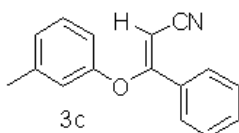

Shanghai Mass Spectrometry Center  
 Shanghai Institute of Organic Chemistry  
 Chinese Academic of Sciences  
 High Resolution MS Data Report

Instrument: Waters Micromass GCT Premier      Ionisation Mode: EI+      Electron Energy: 70eV

Card Serial Number: GCT-P-T11-12-OS0916<sup>+</sup>  
 Sample Serial Number: HBSF-D28-S5<sup>+</sup>  
 Operator: Li<sup>+</sup>  
 Date: 2011/12/15<sup>+</sup>  
 Elemental Composition Report<sup>+</sup>  
 Single Mass Analysis <sup>+</sup>  
 Tolerance = 5.0 PPM / DBE: min = -1.5, max = 50.0<sup>+</sup>  
 Element prediction: Off <sup>+</sup>  
 Monoisotopic Mass, Odd and Even Electron Ions<sup>+</sup>  
 325 formula(e) evaluated with 3 results within limits (all results (up to 1000) for each mass)<sup>+</sup>  
 Elements Used: C: 0-60    H: 0-80    N: 0-4    O: 0-6    S: 0-1    Br: 0-1    <sup>+</sup>

| Mass     | Calc. Mass | mDa  | PPM  | DBE  | i-FIT | Formula <sup>+</sup>        |
|----------|------------|------|------|------|-------|-----------------------------|
| 235.0998 | 235.0997   | 0.1  | 0.4  | 11.0 | 31.4  | C16 H13 N O <sup>+</sup>    |
|          | 235.1004   | -0.6 | -2.6 | 1.5  | 333.5 | C10 H19 O4 S <sup>+</sup>   |
|          | 235.0991   | 0.7  | 3.0  | 2.0  | 316.8 | C8 H17 N3 O3 S <sup>+</sup> |

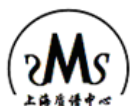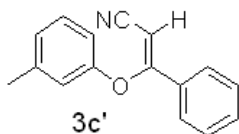

Shanghai Mass Spectrometry Center  
 Shanghai Institute of Organic Chemistry  
 Chinese Academic of Sciences  
 High Resolution MS Data Report

Instrument: Waters Micromass GCT Premier      Ionisation Mode: EI+      Electron Energy: 70eV

Card Serial Number: GCT-P-T11-12-OS0917<sup>+</sup>  
 Sample Serial Number: HBSF-D28-S6<sup>+</sup>  
 Operator: Li<sup>+</sup>  
 Date: 2011/12/15<sup>+</sup>  
 Elemental Composition Report<sup>+</sup>  
 Single Mass Analysis <sup>+</sup>  
 Tolerance = 5.0 PPM / DBE: min = -1.5, max = 50.0<sup>+</sup>  
 Element prediction: Off <sup>+</sup>  
 Monoisotopic Mass, Odd and Even Electron Ions<sup>+</sup>  
 325 formula(e) evaluated with 3 results within limits (all results (up to 1000) for each mass)<sup>+</sup>  
 Elements Used: C: 0-60    H: 0-80    N: 0-4    O: 0-6    S: 0-1    Br: 0-1    <sup>+</sup>

| Mass     | Calc. Mass | mDa  | PPM  | DBE  | i-FIT | Formula <sup>+</sup>        |
|----------|------------|------|------|------|-------|-----------------------------|
| 235.0999 | 235.0997   | 0.2  | 0.9  | 11.0 | 2.9   | C16 H13 N O <sup>+</sup>    |
|          | 235.1004   | -0.5 | -2.1 | 1.5  | 161.9 | C10 H19 O4 S <sup>+</sup>   |
|          | 235.0991   | 0.8  | 3.4  | 2.0  | 153.9 | C8 H17 N3 O3 S <sup>+</sup> |



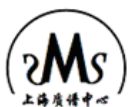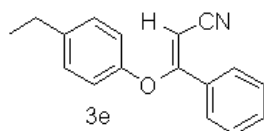

Shanghai Mass Spectrometry Center  
 Shanghai Institute of Organic Chemistry  
 Chinese Academic of Sciences  
 High Resolution MS Data Report

Instrument: Waters Micromass GCT Premier Ionisation Mode: EI+ Electron Energy: 70eV

Card Serial Number: GCT-P-T11-12-0S0962<sup>+</sup>  
 Sample Serial Number: HBSF-LiD21-S1<sup>+</sup>  
 Operator: Li<sup>+</sup>  
 Date: 2011/12/26<sup>+</sup>  
 Elemental Composition Report<sup>+</sup>  
 Single Mass Analysis<sup>+</sup>  
 Tolerance = 5.0 PPM / DBE: min = -1.5, max = 50.0<sup>+</sup>  
 Element prediction: Off<sup>+</sup>  
 Monoisotopic Mass, Odd and Even Electron Ions<sup>+</sup>  
 386 formula(e) evaluated with 4 results within limits (all results (up to 1000) for each mass)<sup>+</sup>  
 Elements Used: C: 0-60 H: 0-80 N: 0-4 O: 0-6 S: 0-1 Cl: 0-1<sup>+</sup>

| Mass     | Calc. Mass | mDa  | PPM  | DBE  | i-FIT     | Formula <sup>+</sup>        |
|----------|------------|------|------|------|-----------|-----------------------------|
| 249.1153 | 249.1154   | -0.1 | -0.4 | 11.0 | 6.7...    | C17 H15 N O <sup>+</sup>    |
|          | 249.1147   | 0.6  | 2.4  | 2.0  | 269.7...  | C9 H19 N3 O3 S <sup>+</sup> |
|          | 249.1159   | -0.6 | -2.4 | 6.5  | 2310.1... | C14 H18 N2 C1 <sup>+</sup>  |
|          | 249.1161   | -0.8 | -3.2 | 1.5  | 285.9...  | C11 H21 O4 S <sup>+</sup>   |

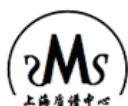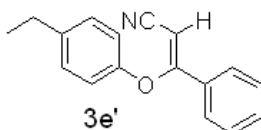

Shanghai Mass Spectrometry Center  
 Shanghai Institute of Organic Chemistry  
 Chinese Academic of Sciences  
 High Resolution MS Data Report

Instrument: Waters Micromass GCT Premier Ionisation Mode: EI+ Electron Energy: 70eV

Card Serial Number: GCT-P-T11-12-0S0963<sup>+</sup>  
 Sample Serial Number: HBSF-LiD21-S2<sup>+</sup>  
 Operator: Li<sup>+</sup>  
 Date: 2011/12/26<sup>+</sup>  
 Elemental Composition Report<sup>+</sup>  
 Single Mass Analysis<sup>+</sup>  
 Tolerance = 5.0 PPM / DBE: min = -1.5, max = 50.0<sup>+</sup>  
 Element prediction: Off<sup>+</sup>  
 Monoisotopic Mass, Odd and Even Electron Ions<sup>+</sup>  
 386 formula(e) evaluated with 5 results within limits (all results (up to 1000) for each mass)<sup>+</sup>  
 Elements Used: C: 0-60 H: 0-80 N: 0-4 O: 0-6 S: 0-1 Cl: 0-1<sup>+</sup>

| Mass     | Calc. Mass | mDa  | PPM  | DBE  | i-FIT     | Formula <sup>+</sup>        |
|----------|------------|------|------|------|-----------|-----------------------------|
| 249.1152 | 249.1154   | -0.2 | -0.8 | 11.0 | 10.1...   | C17 H15 N O <sup>+</sup>    |
|          | 249.1147   | 0.5  | 2.0  | 2.0  | 220.7...  | C9 H19 N3 O3 S <sup>+</sup> |
|          | 249.1159   | -0.7 | -2.8 | 6.5  | 1147.1... | C14 H18 N2 C1 <sup>+</sup>  |
|          | 249.1161   | -0.9 | -3.6 | 1.5  | 235.4...  | C11 H21 O4 S <sup>+</sup>   |
|          | 249.1140   | 1.2  | 4.8  | 11.5 | 3.6...    | C15 H13 N4 <sup>+</sup>     |

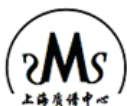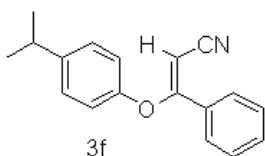

Shanghai Mass Spectrometry Center  
 Shanghai Institute of Organic Chemistry  
 Chinese Academic of Sciences  
 High Resolution MS Data Report

Instrument: Waters Micromass GCT Premier Ionisation Mode: EI+ Electron Energy: 70eV

Card Serial Number: GCT-P-T11-12-OS0964

Sample Serial Number: HBSF-LiD21-S3

Operator: Li

Date: 2011/12/26

Elemental Composition Report

Single Mass Analysis

Tolerance = 5.0 PPM / DBE: min = -1.5, max = 50.0

Element prediction: Off

Monoisotopic Mass, Odd and Even Electron Ions

414 formula(e) evaluated with 5 results within limits (all results (up to 1000) for each mass)

Elements Used: C: 0-60 H: 0-80 N: 0-4 O: 0-6 S: 0-1 Cl: 0-1

Minimum:

Maximum: 2.0 5.0 -1.5 50.0

| Mass     | Calc. Mass | mDa  | PPM  | DBE  | i-FIT  | Formula         |
|----------|------------|------|------|------|--------|-----------------|
| 263.1307 | 263.1304   | 0.3  | 1.1  | 2.0  | 788.6  | C10 H21 N3 O3 S |
|          | 263.1310   | -0.3 | -1.1 | 11.0 | 5.9    | C18 H17 N O     |
|          | 263.1315   | -0.8 | -3.0 | 6.5  | 7713.5 | C15 H20 N2 C1   |
|          | 263.1317   | -1.0 | -3.8 | 1.5  | 823.2  | C12 H23 O4 S    |
|          | 263.1297   | 1.0  | 3.8  | 11.5 | 11.3   | C16 H15 N4      |

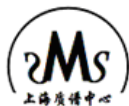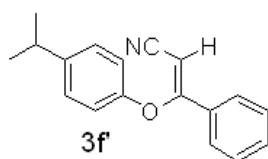

Shanghai Mass Spectrometry Center  
 Shanghai Institute of Organic Chemistry  
 Chinese Academic of Sciences  
 High Resolution MS Data Report

Instrument: Waters Micromass GCT Premier Ionisation Mode: EI+ Electron Energy: 70eV

Card Serial Number: GCT-P-T11-12-OS0965

Sample Serial Number: HBSF-LiD21-S4

Operator: Li

Date: 2011/12/26

Elemental Composition Report

Single Mass Analysis

Tolerance = 5.0 PPM / DBE: min = -1.5, max = 50.0

Element prediction: Off

Monoisotopic Mass, Odd and Even Electron Ions

414 formula(e) evaluated with 5 results within limits (all results (up to 1000) for each mass)

Elements Used: C: 0-60 H: 0-80 N: 0-4 O: 0-6 S: 0-1 Cl: 0-1

Minimum:

Maximum: 2.0 5.0 -1.5 50.0

| Mass     | Calc. Mass | mDa  | PPM  | DBE  | i-FIT  | Formula         |
|----------|------------|------|------|------|--------|-----------------|
| 263.1309 | 263.1310   | -0.1 | -0.4 | 11.0 | 5.1    | C18 H17 N O     |
|          | 263.1304   | 0.5  | 1.9  | 2.0  | 174.4  | C10 H21 N3 O3 S |
|          | 263.1315   | -0.6 | -2.3 | 6.5  | 1125.6 | C15 H20 N2 C1   |
|          | 263.1317   | -0.8 | -3.0 | 1.5  | 184.6  | C12 H23 O4 S    |
|          | 263.1297   | 1.2  | 4.6  | 11.5 | 2.6    | C16 H15 N4      |



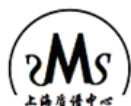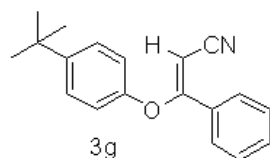

Shanghai Mass Spectrometry Center  
 Shanghai Institute of Organic Chemistry  
 Chinese Academic of Sciences  
 High Resolution MS Data Report

|                                                                                                             |            |                      |      |                       |              |                              |
|-------------------------------------------------------------------------------------------------------------|------------|----------------------|------|-----------------------|--------------|------------------------------|
| Instrument: Waters Micromass GCT Premier                                                                    |            | Ionisation Mode: EI+ |      | Electron Energy: 70eV |              |                              |
| Card Serial Number: GCT-P-T11-12-OSD968 <sup>+</sup>                                                        |            |                      |      |                       |              |                              |
| Sample Serial Number: HBSF-LiD21-S7 <sup>+</sup>                                                            |            |                      |      |                       |              |                              |
| Operator: Li <sup>+</sup>                                                                                   |            |                      |      |                       |              |                              |
| Date: 2011/12/26 <sup>+</sup>                                                                               |            |                      |      |                       |              |                              |
| Elemental Composition Report <sup>+</sup>                                                                   |            |                      |      |                       |              |                              |
| Single Mass Analysis <sup>+</sup>                                                                           |            |                      |      |                       |              |                              |
| Tolerance = 5.0 PPM / DBE: min = -1.5, max = 50.0 <sup>+</sup>                                              |            |                      |      |                       |              |                              |
| Element prediction: Off <sup>+</sup>                                                                        |            |                      |      |                       |              |                              |
| Monoisotopic Mass, Odd and Even Electron Ions <sup>+</sup>                                                  |            |                      |      |                       |              |                              |
| 434 formula(e) evaluated with 4 results within limits (all results (up to 1000) for each mass) <sup>+</sup> |            |                      |      |                       |              |                              |
| Elements Used: C: 0-60 H: 0-80 N: 0-4 O: 0-6 S: 0-1 Cl: 0-1 <sup>+</sup>                                    |            |                      |      |                       |              |                              |
| Minimum: -1.5 <sup>+</sup>                                                                                  |            |                      |      |                       |              |                              |
| Maximum: 50.0 <sup>+</sup>                                                                                  |            |                      |      |                       |              |                              |
| Mass                                                                                                        | Calc. Mass | mDa                  | PPM  | DBE                   | i-FIT        | Formula <sup>+</sup>         |
| 277.1473                                                                                                    | 277.1474   | -0.1                 | -0.4 | 1.5                   | 2776115.8... | C13 H25 O4 S <sup>+</sup>    |
|                                                                                                             | 277.1472   | 0.1                  | 0.4  | 6.5                   | 2776279.3... | C16 H22 N2 Cl <sup>+</sup>   |
|                                                                                                             | 277.1467   | 0.6                  | 2.2  | 11.0                  | 2775363.0... | C19 H19 N O <sup>+</sup>     |
|                                                                                                             | 277.1460   | 1.3                  | 4.7  | 2.0                   | 2776100.0... | C11 H23 N3 O3 S <sup>+</sup> |

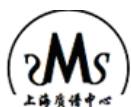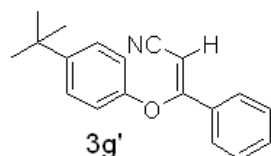

Shanghai Mass Spectrometry Center  
 Shanghai Institute of Organic Chemistry  
 Chinese Academic of Sciences  
 High Resolution MS Data Report

|                                                                                                             |            |                      |      |                       |              |                              |
|-------------------------------------------------------------------------------------------------------------|------------|----------------------|------|-----------------------|--------------|------------------------------|
| Instrument: Waters Micromass GCT Premier                                                                    |            | Ionisation Mode: EI+ |      | Electron Energy: 70eV |              |                              |
| Card Serial Number: GCT-P-T11-12-OS0969 <sup>+</sup>                                                        |            |                      |      |                       |              |                              |
| Sample Serial Number: HBSF-LiD21-S8 <sup>+</sup>                                                            |            |                      |      |                       |              |                              |
| Operator: Li <sup>+</sup>                                                                                   |            |                      |      |                       |              |                              |
| Date: 2011/12/26 <sup>+</sup>                                                                               |            |                      |      |                       |              |                              |
| Elemental Composition Report <sup>+</sup>                                                                   |            |                      |      |                       |              |                              |
| Single Mass Analysis <sup>+</sup>                                                                           |            |                      |      |                       |              |                              |
| Tolerance = 5.0 PPM / DBE: min = -1.5, max = 50.0 <sup>+</sup>                                              |            |                      |      |                       |              |                              |
| Element prediction: Off <sup>+</sup>                                                                        |            |                      |      |                       |              |                              |
| Monoisotopic Mass, Odd and Even Electron Ions <sup>+</sup>                                                  |            |                      |      |                       |              |                              |
| 434 formula(e) evaluated with 4 results within limits (all results (up to 1000) for each mass) <sup>+</sup> |            |                      |      |                       |              |                              |
| Elements Used: C: 0-60 H: 0-80 N: 0-4 O: 0-6 S: 0-1 Cl: 0-1 <sup>+</sup>                                    |            |                      |      |                       |              |                              |
| Minimum: -1.5 <sup>+</sup>                                                                                  |            |                      |      |                       |              |                              |
| Maximum: 50.0 <sup>+</sup>                                                                                  |            |                      |      |                       |              |                              |
| Mass                                                                                                        | Calc. Mass | mDa                  | PPM  | DBE                   | i-FIT        | Formula <sup>+</sup>         |
| 277.1469                                                                                                    | 277.1467   | 0.2                  | 0.7  | 11.0                  | 2775578.3... | C19 H19 N O <sup>+</sup>     |
|                                                                                                             | 277.1472   | -0.3                 | -1.1 | 6.5                   | 2776511.5... | C16 H22 N2 Cl <sup>+</sup>   |
|                                                                                                             | 277.1474   | -0.5                 | -1.8 | 1.5                   | 2776347.5... | C13 H25 O4 S <sup>+</sup>    |
|                                                                                                             | 277.1460   | 0.9                  | 3.2  | 2.0                   | 2776332.3... | C11 H23 N3 O3 S <sup>+</sup> |

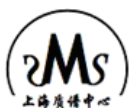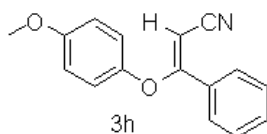

Shanghai Mass Spectrometry Center  
 Shanghai Institute of Organic Chemistry  
 Chinese Academic of Sciences  
 High Resolution MS Data Report

Instrument: Waters Micromass GCT Premier Ionisation Mode: EI+ Electron Energy: 70eV

Card Serial Number: GCT-P-T11-12-0S0970<sup>+</sup>  
 Sample Serial Number: HBSF-LiD21-S9<sup>+</sup>  
 Operator: Li<sup>+</sup>  
 Date: 2011/12/26<sup>+</sup>  
 Elemental Composition Report<sup>+</sup>  
 Single Mass Analysis<sup>+</sup>  
 Tolerance = 5.0 PPM / DBE: min = -1.5, max = 50.0<sup>+</sup>  
 Element prediction: Off<sup>+</sup>  
 Monoisotopic Mass, Odd and Even Electron Ions<sup>+</sup>  
 394 formula(e) evaluated with 4 results within limits (all results (up to 1000) for each mass)<sup>+</sup>  
 Elements Used: C: 0-60 H: 0-80 N: 0-4 O: 0-6 S: 0-1 Cl: 0-1<sup>+</sup>

| Minimum: |            |      |      |                   |           |                              |
|----------|------------|------|------|-------------------|-----------|------------------------------|
|          |            |      |      |                   |           |                              |
| Maximum: |            | 2.0  | 5.0  | 50.0 <sup>+</sup> |           |                              |
| Mass     | Calc. Mass | mDa  | PPM  | DBE               | i-FIT     | Formula <sup>+</sup>         |
| 251.0949 | 251.0951   | -0.2 | -0.8 | 6.5               | 3167.8... | C13 H16 N2 O C1 <sup>+</sup> |
|          | 251.0946   | 0.3  | 1.2  | 11.0              | 1.1...    | C16 H13 N O2 <sup>+</sup>    |
|          | 251.0953   | -0.4 | -1.6 | 1.5               | 313.7...  | C10 H19 O5 S <sup>+</sup>    |
|          | 251.0940   | 0.9  | 3.6  | 2.0               | 310.6...  | C8 H17 N3 O4 S <sup>+</sup>  |

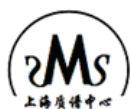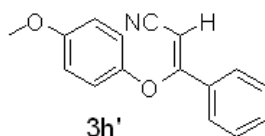

Shanghai Mass Spectrometry Center  
 Shanghai Institute of Organic Chemistry  
 Chinese Academic of Sciences  
 High Resolution MS Data Report

Instrument: Waters Micromass GCT Premier Ionisation Mode: EI+ Electron Energy: 70eV

Card Serial Number: GCT-P-T11-12-0S0971<sup>+</sup>  
 Sample Serial Number: HBSF-LiD21-S10<sup>+</sup>  
 Operator: Li<sup>+</sup>  
 Date: 2011/12/26<sup>+</sup>  
 Elemental Composition Report<sup>+</sup>  
 Single Mass Analysis<sup>+</sup>  
 Tolerance = 5.0 PPM / DBE: min = -1.5, max = 50.0<sup>+</sup>  
 Element prediction: Off<sup>+</sup>  
 Monoisotopic Mass, Odd and Even Electron Ions<sup>+</sup>  
 394 formula(e) evaluated with 4 results within limits (all results (up to 1000) for each mass)<sup>+</sup>  
 Elements Used: C: 0-60 H: 0-80 N: 0-4 O: 0-6 S: 0-1 Cl: 0-1<sup>+</sup>

| Minimum: |            |      |      |                   |              |                              |
|----------|------------|------|------|-------------------|--------------|------------------------------|
|          |            |      |      |                   |              |                              |
| Maximum: |            | 2.0  | 5.0  | 50.0 <sup>+</sup> |              |                              |
| Mass     | Calc. Mass | mDa  | PPM  | DBE               | i-FIT        | Formula <sup>+</sup>         |
| 251.0948 | 251.0946   | 0.2  | 0.8  | 11.0              | 2773024.5... | C16 H13 N O2 <sup>+</sup>    |
|          | 251.0951   | -0.3 | -1.2 | 6.5               | 2773065.3... | C13 H16 N2 O C1 <sup>+</sup> |
|          | 251.0953   | -0.5 | -2.0 | 1.5               | 2773027.0... | C10 H19 O5 S <sup>+</sup>    |
|          | 251.0940   | 0.8  | 3.2  | 2.0               | 2773025.5... | C8 H17 N3 O4 S <sup>+</sup>  |

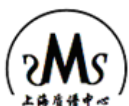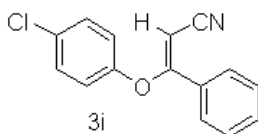

Shanghai Mass Spectrometry Center  
 Shanghai Institute of Organic Chemistry  
 Chinese Academic of Sciences  
 High Resolution MS Data Report

Instrument: Waters Micromass GCT Premier Ionisation Mode: EI+ Electron Energy: 70eV

Card Serial Number: GCT-P-T11-12-0S0974<sup>+</sup>

Sample Serial Number: HBSF-LiD21-S13<sup>+</sup>

Operator: Li<sup>+</sup>

Date: 2011/12/26<sup>+</sup>

Elemental Composition Report<sup>+</sup>

Single Mass Analysis <sup>+</sup>

Tolerance = 5.0 PPM / DBE: min = -1.5, max = 50.0<sup>+</sup>

Element prediction: Off <sup>+</sup>

Monoisotopic Mass, Odd and Even Electron Ions<sup>+</sup>

402 formula(e) evaluated with 5 results within limits (all results (up to 1000) for each mass)<sup>+</sup>

Elements Used: C: 0-60 H: 0-80 N: 0-4 O: 0-6 S: 0-1 Cl: 0-1 <sup>+</sup>

Minimum: -1.5<sup>+</sup>

Maximum: 2.0 5.0 50.0<sup>+</sup>

| Mass     | Calc. Mass | mDa  | PPM  | DBE  | i-FIT    | Formula <sup>+</sup>           |
|----------|------------|------|------|------|----------|--------------------------------|
| 255.0452 | 255.0451   | 0.1  | 0.4  | 11.0 | 0.5...   | C15 H10 N O Cl <sup>+</sup>    |
|          | 255.0446   | 0.6  | 2.4  | 15.5 | 387.5... | C18 H7 O2 <sup>+</sup>         |
|          | 255.0458   | -0.6 | -2.4 | 1.5  | 38.0...  | C9 H16 O4 S Cl <sup>+</sup>    |
|          | 255.0444   | 0.8  | 3.1  | 2.0  | 50.3...  | C7 H14 N3 O3 S Cl <sup>+</sup> |
|          | 255.0440   | 1.2  | 4.7  | 6.5  | 307.1... | C10 H11 N2 O4 S <sup>+</sup>   |

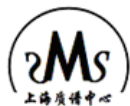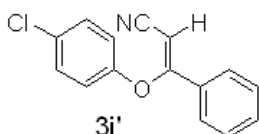

Shanghai Mass Spectrometry Center  
 Shanghai Institute of Organic Chemistry  
 Chinese Academic of Sciences  
 High Resolution MS Data Report

Instrument: Waters Micromass GCT Premier Ionisation Mode: EI+ Electron Energy: 70eV

Card Serial Number: GCT-P-T11-12-0S0975<sup>+</sup>

Sample Serial Number: HBSF-LiD21-S14<sup>+</sup>

Operator: Li<sup>+</sup>

Date: 2011/12/26<sup>+</sup>

Elemental Composition Report<sup>+</sup>

Single Mass Analysis <sup>+</sup>

Tolerance = 5.0 PPM / DBE: min = -1.5, max = 50.0<sup>+</sup>

Element prediction: Off <sup>+</sup>

Monoisotopic Mass, Odd and Even Electron Ions<sup>+</sup>

402 formula(e) evaluated with 6 results within limits (all results (up to 1000) for each mass)<sup>+</sup>

Elements Used: C: 0-60 H: 0-80 N: 0-4 O: 0-6 S: 0-1 Cl: 0-1 <sup>+</sup>

Minimum: -1.5<sup>+</sup>

Maximum: 2.0 5.0 50.0<sup>+</sup>

| Mass     | Calc. Mass | mDa  | PPM  | DBE  | i-FIT    | Formula <sup>+</sup>           |
|----------|------------|------|------|------|----------|--------------------------------|
| 255.0450 | 255.0451   | -0.1 | -0.4 | 11.0 | 0.3...   | C15 H10 N O Cl <sup>+</sup>    |
|          | 255.0446   | 0.4  | 1.6  | 15.5 | 227.5... | C18 H7 O2 <sup>+</sup>         |
|          | 255.0444   | 0.6  | 2.4  | 2.0  | 24.3...  | C7 H14 N3 O3 S Cl <sup>+</sup> |
|          | 255.0458   | -0.8 | -3.1 | 1.5  | 17.8...  | C9 H16 O4 S Cl <sup>+</sup>    |
|          | 255.0440   | 1.0  | 3.9  | 6.5  | 175.9... | C10 H11 N2 O4 S <sup>+</sup>   |
|          | 255.0437   | 1.3  | 5.1  | 11.5 | 1.1...   | C13 H8 N4 Cl <sup>+</sup>      |

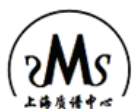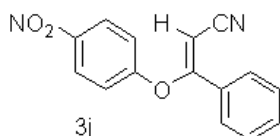

Shanghai Mass Spectrometry Center  
 Shanghai Institute of Organic Chemistry  
 Chinese Academic of Sciences  
 High Resolution MS Data Report

Instrument: Waters Micromass GCT Premier      Ionisation Mode: EI+      Electron Energy: 70eV

Card Serial Number: GCT-P-T11-12-0S0978<sup>+</sup>  
 Sample Serial Number: HBSF-LiD21-S17<sup>+</sup>  
 Operator: Li<sup>+</sup>  
 Date: 2011/12/26<sup>+</sup>  
 Elemental Composition Report<sup>+</sup>  
 Single Mass Analysis <sup>+</sup>  
 Tolerance = 5.0 PPM / DBE: min = -1.5, max = 50.0<sup>+</sup>  
 Element prediction: Off <sup>+</sup>  
 Monoisotopic Mass, Odd and Even Electron Ions<sup>+</sup>  
 420 formula(e) evaluated with 4 results within limits (all results (up to 1000) for each mass)<sup>+</sup>  
 Elements Used: C: 0-60    H: 0-80    N: 0-4    O: 0-6    S: 0-1    Cl: 0-1 <sup>+</sup>

| Mass     | Calc. Mass | mDa  | PPM  | DBE  | 1-FIT        | Formula <sup>+</sup>          |
|----------|------------|------|------|------|--------------|-------------------------------|
| 266.0692 | 266.0691   | 0.1  | 0.4  | 12.0 | 2773019.5... | C15 H10 N2 O3 <sup>+</sup>    |
|          | 266.0696   | -0.4 | -1.5 | 7.5  | 2773077.0... | C12 H13 N3 O2 Cl <sup>+</sup> |
|          | 266.0698   | -0.6 | -2.3 | 2.5  | 2773030.8... | C9 H16 N O6 S <sup>+</sup>    |
|          | 266.0685   | 0.7  | 2.6  | 3.0  | 2773029.3... | C7 H14 N4 O5 S <sup>+</sup>   |

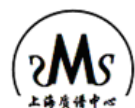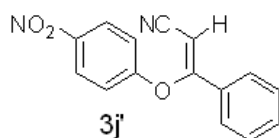

Shanghai Mass Spectrometry Center  
 Shanghai Institute of Organic Chemistry  
 Chinese Academic of Sciences  
 High Resolution MS Data Report

Instrument: Waters Micromass GCT Premier      Ionisation Mode: EI+      Electron Energy: 70eV

Card Serial Number: GCT-P-T11-12-0S0979<sup>+</sup>  
 Sample Serial Number: HBSF-LiD21-S18<sup>+</sup>  
 Operator: Li<sup>+</sup>  
 Date: 2011/12/26<sup>+</sup>  
 Elemental Composition Report<sup>+</sup>  
 Single Mass Analysis <sup>+</sup>  
 Tolerance = 5.0 PPM / DBE: min = -1.5, max = 50.0<sup>+</sup>  
 Element prediction: Off <sup>+</sup>  
 Monoisotopic Mass, Odd and Even Electron Ions<sup>+</sup>  
 420 formula(e) evaluated with 4 results within limits (all results (up to 1000) for each mass)<sup>+</sup>  
 Elements Used: C: 0-60    H: 0-80    N: 0-4    O: 0-6    S: 0-1    Cl: 0-1 <sup>+</sup>

| Mass     | Calc. Mass | mDa  | PPM  | DBE  | 1-FIT        | Formula <sup>+</sup>          |
|----------|------------|------|------|------|--------------|-------------------------------|
| 266.0689 | 266.0691   | -0.2 | -0.8 | 12.0 | 2773092.5... | C15 H10 N2 O3 <sup>+</sup>    |
|          | 266.0685   | 0.4  | 1.5  | 3.0  | 2773309.5... | C7 H14 N4 O5 S <sup>+</sup>   |
|          | 266.0696   | -0.7 | -2.6 | 7.5  | 2773436.5... | C12 H13 N3 O2 Cl <sup>+</sup> |
|          | 266.0698   | -0.9 | -3.4 | 2.5  | 2773316.8... | C9 H16 N O6 S <sup>+</sup>    |

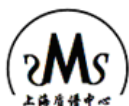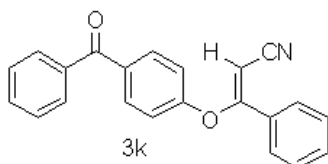

Shanghai Mass Spectrometry Center  
 Shanghai Institute of Organic Chemistry  
 Chinese Academic of Sciences  
 High Resolution MS Data Report

Instrument: Waters Micromass GCT Premier      Ionisation Mode: EI+      Electron Energy: 70eV

Card Serial Number: GCT-P-T11-12-OS0980<sup>+</sup>

Sample Serial Number: HBSF-LiD21-S19<sup>+</sup>

Operator: Li<sup>+</sup>

Date: 2011/12/26<sup>+</sup>

Elemental Composition Report<sup>+</sup>

Single Mass Analysis <sup>+</sup>

Tolerance = 5.0 PPM / DBE: min = -1.5, max = 50.0<sup>+</sup>

Element prediction: Off <sup>+</sup>

Monoisotopic Mass, Odd and Even Electron Ions<sup>+</sup>

514 formula(e) evaluated with 7 results within limits (all results (up to 1000) for each mass)<sup>+</sup>

Elements Used: C: 0-60    H: 0-80    N: 0-4    O: 0-6    S: 0-1    Cl: 0-1    <sup>+</sup>

Minimum: -1.5<sup>+</sup>

Maximum: 2.0      5.0      50.0<sup>+</sup>

| Mass     | Calc. Mass | mDa  | PPM  | DBE  | i-FIT | Formula <sup>+</sup>            |
|----------|------------|------|------|------|-------|---------------------------------|
| 325.1104 | 325.1103   | 0.1  | 0.3  | 16.0 | 6.1   | C22 H15 N O2 <sup>+</sup>       |
|          | 325.1101   | 0.3  | 0.9  | 2.5  | 791.0 | C11 H22 N4 O3 S Cl <sup>+</sup> |
|          | 325.1108   | -0.4 | -1.2 | 11.5 | 735.2 | C19 H18 N2 O Cl <sup>+</sup>    |
|          | 325.1110   | -0.6 | -1.8 | 6.5  | 86.0  | C16 H21 O5 S <sup>+</sup>       |
|          | 325.1096   | 0.8  | 2.5  | 7.0  | 79.2  | C14 H19 N3 O4 S <sup>+</sup>    |
|          | 325.1115   | -1.1 | -3.4 | 2.0  | 790.3 | C13 H24 N O4 S Cl <sup>+</sup>  |
|          | 325.1089   | 1.5  | 4.6  | 16.5 | 2.4   | C20 H13 N4 O <sup>+</sup>       |

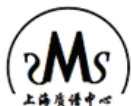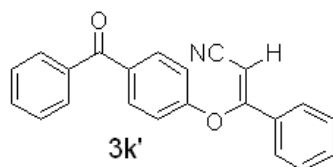

Shanghai Mass Spectrometry Center  
 Shanghai Institute of Organic Chemistry  
 Chinese Academic of Sciences  
 High Resolution MS Data Report

Instrument: Waters Micromass GCT Premier      Ionisation Mode: EI+      Electron Energy: 70eV

Card Serial Number: GCT-P-T11-12-OS0981<sup>+</sup>

Sample Serial Number: HBSF-LiD21-S20<sup>+</sup>

Operator: Li<sup>+</sup>

Date: 2011/12/26<sup>+</sup>

Elemental Composition Report<sup>+</sup>

Single Mass Analysis <sup>+</sup>

Tolerance = 5.0 PPM / DBE: min = -1.5, max = 50.0<sup>+</sup>

Element prediction: Off <sup>+</sup>

Monoisotopic Mass, Odd and Even Electron Ions<sup>+</sup>

514 formula(e) evaluated with 6 results within limits (all results (up to 1000) for each mass)<sup>+</sup>

Elements Used: C: 0-60    H: 0-80    N: 0-4    O: 0-6    S: 0-1    Cl: 0-1    <sup>+</sup>

Minimum: -1.5<sup>+</sup>

Maximum: 2.0      5.0      50.0<sup>+</sup>

| Mass     | Calc. Mass | mDa  | PPM  | DBE  | i-FIT     | Formula <sup>+</sup>            |
|----------|------------|------|------|------|-----------|---------------------------------|
| 325.1106 | 325.1108   | -0.2 | -0.6 | 11.5 | 2773154.0 | C19 H18 N2 O Cl <sup>+</sup>    |
|          | 325.1103   | 0.3  | 0.9  | 16.0 | 2773040.0 | C22 H15 N O2 <sup>+</sup>       |
|          | 325.1110   | -0.4 | -1.2 | 6.5  | 2773083.3 | C16 H21 O5 S <sup>+</sup>       |
|          | 325.1101   | 0.5  | 1.5  | 2.5  | 2773156.3 | C11 H22 N4 O3 S Cl <sup>+</sup> |
|          | 325.1115   | -0.9 | -2.8 | 2.0  | 2773156.3 | C13 H24 N O4 S Cl <sup>+</sup>  |
|          | 325.1096   | 1.0  | 3.1  | 7.0  | 2773079.5 | C14 H19 N3 O4 S <sup>+</sup>    |

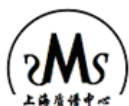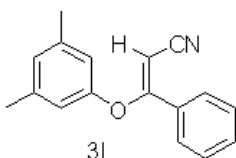

Shanghai Mass Spectrometry Center  
 Shanghai Institute of Organic Chemistry  
 Chinese Academic of Sciences  
 High Resolution MS Data Report

Instrument: Waters Micromass GCT Premier      Ionisation Mode: EI+      Electron Energy: 70eV

---

Card Serial Number: GCT-P-T11-12-OS0966<sup>+</sup>  
 Sample Serial Number: HBSF-LiD21-S5<sup>+</sup>  
 Operator: Li<sup>+</sup>  
 Date: 2011/12/26<sup>+</sup>  
 Elemental Composition Report<sup>+</sup>  
 Single Mass Analysis<sup>+</sup>  
 Tolerance = 5.0 PPM / DBE: min = -1.5, max = 50.0<sup>+</sup>  
 Element prediction: Off<sup>+</sup>  
 Monoisotopic Mass, Odd and Even Electron Ions<sup>+</sup>  
 386 formula(e) evaluated with 4 results within limits (all results (up to 1000) for each mass)<sup>+</sup>  
 Elements Used:<sup>+</sup>  
 C: 0-60    H: 0-80    N: 0-4    O: 0-6    S: 0-1    Cl: 0-1    <sup>+</sup>

| Minimum: |            |      | 2.0  | 5.0  | 50.0 <sup>+</sup> |                             |  |
|----------|------------|------|------|------|-------------------|-----------------------------|--|
| Maximum: |            |      | 2.0  | 5.0  | 50.0 <sup>+</sup> |                             |  |
| Mass     | Calc. Mass | mDa  | PPM  | DBE  | i-FIT             | Formula <sup>+</sup>        |  |
| 249.1158 | 249.1159   | -0.1 | -0.4 | 6.5  | 2107.6...         | C14 H18 N2 C1 <sup>+</sup>  |  |
|          | 249.1161   | -0.3 | -1.2 | 1.5  | 243.5...          | C11 H21 O4 S <sup>+</sup>   |  |
|          | 249.1154   | 0.4  | 1.6  | 11.0 | 6.1...            | C17 H15 N O <sup>+</sup>    |  |
|          | 249.1147   | 1.1  | 4.4  | 2.0  | 230.0...          | C9 H19 N3 O3 S <sup>+</sup> |  |

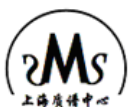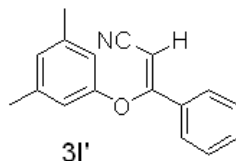

Shanghai Mass Spectrometry Center  
 Shanghai Institute of Organic Chemistry  
 Chinese Academic of Sciences  
 High Resolution MS Data Report

Instrument: Waters Micromass GCT Premier      Ionisation Mode: EI+      Electron Energy: 70eV

---

Card Serial Number: GCT-P-T11-12-OS0967<sup>+</sup>  
 Sample Serial Number: HBSF-LiD21-S6<sup>+</sup>  
 Operator: Li<sup>+</sup>  
 Date: 2011/12/26<sup>+</sup>  
 Elemental Composition Report<sup>+</sup>  
 Single Mass Analysis<sup>+</sup>  
 Tolerance = 5.0 PPM / DBE: min = -1.5, max = 50.0<sup>+</sup>  
 Element prediction: Off<sup>+</sup>  
 Monoisotopic Mass, Odd and Even Electron Ions<sup>+</sup>  
 386 formula(e) evaluated with 4 results within limits (all results (up to 1000) for each mass)<sup>+</sup>  
 Elements Used: C: 0-60    H: 0-80    N: 0-4    O: 0-6    S: 0-1    Cl: 0-1    <sup>+</sup>

| Minimum: |            |      | 2.0  | 5.0  | 50.0 <sup>+</sup> |                             |  |
|----------|------------|------|------|------|-------------------|-----------------------------|--|
| Maximum: |            |      | 2.0  | 5.0  | 50.0 <sup>+</sup> |                             |  |
| Mass     | Calc. Mass | mDa  | PPM  | DBE  | i-FIT             | Formula <sup>+</sup>        |  |
| 249.1155 | 249.1154   | 0.1  | 0.4  | 11.0 | 7.0...            | C17 H15 N O <sup>+</sup>    |  |
|          | 249.1159   | -0.4 | -1.6 | 6.5  | 1080.6...         | C14 H18 N2 C1 <sup>+</sup>  |  |
|          | 249.1161   | -0.6 | -2.4 | 1.5  | 197.4...          | C11 H21 O4 S <sup>+</sup>   |  |
|          | 249.1147   | 0.8  | 3.2  | 2.0  | 185.2...          | C9 H19 N3 O3 S <sup>+</sup> |  |

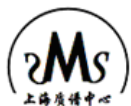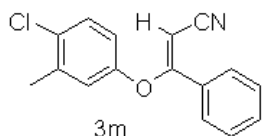

Shanghai Mass Spectrometry Center  
 Shanghai Institute of Organic Chemistry  
 Chinese Academic of Sciences  
 High Resolution MS Data Report

Instrument: Waters Micromass GCT Premier      Ionisation Mode: EI+      Electron Energy: 70eV

Card Serial Number: GCT-P-T11-12-0S0976<sup>+</sup>  
 Sample Serial Number: HBSF-LiD21-S15<sup>+</sup>  
 Operator: Li<sup>+</sup>  
 Date: 2011/12/26<sup>+</sup>  
 Elemental Composition Report<sup>+</sup>  
 Single Mass Analysis <sup>+</sup>  
 Tolerance = 5.0 PPM / DBE: min = -1.5, max = 50.0<sup>+</sup>  
 Element prediction: Off <sup>+</sup>  
 Monoisotopic Mass, Odd and Even Electron Ions<sup>+</sup>  
 420 formula(e) evaluated with 5 results within limits (all results (up to 1000) for each mass)<sup>+</sup>  
 Elements Used: C: 0-60    H: 0-80    N: 0-4    O: 0-6    S: 0-1    Cl: 0-1    <sup>+</sup>

| Mass     | Calc. Mass | mDa  | PPM  | DBE  | i-FIT     | Formula <sup>+</sup>           |
|----------|------------|------|------|------|-----------|--------------------------------|
| 269.0612 | 269.0614   | -0.2 | -0.7 | 1.5  | 209.3...  | C10 H18 O4 S Cl <sup>+</sup>   |
|          | 269.0607   | 0.5  | 1.9  | 11.0 | 32.4...   | C16 H12 N O Cl <sup>+</sup>    |
|          | 269.0603   | 0.9  | 3.3  | 15.5 | 1092.3... | C19 H9 O2 <sup>+</sup>         |
|          | 269.0623   | -1.1 | -4.1 | 11.0 | 873.6...  | C14 H11 N3 O S <sup>+</sup>    |
|          | 269.0601   | 1.1  | 4.1  | 2.0  | 250.7...  | C8 H16 N3 O3 S Cl <sup>+</sup> |

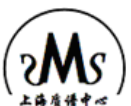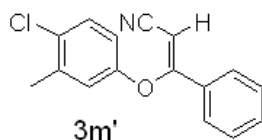

Shanghai Mass Spectrometry Center  
 Shanghai Institute of Organic Chemistry  
 Chinese Academic of Sciences  
 High Resolution MS Data Report

Instrument: Waters Micromass GCT Premier      Ionisation Mode: EI+      Electron Energy: 70eV

Card Serial Number: GCT-P-T11-12-0S0977<sup>+</sup>  
 Sample Serial Number: HBSF-LiD21-S16<sup>+</sup>  
 Operator: Li<sup>+</sup>  
 Date: 2011/12/26<sup>+</sup>  
 Elemental Composition Report<sup>+</sup>  
 Single Mass Analysis <sup>+</sup>  
 Tolerance = 5.0 PPM / DBE: min = -1.5, max = 50.0<sup>+</sup>  
 Element prediction: Off <sup>+</sup>  
 Monoisotopic Mass, Odd and Even Electron Ions<sup>+</sup>  
 420 formula(e) evaluated with 6 results within limits (all results (up to 1000) for each mass)<sup>+</sup>  
 Elements Used: C: 0-60    H: 0-80    N: 0-4    O: 0-6    S: 0-1    Cl: 0-1    <sup>+</sup>

| Mass     | Calc. Mass | mDa  | PPM  | DBE  | i-FIT    | Formula <sup>+</sup>           |
|----------|------------|------|------|------|----------|--------------------------------|
| 269.0605 | 269.0603   | 0.2  | 0.7  | 15.5 | 169.8... | C19 H9 O2 <sup>+</sup>         |
|          | 269.0607   | -0.2 | -0.7 | 11.0 | 4.5...   | C16 H12 N O Cl <sup>+</sup>    |
|          | 269.0601   | 0.4  | 1.5  | 2.0  | 35.4...  | C8 H16 N3 O3 S Cl <sup>+</sup> |
|          | 269.0614   | -0.9 | -3.3 | 1.5  | 29.4...  | C10 H18 O4 S Cl <sup>+</sup>   |
|          | 269.0596   | 0.9  | 3.3  | 6.5  | 146.7... | C11 H13 N2 O4 S <sup>+</sup>   |
|          | 269.0594   | 1.1  | 4.1  | 11.5 | 7.2...   | C14 H10 N4 Cl <sup>+</sup>     |

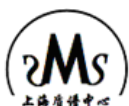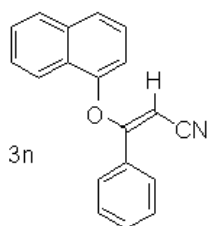

Shanghai Mass Spectrometry Center  
 Shanghai Institute of Organic Chemistry  
 Chinese Academic of Sciences  
 High Resolution MS Data Report

Instrument: Waters Micromass GCT Premier Ionisation Mode: EI+ Electron Energy: 70eV

Card Serial Number: GCT-P-T11-12-0S0972<sup>+</sup>

Sample Serial Number: HBSF-LiD21-S11<sup>+</sup>

Operator: Li<sup>+</sup>

Date: 2011/12/26<sup>+</sup>

Elemental Composition Report<sup>+</sup>

Single Mass Analysis<sup>+</sup>

Tolerance = 5.0 PPM / DBE: min = -1.5, max = 50.0<sup>+</sup>

Element prediction: Off<sup>+</sup>

Monoisotopic Mass, Odd and Even Electron Ions<sup>+</sup>

426 formula(e) evaluated with 6 results within limits (all results (up to 1000) for each mass)<sup>+</sup>

Elements Used: C: 0-60 H: 0-80 N: 0-4 O: 0-6 S: 0-1 Cl: 0-1<sup>+</sup>

Minimum:

Maximum: 2.0 5.0 50.0<sup>+</sup>

| Mass     | Calc. Mass | mDa  | PPM  | DBE  | i-FIT     | Formula <sup>+</sup>           |
|----------|------------|------|------|------|-----------|--------------------------------|
| 271.1001 | 271.1002   | -0.1 | -0.4 | 9.5  | 3893.2... | C16 H16 N2 C1 <sup>+</sup>     |
|          | 271.1004   | -0.3 | -1.1 | 4.5  | 411.3...  | C13 H19 O4 S <sup>+</sup>      |
|          | 271.0997   | 0.4  | 1.5  | 14.0 | 1.8...    | C19 H13 N O <sup>+</sup>       |
|          | 271.0996   | 0.5  | 1.8  | 0.5  | 4200.6... | C8 H20 N4 O2 S C1 <sup>+</sup> |
|          | 271.1009   | -0.8 | -3.0 | 0.0  | 4195.8... | C10 H22 N O3 S C1 <sup>+</sup> |
|          | 271.0991   | 1.0  | 3.7  | 5.0  | 392.5...  | C11 H17 N3 O3 S <sup>+</sup>   |

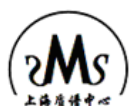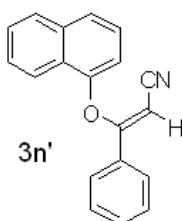

Shanghai Mass Spectrometry Center  
 Shanghai Institute of Organic Chemistry  
 Chinese Academic of Sciences  
 High Resolution MS Data Report

Instrument: Waters Micromass GCT Premier Ionisation Mode: EI+ Electron Energy: 70eV

Card Serial Number: GCT-P-T11-12-0S0973<sup>+</sup>

Sample Serial Number: HBSF-LiD21-S12<sup>+</sup>

Operator: Li<sup>+</sup>

Date: 2011/12/26<sup>+</sup>

Elemental Composition Report<sup>+</sup>

Single Mass Analysis<sup>+</sup>

Tolerance = 5.0 PPM / DBE: min = -1.5, max = 50.0<sup>+</sup>

Element prediction: Off<sup>+</sup>

Monoisotopic Mass, Odd and Even Electron Ions<sup>+</sup>

426 formula(e) evaluated with 6 results within limits (all results (up to 1000) for each mass)<sup>+</sup>

Elements Used: C: 0-60 H: 0-80 N: 0-4 O: 0-6 S: 0-1 Cl: 0-1<sup>+</sup>

Minimum:

Maximum: 2.0 5.0 50.0<sup>+</sup>

| Mass     | Calc. Mass | mDa  | PPM  | DBE  | i-FIT     | Formula <sup>+</sup>           |
|----------|------------|------|------|------|-----------|--------------------------------|
| 271.0995 | 271.0996   | -0.1 | -0.4 | 0.5  | 1643.8... | C8 H20 N4 O2 S C1 <sup>+</sup> |
|          | 271.0997   | -0.2 | -0.7 | 14.0 | 1.2...    | C19 H13 N O <sup>+</sup>       |
|          | 271.0991   | 0.4  | 1.5  | 5.0  | 141.4...  | C11 H17 N3 O3 S <sup>+</sup>   |
|          | 271.1002   | -0.7 | -2.6 | 9.5  | 1508.4... | C16 H16 N2 C1 <sup>+</sup>     |
|          | 271.1004   | -0.9 | -3.3 | 4.5  | 143.7...  | C13 H19 O4 S <sup>+</sup>      |
|          | 271.0984   | 1.1  | 4.1  | 14.5 | 6.3...    | C17 H11 N4 <sup>+</sup>        |



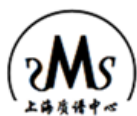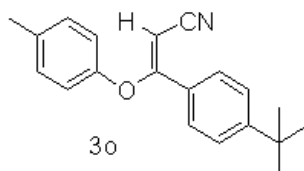

Shanghai Mass Spectrometry Center  
 Shanghai Institute of Organic Chemistry  
 Chinese Academic of Sciences  
 High Resolution MS Data Report

Instrument: Waters Micromass GCT Premier Ionisation Mode: EI+ Electron Energy: 70eV

Card Serial Number: GCT-P-T12-03-0S0203<sup>+</sup>

Sample Serial Number: HBSF-LM15-S5<sup>+</sup>

Operator: Li<sup>+</sup>

Date: 2012/03/23<sup>+</sup>

Elemental Composition Report<sup>+</sup>

Single Mass Analysis <sup>+</sup>

Tolerance = 5.0 PPM / DBE: min = -1.5, max = 50.0<sup>+</sup>

Element prediction: Off <sup>+</sup>

Monoisotopic Mass, Odd and Even Electron Ions<sup>+</sup>

232 formula(e) evaluated with 2 results within limits (all results (up to 1000) for each mass)<sup>+</sup>

Elements Used: C: 0-60 H: 0-80 N: 0-2 O: 0-6 Cl: 0-1 I: 0-1 <sup>+</sup>

Minimum:

Maximum:

| Mass     | Calc. Mass | mDa  | PPM  | DBE  | i-FIT     | Formula <sup>+</sup>       |
|----------|------------|------|------|------|-----------|----------------------------|
| 291.1626 | 291.1628   | -0.2 | -0.7 | 6.5  | 3437.0... | C17 H24 N2 Cl <sup>+</sup> |
|          | 291.1623   | 0.3  | 1.0  | 11.0 | 6.7...    | C20 H21 N O <sup>+</sup>   |

<sup>+</sup>

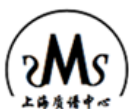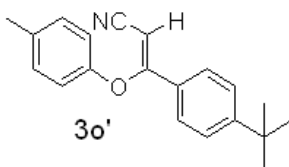

Shanghai Mass Spectrometry Center  
 Shanghai Institute of Organic Chemistry  
 Chinese Academic of Sciences  
 High Resolution MS Data Report

Instrument: Waters Micromass GCT Premier Ionisation Mode: EI+ Electron Energy: 70eV

Card Serial Number: GCT-P-T12-03-0S0204<sup>+</sup>

Sample Serial Number: HBSF-LM15-S6<sup>+</sup>

Operator: Li<sup>+</sup>

Date: 2012/03/23<sup>+</sup>

Elemental Composition Report<sup>+</sup>

Single Mass Analysis <sup>+</sup>

Tolerance = 5.0 PPM / DBE: min = -1.5, max = 50.0<sup>+</sup>

Element prediction: Off <sup>+</sup>

Monoisotopic Mass, Odd and Even Electron Ions<sup>+</sup>

232 formula(e) evaluated with 2 results within limits (all results (up to 1000) for each mass)<sup>+</sup>

Elements Used: C: 0-60 H: 0-80 N: 0-2 O: 0-6 Cl: 0-1 I: 0-1 <sup>+</sup>

Minimum:

Maximum:

| Mass     | Calc. Mass | mDa  | PPM  | DBE  | i-FIT    | Formula <sup>+</sup>       |
|----------|------------|------|------|------|----------|----------------------------|
| 291.1622 | 291.1623   | -0.1 | -0.3 | 11.0 | 12.5...  | C20 H21 N O <sup>+</sup>   |
|          | 291.1628   | -0.6 | -2.1 | 6.5  | 958.2... | C17 H24 N2 Cl <sup>+</sup> |

<sup>+</sup>

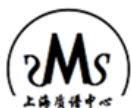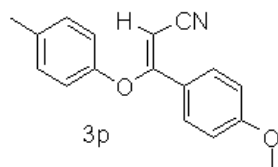

Shanghai Mass Spectrometry Center  
 Shanghai Institute of Organic Chemistry  
 Chinese Academic of Sciences  
 High Resolution MS Data Report

Instrument: Waters Micromass GCT Premier Ionisation Mode: EI+ Electron Energy: 70eV  
 Card Serial Number: GCT-P-T12-03-OS0211  
 Sample Serial Number: HBSF-LM15-S13  
 Operator: Li  
 Date: 2012/03/23  
 Elemental Composition Report  
 Single Mass Analysis  
 Tolerance = 5.0 PPM / DBE: min = -1.5, max = 50.0  
 Element prediction: Off  
 Monoisotopic Mass, Odd and Even Electron Ions  
 201 formula(e) evaluated with 2 results within limits (all results (up to 1000) for each mass)  
 Elements Used: C: 0-60 H: 0-80 N: 0-2 O: 0-6 Cl: 0-1 I: 0-1  
 Minimum: -1.5  
 Maximum: 2.0 5.0 50.0  

| Mass     | Calc. Mass | mDa  | PPM  | DBE  | i-FIT  | Formula         |
|----------|------------|------|------|------|--------|-----------------|
| 265.1105 | 265.1103   | 0.2  | 0.8  | 11.0 | 1.7    | C17 H15 N O2    |
|          | 265.1108   | -0.3 | -1.1 | 6.5  | 4528.0 | C14 H18 N2 O C1 |

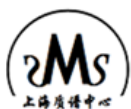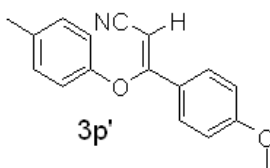

Shanghai Mass Spectrometry Center  
 Shanghai Institute of Organic Chemistry  
 Chinese Academic of Sciences  
 High Resolution MS Data Report

Instrument: Waters Micromass GCT Premier Ionisation Mode: EI+ Electron Energy: 70eV  
 Card Serial Number: GCT-P-T12-03-OS0212  
 Sample Serial Number: HBSF-LM15-S14  
 Operator: Li  
 Date: 2012/03/23  
 Elemental Composition Report  
 Single Mass Analysis  
 Tolerance = 5.0 PPM / DBE: min = -1.5, max = 50.0  
 Element prediction: Off  
 Monoisotopic Mass, Odd and Even Electron Ions  
 201 formula(e) evaluated with 2 results within limits (all results (up to 1000) for each mass)  
 Elements Used: C: 0-60 H: 0-80 N: 0-2 O: 0-6 Cl: 0-1 I: 0-1  
 Minimum: -1.5  
 Maximum: 2.0 5.0 50.0  

| Mass     | Calc. Mass | mDa  | PPM  | DBE  | i-FIT | Formula         |
|----------|------------|------|------|------|-------|-----------------|
| 265.1102 | 265.1103   | -0.1 | -0.4 | 11.0 | 8.5   | C17 H15 N O2    |
|          | 265.1108   | -0.6 | -2.3 | 6.5  | 286.0 | C14 H18 N2 O C1 |

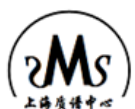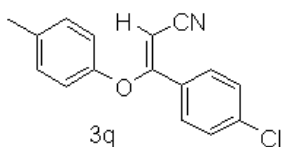

Shanghai Mass Spectrometry Center  
 Shanghai Institute of Organic Chemistry  
 Chinese Academic of Sciences  
 High Resolution MS Data Report

|                                                                                                             |            |                      |     |                       |           |                             |
|-------------------------------------------------------------------------------------------------------------|------------|----------------------|-----|-----------------------|-----------|-----------------------------|
| Instrument: Waters Micromass GCT Premier                                                                    |            | Ionisation Mode: EI+ |     | Electron Energy: 70eV |           |                             |
| Card Serial Number: GCT-P-T12-03-OS0199 <sup>+</sup>                                                        |            |                      |     |                       |           |                             |
| Sample Serial Number: HBSF-LM15-S1 <sup>+</sup>                                                             |            |                      |     |                       |           |                             |
| Operator: Li <sup>+</sup>                                                                                   |            |                      |     |                       |           |                             |
| Date: 2012/03/23 <sup>+</sup>                                                                               |            |                      |     |                       |           |                             |
| Elemental Composition Report <sup>+</sup>                                                                   |            |                      |     |                       |           |                             |
| Single Mass Analysis <sup>+</sup>                                                                           |            |                      |     |                       |           |                             |
| Tolerance = 5.0 PPM / DBE: min = -1.5, max = 50.0 <sup>+</sup>                                              |            |                      |     |                       |           |                             |
| Element prediction: Off <sup>+</sup>                                                                        |            |                      |     |                       |           |                             |
| Monoisotopic Mass, Odd and Even Electron Ions <sup>+</sup>                                                  |            |                      |     |                       |           |                             |
| 205 formula(e) evaluated with 2 results within limits (all results (up to 1000) for each mass) <sup>+</sup> |            |                      |     |                       |           |                             |
| Elements Used: C: 0-60 H: 0-80 N: 0-2 O: 0-6 Cl: 0-1 I: 0-1 <sup>+</sup>                                    |            |                      |     |                       |           |                             |
| Minimum: -1.5 <sup>+</sup>                                                                                  |            |                      |     |                       |           |                             |
| Maximum: 50.0 <sup>+</sup>                                                                                  |            |                      |     |                       |           |                             |
| Mass                                                                                                        | Calc. Mass | mDa                  | PPM | DBE                   | i-FIT     | Formula <sup>+</sup>        |
| 269.0610                                                                                                    | 269.0607   | 0.3                  | 1.1 | 11.0                  | 1.5...    | C16 H12 N O Cl <sup>+</sup> |
|                                                                                                             | 269.0603   | 0.7                  | 2.6 | 15.5                  | 1916.3... | C19 H9 O2 <sup>+</sup>      |

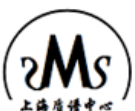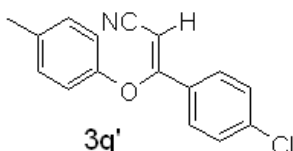

Shanghai Mass Spectrometry Center  
 Shanghai Institute of Organic Chemistry  
 Chinese Academic of Sciences  
 High Resolution MS Data Report

|                                                                                                             |            |                      |      |                       |          |                             |
|-------------------------------------------------------------------------------------------------------------|------------|----------------------|------|-----------------------|----------|-----------------------------|
| Instrument: Waters Micromass GCT Premier                                                                    |            | Ionisation Mode: EI+ |      | Electron Energy: 70eV |          |                             |
| Card Serial Number: GCT-P-T12-03-OS0200 <sup>+</sup>                                                        |            |                      |      |                       |          |                             |
| Sample Serial Number: HBSF-LM15-S2 <sup>+</sup>                                                             |            |                      |      |                       |          |                             |
| Operator: Li <sup>+</sup>                                                                                   |            |                      |      |                       |          |                             |
| Date: 2012/03/23 <sup>+</sup>                                                                               |            |                      |      |                       |          |                             |
| Elemental Composition Report <sup>+</sup>                                                                   |            |                      |      |                       |          |                             |
| Single Mass Analysis <sup>+</sup>                                                                           |            |                      |      |                       |          |                             |
| Tolerance = 5.0 PPM / DBE: min = -1.5, max = 50.0 <sup>+</sup>                                              |            |                      |      |                       |          |                             |
| Element prediction: Off <sup>+</sup>                                                                        |            |                      |      |                       |          |                             |
| Monoisotopic Mass, Odd and Even Electron Ions <sup>+</sup>                                                  |            |                      |      |                       |          |                             |
| 205 formula(e) evaluated with 2 results within limits (all results (up to 1000) for each mass) <sup>+</sup> |            |                      |      |                       |          |                             |
| Elements Used: C: 0-60 H: 0-80 N: 0-2 O: 0-6 Cl: 0-1 I: 0-1 <sup>+</sup>                                    |            |                      |      |                       |          |                             |
| Minimum: -1.5 <sup>+</sup>                                                                                  |            |                      |      |                       |          |                             |
| Maximum: 50.0 <sup>+</sup>                                                                                  |            |                      |      |                       |          |                             |
| Mass                                                                                                        | Calc. Mass | mDa                  | PPM  | DBE                   | i-FIT    | Formula <sup>+</sup>        |
| 269.0606                                                                                                    | 269.0607   | -0.1                 | -0.4 | 11.0                  | 0.6...   | C16 H12 N O Cl <sup>+</sup> |
|                                                                                                             | 269.0603   | 0.3                  | 1.1  | 15.5                  | 172.6... | C19 H9 O2 <sup>+</sup>      |

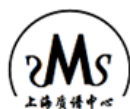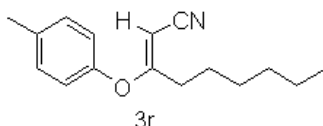

Shanghai Mass Spectrometry Center  
 Shanghai Institute of Organic Chemistry  
 Chinese Academic of Sciences  
 High Resolution MS Data Report

|                                                                                                             |            |                      |      |                       |           |                             |
|-------------------------------------------------------------------------------------------------------------|------------|----------------------|------|-----------------------|-----------|-----------------------------|
| Instrument: Waters Micromass GCT Premier                                                                    |            | Ionisation Mode: EI+ |      | Electron Energy: 70eV |           |                             |
| Card Serial Number: GCT-P-T12-03-OS0208 <sup>+</sup>                                                        |            |                      |      |                       |           |                             |
| Sample Serial Number: HBSF-LM15-S10 <sup>+</sup>                                                            |            |                      |      |                       |           |                             |
| Operator: Li <sup>+</sup>                                                                                   |            |                      |      |                       |           |                             |
| Date: 2012/03/28 <sup>+</sup>                                                                               |            |                      |      |                       |           |                             |
| Elemental Composition Report <sup>+</sup>                                                                   |            |                      |      |                       |           |                             |
| Single Mass Analysis <sup>+</sup>                                                                           |            |                      |      |                       |           |                             |
| Tolerance = 5.0 PPM / DBE: min = -1.5, max = 50.0 <sup>+</sup>                                              |            |                      |      |                       |           |                             |
| Element prediction: Off <sup>+</sup>                                                                        |            |                      |      |                       |           |                             |
| Monoisotopic Mass, Odd and Even Electron Ions <sup>+</sup>                                                  |            |                      |      |                       |           |                             |
| 275 formula(e) evaluated with 2 results within limits (all results (up to 1000) for each mass) <sup>+</sup> |            |                      |      |                       |           |                             |
| Elements Used: C: 0-60 H: 0-80 N: 0-2 O: 0-2 F: 0-6 Br: 0-1 <sup>+</sup>                                    |            |                      |      |                       |           |                             |
| Minimum: -1.5 <sup>+</sup>                                                                                  |            |                      |      |                       |           |                             |
| Maximum: 50.0 <sup>+</sup>                                                                                  |            |                      |      |                       |           |                             |
| Mass                                                                                                        | Calc. Mass | mDa                  | PPM  | DBE                   | i-FIT     | Formula <sup>+</sup>        |
| 243.1626                                                                                                    | 243.1623   | 0.3                  | 1.2  | 7.0                   | 2773761.0 | C16 H21 N O <sup>+</sup>    |
|                                                                                                             | 243.1635   | -0.9                 | -3.7 | 3.0                   | 2773615.3 | C13 H22 N O2 F <sup>+</sup> |

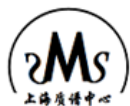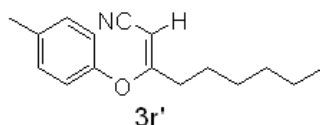

Shanghai Mass Spectrometry Center  
 Shanghai Institute of Organic Chemistry  
 Chinese Academic of Sciences  
 High Resolution MS Data Report

|                                                                                                             |            |                      |      |                       |       |                             |
|-------------------------------------------------------------------------------------------------------------|------------|----------------------|------|-----------------------|-------|-----------------------------|
| Instrument: Waters Micromass GCT Premier                                                                    |            | Ionisation Mode: EI+ |      | Electron Energy: 70eV |       |                             |
| Card Serial Number: GCT-P-T12-03-OS0209 <sup>+</sup>                                                        |            |                      |      |                       |       |                             |
| Sample Serial Number: HBSF-LM15-S11 <sup>+</sup>                                                            |            |                      |      |                       |       |                             |
| Operator: Li <sup>+</sup>                                                                                   |            |                      |      |                       |       |                             |
| Date: 2012/03/28 <sup>+</sup>                                                                               |            |                      |      |                       |       |                             |
| Elemental Composition Report <sup>+</sup>                                                                   |            |                      |      |                       |       |                             |
| Single Mass Analysis <sup>+</sup>                                                                           |            |                      |      |                       |       |                             |
| Tolerance = 5.0 PPM / DBE: min = -1.5, max = 50.0 <sup>+</sup>                                              |            |                      |      |                       |       |                             |
| Element prediction: Off <sup>+</sup>                                                                        |            |                      |      |                       |       |                             |
| Monoisotopic Mass, Odd and Even Electron Ions <sup>+</sup>                                                  |            |                      |      |                       |       |                             |
| 275 formula(e) evaluated with 2 results within limits (all results (up to 1000) for each mass) <sup>+</sup> |            |                      |      |                       |       |                             |
| Elements Used: C: 0-60 H: 0-80 N: 0-2 O: 0-2 F: 0-6 Br: 0-1 <sup>+</sup>                                    |            |                      |      |                       |       |                             |
| Minimum: -1.5 <sup>+</sup>                                                                                  |            |                      |      |                       |       |                             |
| Maximum: 50.0 <sup>+</sup>                                                                                  |            |                      |      |                       |       |                             |
| Mass                                                                                                        | Calc. Mass | mDa                  | PPM  | DBE                   | i-FIT | Formula <sup>+</sup>        |
| 243.1624                                                                                                    | 243.1623   | 0.1                  | 0.4  | 7.0                   | 4.3   | C16 H21 N O <sup>+</sup>    |
|                                                                                                             | 243.1635   | -1.1                 | -4.5 | 3.0                   | 6.9   | C13 H22 N O2 F <sup>+</sup> |

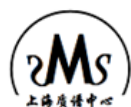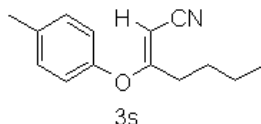

Shanghai Mass Spectrometry Center  
 Shanghai Institute of Organic Chemistry  
 Chinese Academic of Sciences  
 High Resolution MS Data Report

Instrument: Waters Micromass GCT Premier      Ionisation Mode: EI+      Electron Energy: 70eV

Card Serial Number: GCT-P-T12-03-OS0205<sup>+</sup>

Sample Serial Number: HBSF-LM15-S7<sup>+</sup>

Operator: Li<sup>+</sup>

Date: 2012/03/23<sup>+</sup>

Elemental Composition Report<sup>+</sup>

Single Mass Analysis <sup>+</sup>

Tolerance = 5.0 PPM / DBE: min = -1.5, max = 50.0<sup>+</sup>

Element prediction: Off <sup>+</sup>

Monoisotopic Mass, Odd and Even Electron Ions<sup>+</sup>

145 formula(e) evaluated with 2 results within limits (all results (up to 1000) for each mass)<sup>+</sup>

Elements Used: C: 0-60    H: 0-80    N: 0-2    O: 0-6    Cl: 0-1    I: 0-1 <sup>+</sup>

| Mass     | Calc. Mass | mDa  | PPM  | DBE | i-FIT     | Formula <sup>+</sup>       |
|----------|------------|------|------|-----|-----------|----------------------------|
| 215.1307 | 215.1310   | -0.3 | -1.4 | 7.0 | 2.2...    | C14 H17 N O <sup>+</sup>   |
|          | 215.1315   | -0.8 | -3.7 | 2.5 | 2025.2... | C11 H20 N2 C1 <sup>+</sup> |

<sup>+</sup>

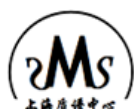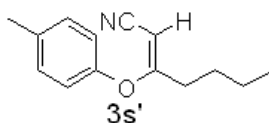

Shanghai Mass Spectrometry Center  
 Shanghai Institute of Organic Chemistry  
 Chinese Academic of Sciences  
 High Resolution MS Data Report

Instrument: Waters Micromass GCT Premier      Ionisation Mode: EI+      Electron Energy: 70eV

Card Serial Number: GCT-P-T12-03-OS0206<sup>+</sup>

Sample Serial Number: HBSF-LM15-S8<sup>+</sup>

Operator: Li<sup>+</sup>

Date: 2012/03/23<sup>+</sup>

Elemental Composition Report<sup>+</sup>

Single Mass Analysis <sup>+</sup>

Tolerance = 5.0 PPM / DBE: min = -1.5, max = 50.0<sup>+</sup>

Element prediction: Off <sup>+</sup>

Monoisotopic Mass, Odd and Even Electron Ions<sup>+</sup>

145 formula(e) evaluated with 2 results within limits (all results (up to 1000) for each mass)<sup>+</sup>

Elements Used: C: 0-60    H: 0-80    N: 0-2    O: 0-6    Cl: 0-1    I: 0-1 <sup>+</sup>

| Mass     | Calc. Mass | mDa  | PPM  | DBE | i-FIT    | Formula <sup>+</sup>       |
|----------|------------|------|------|-----|----------|----------------------------|
| 215.1311 | 215.1310   | 0.1  | 0.5  | 7.0 | 1.7...   | C14 H17 N O <sup>+</sup>   |
|          | 215.1315   | -0.4 | -1.9 | 2.5 | 831.6... | C11 H20 N2 C1 <sup>+</sup> |

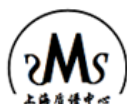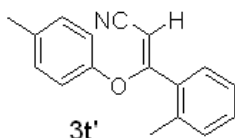

Shanghai Mass Spectrometry Center  
 Shanghai Institute of Organic Chemistry  
 Chinese Academic of Sciences  
 High Resolution MS Data Report

Instrument: Waters Micromass GCT Premier Ionisation Mode: EI+ Electron Energy: 70eV

Card Serial Number: GCT-P-T12-03-OS0213

Sample Serial Number: HBSF-LM15-S15

Operator: Li

Date: 2012/03/28

Elemental Composition Report

Single Mass Analysis

Tolerance = 5.0 PPM / DBE: min = -1.5, max = 50.0

Element prediction: Off

Monoisotopic Mass, Odd and Even Electron Ions

285 formula(e) evaluated with 3 results within limits (all results (up to 1000) for each mass)

Elements Used: C: 0-60 H: 0-80 N: 0-2 O: 0-2 F: 0-6 Br: 0-1

Minimum:

Maximum: 2.0 5.0 50.0

| Mass     | Calc. Mass | mDa  | PPM  | DBE  | i-FIT | Formula        |
|----------|------------|------|------|------|-------|----------------|
| 249.1158 | 249.1154   | 0.4  | 1.6  | 11.0 | 0.3   | C17 H15 N O    |
|          | 249.1152   | 0.6  | 2.4  | 0.0  | 88.6  | C9 H16 N O F5  |
|          | 249.1165   | -0.7 | -2.8 | 7.0  | 10.1  | C14 H16 N O2 F |

↵

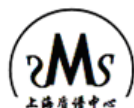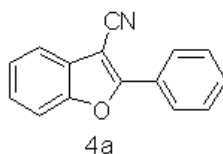

Shanghai Mass Spectrometry Center  
 Shanghai Institute of Organic Chemistry  
 Chinese Academic of Sciences  
 High Resolution MS Data Report

Instrument: Waters Micromass GCT Premier Ionisation Mode: EI+ Electron Energy: 70eV

Card Serial Number: GCT-P-T11-12-OS0920

Sample Serial Number: HBSF-D28-S9

Operator: Li

Date: 2011/12/15

Elemental Composition Report

Single Mass Analysis

Tolerance = 5.0 PPM / DBE: min = -1.5, max = 50.0

Element prediction: Off

Monoisotopic Mass, Odd and Even Electron Ions

297 formula(e) evaluated with 3 results within limits (all results (up to 1000) for each mass)

Elements Used: C: 0-60 H: 0-80 N: 0-4 O: 0-6 S: 0-1 Br: 0-1

Minimum:

Maximum: 2.0 5.0 50.0

| Mass     | Calc. Mass | mDa  | PPM  | DBE  | i-FIT | Formula        |
|----------|------------|------|------|------|-------|----------------|
| 219.0687 | 219.0684   | 0.3  | 1.4  | 12.0 | 8.8   | C15 H9 N O     |
|          | 219.0691   | -0.4 | -1.8 | 2.5  | 41.8  | C9 H15 O4 S    |
|          | 219.0678   | 0.9  | 4.1  | 3.0  | 45.3  | C7 H13 N3 O3 S |

↵

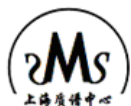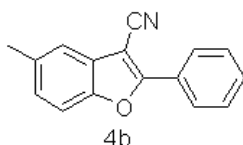

Shanghai Mass Spectrometry Center  
Shanghai Institute of Organic Chemistry  
Chinese Academic of Sciences  
High Resolution MS Data Report

Instrument: Waters Micromass GCT Premier      Ionisation Mode: EI+      Electron Energy: 70eV

Card Serial Number: GCT-P-T11-12-OS0923<sup>+</sup>  
Sample Serial Number: HBSF-D28-S12<sup>+</sup>  
Operator: Li<sup>+</sup>  
Date: 2011/12/15<sup>+</sup>  
Elemental Composition Report<sup>+</sup>  
Single Mass Analysis <sup>+</sup>  
Tolerance = 5.0 PPM / DBE: min = -1.5, max = 50.0<sup>+</sup>  
Element prediction: Off <sup>+</sup>  
Monoisotopic Mass, Odd and Even Electron Ions<sup>+</sup>  
317 formula (e) evaluated with 3 results within limits (all results (up to 1000) for each mass)<sup>+</sup>  
Elements Used: C: 0-60    H: 0-80    N: 0-4    O: 0-6    S: 0-1    Br: 0-1    <sup>+</sup>

| Mass     | Calc. Mass | mDa  | PPM  | DBE  | i-FIT     | Formula <sup>+</sup>        |
|----------|------------|------|------|------|-----------|-----------------------------|
| 233.0844 | 233.0841   | 0.3  | 1.3  | 12.0 | 31.3...   | C16 H11 N O <sup>+</sup>    |
|          | 233.0848   | -0.4 | -1.7 | 2.5  | 1305.0... | C10 H17 O4 S <sup>+</sup>   |
|          | 233.0834   | 1.0  | 4.3  | 3.0  | 1302.1... | C8 H15 N3 O3 S <sup>+</sup> |

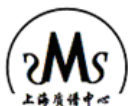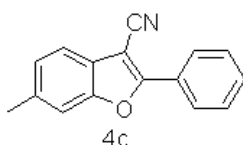

Shanghai Mass Spectrometry Center  
Shanghai Institute of Organic Chemistry  
Chinese Academic of Sciences  
High Resolution MS Data Report

Instrument: Waters Micromass GCT Premier      Ionisation Mode: EI+      Electron Energy: 70eV

Card Serial Number: GCT-P-T11-12-OS0922<sup>+</sup>  
Sample Serial Number: HBSF-D28-S11<sup>+</sup>  
Operator: Li<sup>+</sup>  
Date: 2011/12/15<sup>+</sup>  
Elemental Composition Report<sup>+</sup>  
Single Mass Analysis <sup>+</sup>  
Tolerance = 5.0 PPM / DBE: min = -1.5, max = 50.0<sup>+</sup>  
Element prediction: Off <sup>+</sup>  
Monoisotopic Mass, Odd and Even Electron Ions<sup>+</sup>  
317 formula (e) evaluated with 3 results within limits (all results (up to 1000) for each mass)<sup>+</sup>  
Elements Used: C: 0-60    H: 0-80    N: 0-4    O: 0-6    S: 0-1    Br: 0-1    <sup>+</sup>

| Mass     | Calc. Mass | mDa  | PPM  | DBE  | i-FIT    | Formula <sup>+</sup>        |
|----------|------------|------|------|------|----------|-----------------------------|
| 233.0842 | 233.0841   | 0.1  | 0.4  | 12.0 | 8.0...   | C16 H11 N O <sup>+</sup>    |
|          | 233.0848   | -0.6 | -2.6 | 2.5  | 596.9... | C10 H17 O4 S <sup>+</sup>   |
|          | 233.0834   | 0.8  | 3.4  | 3.0  | 567.9... | C8 H15 N3 O3 S <sup>+</sup> |

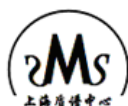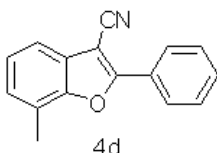

Shanghai Mass Spectrometry Center  
Shanghai Institute of Organic Chemistry  
Chinese Academic of Sciences  
High Resolution MS Data Report

Instrument: Waters Micromass GCT Premier      Ionisation Mode: EI+      Electron Energy: 70eV

Card Serial Number: GCT-P-T11-12-0S0921<sup>+</sup>  
Sample Serial Number: HBSF-D28-S10<sup>+</sup>  
Operator: Li<sup>+</sup>  
Date: 2011/12/15<sup>+</sup>  
Elemental Composition Report<sup>+</sup>  
Single Mass Analysis<sup>+</sup>  
Tolerance = 5.0 PPM / DBE: min = -1.5, max = 50.0<sup>+</sup>  
Element prediction: Off<sup>+</sup>  
Monoisotopic Mass, Odd and Even Electron Ions<sup>+</sup>  
317 formula(e) evaluated with 3 results within limits (all results (up to 1000) for each mass)<sup>+</sup>  
Elements Used: C: 0-60    H: 0-80    N: 0-4    O: 0-6    S: 0-1    Br: 0-1    <sup>+</sup>

| Mass     | Calc. Mass | mDa  | PPM  | DBE  | i-FIT     | Formula <sup>+</sup>        |
|----------|------------|------|------|------|-----------|-----------------------------|
| 233.0845 | 233.0848   | -0.3 | -1.3 | 2.5  | 2764.2... | C10 H17 O4 S <sup>+</sup>   |
|          | 233.0841   | 0.4  | 1.7  | 12.0 | 42.5...   | C16 H11 N O <sup>+</sup>    |
|          | 233.0834   | 1.1  | 4.7  | 3.0  | 2626.9... | C8 H15 N3 O3 S <sup>+</sup> |

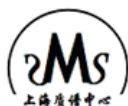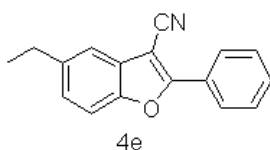

Shanghai Mass Spectrometry Center  
Shanghai Institute of Organic Chemistry  
Chinese Academic of Sciences  
High Resolution MS Data Report

Instrument: Waters Micromass GCT Premier      Ionisation Mode: EI+      Electron Energy: 70eV

Card Serial Number: GCT-P-T11-12-0S0924<sup>+</sup>  
Sample Serial Number: HBSF-D28-S13<sup>+</sup>  
Operator: Li<sup>+</sup>  
Date: 2011/12/15<sup>+</sup>  
Elemental Composition Report<sup>+</sup>  
Single Mass Analysis<sup>+</sup>  
Tolerance = 5.0 PPM / DBE: min = -1.5, max = 50.0<sup>+</sup>  
Element prediction: Off<sup>+</sup>  
Monoisotopic Mass, Odd and Even Electron Ions<sup>+</sup>  
346 formula(e) evaluated with 3 results within limits (all results (up to 1000) for each mass)<sup>+</sup>  
Elements Used: C: 0-60    H: 0-80    N: 0-4    O: 0-6    S: 0-1    Br: 0-1    <sup>+</sup>

| Mass     | Calc. Mass | mDa  | PPM  | DBE  | i-FIT     | Formula <sup>+</sup>        |
|----------|------------|------|------|------|-----------|-----------------------------|
| 247.0999 | 247.0997   | 0.2  | 0.8  | 12.0 | 19.7...   | C17 H13 N O <sup>+</sup>    |
|          | 247.1004   | -0.5 | -2.0 | 2.5  | 1960.0... | C11 H19 O4 S <sup>+</sup>   |
|          | 247.0991   | 0.8  | 3.2  | 3.0  | 1866.9... | C9 H17 N3 O3 S <sup>+</sup> |



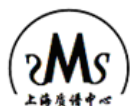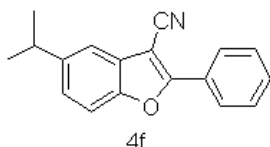

Shanghai Mass Spectrometry Center  
 Shanghai Institute of Organic Chemistry  
 Chinese Academic of Sciences  
 High Resolution MS Data Report

Instrument: Waters Micromass GCT Premier      Ionisation Mode: EI+      Electron Energy: 70eV

---

Card Serial Number: GCT-P-T11-12-OS0925<sup>+</sup>  
 Sample Serial Number: HBSF-D28-S14<sup>+</sup>  
 Operator: Li<sup>+</sup>  
 Date: 2011/12/15<sup>+</sup>  
 Elemental Composition Report<sup>+</sup>  
 Single Mass Analysis<sup>+</sup>  
 Tolerance = 5.0 PPM / DBE: min = -1.5, max = 50.0<sup>+</sup>  
 Element prediction: Off<sup>+</sup>  
 Monoisotopic Mass, Odd and Even Electron Ions<sup>+</sup>  
 367 formula (e) evaluated with 4 results within limits (all results (up to 1000) for each mass)<sup>+</sup>  
 Elements Used: C: 0-60    H: 0-80    N: 0-4    O: 0-6    S: 0-1    Br: 0-1<sup>+</sup>

| Mass     | Calc. Mass | mDa  | PPM  | DBE  | i-FIT        | Formula <sup>+</sup>         |
|----------|------------|------|------|------|--------------|------------------------------|
| 261.1151 | 261.1154   | -0.3 | -1.1 | 12.0 | 2782052.8... | C18 H15 N O <sup>+</sup>     |
|          | 261.1147   | 0.4  | 1.5  | 3.0  | 2783190.0... | C10 H19 N3 O3 S <sup>+</sup> |
|          | 261.1161   | -1.0 | -3.8 | 2.5  | 2783207.3... | C12 H21 O4 S <sup>+</sup>    |
|          | 261.1140   | 1.1  | 4.2  | 12.5 | 2781507.5... | C16 H13 N4 <sup>+</sup>      |

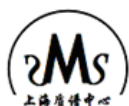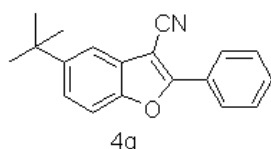

Shanghai Mass Spectrometry Center  
 Shanghai Institute of Organic Chemistry  
 Chinese Academic of Sciences  
 High Resolution MS Data Report

Instrument: Waters Micromass GCT Premier      Ionisation Mode: EI+      Electron Energy: 70eV

---

Card Serial Number: GCT-P-T11-12-OS0926<sup>+</sup>  
 Sample Serial Number: HBSF-D28-S15<sup>+</sup>  
 Operator: Li<sup>+</sup>  
 Date: 2011/12/15<sup>+</sup>  
 Elemental Composition Report<sup>+</sup>  
 Single Mass Analysis<sup>+</sup>  
 Tolerance = 5.0 PPM / DBE: min = -1.5, max = 50.0<sup>+</sup>  
 Element prediction: Off<sup>+</sup>  
 Monoisotopic Mass, Odd and Even Electron Ions<sup>+</sup>  
 396 formula(e) evaluated with 4 results within limits (all results (up to 1000) for each mass)<sup>+</sup>  
 Elements Used: C: 0-60    H: 0-80    N: 0-4    O: 0-6    S: 0-1    Br: 0-1<sup>+</sup>

| Mass     | Calc. Mass | mDa  | PPM  | DBE  | i-FIT        | Formula <sup>+</sup>         |
|----------|------------|------|------|------|--------------|------------------------------|
| 275.1307 | 275.1304   | 0.3  | 1.1  | 3.0  | 2781439.3... | C11 H21 N3 O3 S <sup>+</sup> |
|          | 275.1310   | -0.3 | -1.1 | 12.0 | 2780515.5... | C19 H17 N O <sup>+</sup>     |
|          | 275.1317   | -1.0 | -3.6 | 2.5  | 2781455.3... | C13 H23 O4 S <sup>+</sup>    |
|          | 275.1297   | 1.0  | 3.6  | 12.5 | 2780103.5... | C17 H15 N4 <sup>+</sup>      |

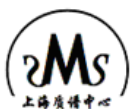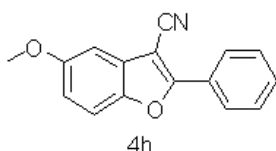

Shanghai Mass Spectrometry Center  
 Shanghai Institute of Organic Chemistry  
 Chinese Academic of Sciences  
 High Resolution MS Data Report

Instrument: Waters Micromass GCT Premier Ionisation Mode: EI+ Electron Energy: 70eV

Card Serial Number: GCT-P-T11-12-0S0927<sup>+</sup>  
 Sample Serial Number: HBSF-D28-S16<sup>+</sup>  
 Operator: Li<sup>+</sup>  
 Date: 2011/12/15<sup>+</sup>  
 Elemental Composition Report<sup>+</sup>  
 Single Mass Analysis <sup>+</sup>  
 Tolerance = 5.0 PPM / DBE: min = -1.5, max = 50.0<sup>+</sup>  
 Element prediction: Off <sup>+</sup>  
 Monoisotopic Mass, Odd and Even Electron Ions<sup>+</sup>  
 347 formula(e) evaluated with 3 results within limits (all results (up to 1000) for each mass)<sup>+</sup>  
 Elements Used: C: 0-60 H: 0-80 N: 0-4 O: 0-6 S: 0-1 Br: 0-1 <sup>+</sup>

| Mass     | Calc. Mass | mDa  | PPM  | DBE  | i-FIT        | Formula <sup>+</sup>        |
|----------|------------|------|------|------|--------------|-----------------------------|
| 249.0791 | 249.0790   | 0.1  | 0.4  | 12.0 | 2785364.5... | C16 H11 N O2 <sup>+</sup>   |
|          | 249.0797   | -0.6 | -2.4 | 2.5  | 4675.6...    | C10 H17 O5 S <sup>+</sup>   |
|          | 249.0783   | 0.8  | 3.2  | 3.0  | 4433.3...    | C8 H15 N3 O4 S <sup>+</sup> |

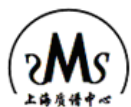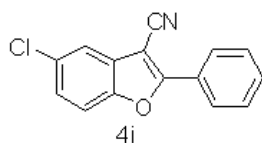

Shanghai Mass Spectrometry Center  
 Shanghai Institute of Organic Chemistry  
 Chinese Academic of Sciences  
 High Resolution MS Data Report

Instrument: Waters Micromass GCT Premier Ionisation Mode: EI+ Electron Energy: 70eV

Card Serial Number: GCT-P-T11-12-0S0928<sup>+</sup>  
 Sample Serial Number: HBSF-D28-S17<sup>+</sup>  
 Operator: Li<sup>+</sup>  
 Date: 2011/12/15<sup>+</sup>  
 Elemental Composition Report<sup>+</sup>  
 Single Mass Analysis <sup>+</sup>  
 Tolerance = 5.0 PPM / DBE: min = -1.5, max = 50.0<sup>+</sup>  
 Element prediction: Off <sup>+</sup>  
 Monoisotopic Mass, Odd and Even Electron Ions<sup>+</sup>  
 394 formula(e) evaluated with 6 results within limits (all results (up to 1000) for each mass)<sup>+</sup>  
 Elements Used: C: 0-60 H: 0-80 N: 0-4 O: 0-6 S: 0-1 Cl: 0-1 <sup>+</sup>

| Mass     | Calc. Mass | mDa  | PPM  | DBE  | i-FIT     | Formula <sup>+</sup>           |
|----------|------------|------|------|------|-----------|--------------------------------|
| 253.0292 | 253.0290   | 0.2  | 0.8  | 16.5 | 6286.1... | C18 H5 O2 <sup>+</sup>         |
|          | 253.0294   | -0.2 | -0.8 | 12.0 | 36.1...   | C15 H8 N O C1 <sup>+</sup>     |
|          | 253.0288   | 0.4  | 1.6  | 3.0  | 663.3...  | C7 H12 N3 O3 S C1 <sup>+</sup> |
|          | 253.0301   | -0.9 | -3.6 | 2.5  | 499.1...  | C9 H14 O4 S C1 <sup>+</sup>    |
|          | 253.0283   | 0.9  | 3.6  | 7.5  | 4625.2... | C10 H9 N2 O4 S <sup>+</sup>    |
|          | 253.0281   | 1.1  | 4.3  | 12.5 | 26.8...   | C13 H6 N4 C1 <sup>+</sup>      |

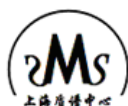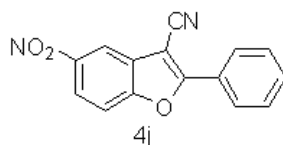

Shanghai Mass Spectrometry Center  
 Shanghai Institute of Organic Chemistry  
 Chinese Academic of Sciences  
 High Resolution MS Data Report

Instrument: Waters Micromass GCT Premier Ionisation Mode: EI+ Electron Energy: 70eV

Card Serial Number: GCT-P-T11-12-OS0929

Sample Serial Number: HBSF-D28-S18

Operator: Li

Date: 2011/12/15

Elemental Composition Report

Single Mass Analysis

Tolerance = 5.0 PPM / DBE: min = -1.5, max = 50.0

Element prediction: Off

Monoisotopic Mass, Odd and Even Electron Ions

416 formula(e) evaluated with 5 results within limits (all results (up to 1000) for each mass)

Elements Used: C: 0-60 H: 0-80 N: 0-4 O: 0-6 S: 0-1 Cl: 0-1

| Mass     | Calc. Mass | mDa  | PPM  | DBE  | i-FIT     | Formula           |
|----------|------------|------|------|------|-----------|-------------------|
| 264.0538 | 264.0540   | -0.2 | -0.8 | 8.5  | 2776455.3 | C12 H11 N3 O2 Cl  |
|          | 264.0535   | 0.3  | 1.1  | 13.0 | 2775352.8 | C15 H8 N2 O3      |
|          | 264.0542   | -0.4 | -1.5 | 3.5  | 2776294.8 | C9 H14 N O6 S     |
|          | 264.0547   | -0.9 | -3.4 | -1.0 | 2776457.3 | C6 H17 N2 O5 S Cl |
|          | 264.0528   | 1.0  | 3.8  | 4.0  | 2776282.3 | C7 H12 N4 O5 S    |

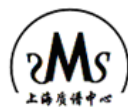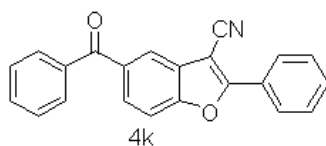

Shanghai Mass Spectrometry Center  
 Shanghai Institute of Organic Chemistry  
 Chinese Academic of Sciences  
 High Resolution MS Data Report

Instrument: Waters Micromass GCT Premier Ionisation Mode: EI+ Electron Energy: 70eV

Card Serial Number: GCT-P-T11-12-OS0930

Sample Serial Number: HBSF-D28-S19

Operator: Li

Date: 2011/12/15

Elemental Composition Report

Single Mass Analysis

Tolerance = 5.0 PPM / DBE: min = -1.5, max = 50.0

Element prediction: Off

Monoisotopic Mass, Odd and Even Electron Ions

514 formula(e) evaluated with 7 results within limits (all results (up to 1000) for each mass)

Elements Used: C: 0-60 H: 0-80 N: 0-4 O: 0-6 S: 0-1 Cl: 0-1

| Mass     | Calc. Mass | mDa  | PPM  | DBE  | i-FIT     | Formula            |
|----------|------------|------|------|------|-----------|--------------------|
| 323.0952 | 323.0953   | -0.1 | -0.3 | 7.5  | 2774933.5 | C16 H19 O5 S       |
|          | 323.0951   | 0.1  | 0.3  | 12.5 | 2775069.0 | C19 H16 N2 O Cl    |
|          | 323.0946   | 0.6  | 1.9  | 17.0 | 2774555.8 | C22 H13 N O2       |
|          | 323.0958   | -0.6 | -1.9 | 3.0  | 2775071.3 | C13 H22 N O4 S Cl  |
|          | 323.0945   | 0.7  | 2.2  | 3.5  | 2775071.0 | C11 H20 N4 O3 S Cl |
|          | 323.0940   | 1.2  | 3.7  | 8.0  | 2774920.0 | C14 H17 N3 O4 S    |
|          | 323.0967   | -1.5 | -4.6 | 12.5 | 2774915.8 | C17 H15 N4 O S     |

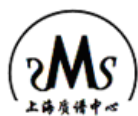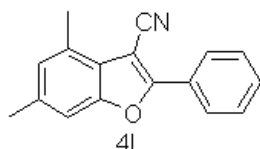

Shanghai Mass Spectrometry Center  
 Shanghai Institute of Organic Chemistry  
 Chinese Academic of Sciences  
 High Resolution MS Data Report

Instrument: Waters Micromass GCT Premier      Ionisation Mode: EI+      Electron Energy: 70eV

---

Card Serial Number: GCT-P-T11-12-OS0933<sup>+</sup>  
 Sample Serial Number: HBSF-D28-S22<sup>+</sup>  
 Operator: Li<sup>+</sup>  
 Date: 2011/12/15<sup>+</sup>  
 Elemental Composition Report<sup>+</sup>  
 Single Mass Analysis <sup>+</sup>  
 Tolerance = 5.0 PPM / DBE: min = -1.5, max = 50.0<sup>+</sup>  
 Element prediction: Off <sup>+</sup>  
 Monoisotopic Mass, Odd and Even Electron Ions<sup>+</sup>  
 346 formula(e) evaluated with 3 results within limits (all results (up to 1000) for each mass)<sup>+</sup>  
 Elements Used: C: 0-60 H: 0-80 N: 0-4 O: 0-6 S: 0-1 Br: 0-1 <sup>+</sup>

| Minimum: |            | 2.0  | 5.0  | -1.5 <sup>+</sup> |           |                             |
|----------|------------|------|------|-------------------|-----------|-----------------------------|
| Maximum: |            |      |      | 50.0 <sup>+</sup> |           |                             |
| Mass     | Calc. Mass | mDa  | PPM  | DBE               | i-FIT     | Formula <sup>+</sup>        |
| 247.1001 | 247.1004   | -0.3 | -1.2 | 2.5               | 1044.3... | C11 H19 O4 S <sup>+</sup>   |
|          | 247.0997   | 0.4  | 1.6  | 12.0              | 12.3...   | C17 H13 N O <sup>+</sup>    |
|          | 247.0991   | 1.0  | 4.0  | 3.0               | 994.5...  | C9 H17 N3 O3 S <sup>+</sup> |

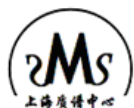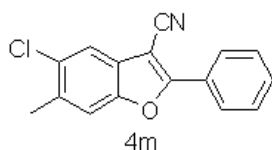

Shanghai Mass Spectrometry Center  
 Shanghai Institute of Organic Chemistry  
 Chinese Academic of Sciences  
 High Resolution MS Data Report

Instrument: Waters Micromass GCT Premier      Ionisation Mode: EI+      Electron Energy: 70eV

---

Card Serial Number: GCT-P-T11-12-OS0932<sup>+</sup>  
 Sample Serial Number: HBSF-D28-S21<sup>+</sup>  
 Operator: Li<sup>+</sup>  
 Date: 2011/12/15<sup>+</sup>  
 Elemental Composition Report<sup>+</sup>  
 Single Mass Analysis <sup>+</sup>  
 Tolerance = 5.0 PPM / DBE: min = -1.5, max = 50.0<sup>+</sup>  
 Element prediction: Off <sup>+</sup>  
 Monoisotopic Mass, Odd and Even Electron Ions<sup>+</sup>  
 422 formula(e) evaluated with 5 results within limits (all results (up to 1000) for each mass)<sup>+</sup>  
 Elements Used: C: 0-60 H: 0-80 N: 0-4 O: 0-6 S: 0-1 Cl: 0-1 <sup>+</sup>

| Minimum: |            | 2.0  | 5.0  | -1.5 <sup>+</sup> |           |                                |
|----------|------------|------|------|-------------------|-----------|--------------------------------|
| Maximum: |            |      |      | 50.0 <sup>+</sup> |           |                                |
| Mass     | Calc. Mass | mDa  | PPM  | DBE               | i-FIT     | Formula <sup>+</sup>           |
| 267.0452 | 267.0451   | 0.1  | 0.4  | 12.0              | 74.7...   | C16 H10 N O Cl <sup>+</sup>    |
|          | 267.0446   | 0.6  | 2.2  | 16.5              | 2385.0... | C19 H7 O2 <sup>+</sup>         |
|          | 267.0458   | -0.6 | -2.2 | 2.5               | 509.2...  | C10 H16 O4 S Cl <sup>+</sup>   |
|          | 267.0444   | 0.8  | 3.0  | 3.0               | 591.7...  | C8 H14 N3 O3 S Cl <sup>+</sup> |
|          | 267.0440   | 1.2  | 4.5  | 7.5               | 1972.8... | C11 H11 N2 O4 S <sup>+</sup>   |

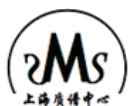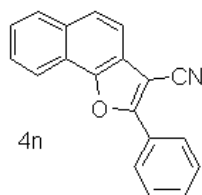

Shanghai Mass Spectrometry Center  
 Shanghai Institute of Organic Chemistry  
 Chinese Academic of Sciences  
 High Resolution MS Data Report

Instrument: Waters Micromass GCT Premier      Ionisation Mode: EI+      Electron Energy: 70eV

Card Serial Number: GCT-P-T11-i2-OS0931<sup>+</sup>  
 Sample Serial Number: HBSF-D28-S20<sup>+</sup>  
 Operator: Li<sup>+</sup>  
 Date: 2011/12/15<sup>+</sup>  
 Elemental Composition Report<sup>+</sup>  
 Single Mass Analysis<sup>+</sup>  
 Tolerance = 5.0 PPM / DBE: min = -1.5, max = 50.0<sup>+</sup>  
 Element prediction: Off<sup>+</sup>  
 Monoisotopic Mass, Odd and Even Electron Ions<sup>+</sup>  
 420 formula(e) evaluated with 6 results within limits (all results (up to 1000) for each mass)<sup>+</sup>  
 Elements Used: C: 0-60    H: 0-80    N: 0-4    O: 0-6    S: 0-1    Cl: 0-1    <sup>+</sup>

| Mass     | Calc. Mass | mDa  | PPM  | DBE  | i-FIT  | Formula <sup>+</sup>           |
|----------|------------|------|------|------|--------|--------------------------------|
| 269.0843 | 269.0841   | 0.2  | 0.7  | 15.0 | 28.1   | C19 H11 N O <sup>+</sup>       |
|          | 269.0846   | -0.3 | -1.1 | 10.5 | 6952.9 | C16 H14 N2 C1 <sup>+</sup>     |
|          | 269.0839   | 0.4  | 1.5  | 1.5  | 7387.8 | C8 H18 N4 O2 S C1 <sup>+</sup> |
|          | 269.0848   | -0.5 | -1.9 | 5.5  | 954.5  | C13 H17 O4 S <sup>+</sup>      |
|          | 269.0852   | -0.9 | -3.3 | 1.0  | 7382.6 | C10 H20 N O3 S C1 <sup>+</sup> |
|          | 269.0834   | 0.9  | 3.3  | 6.0  | 892.5  | C11 H15 N3 O3 S <sup>+</sup>   |

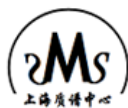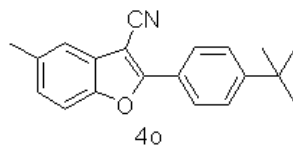

Shanghai Mass Spectrometry Center  
 Shanghai Institute of Organic Chemistry  
 Chinese Academic of Sciences  
 High Resolution MS Data Report

Instrument: Waters Micromass GCT Premier      Ionisation Mode: EI+      Electron Energy: 70eV

Card Serial Number: GCT-P-T12-03-OS0202<sup>+</sup>  
 Sample Serial Number: HBSF-LM15-S4<sup>+</sup>  
 Operator: Li<sup>+</sup>  
 Date: 2012/03/23<sup>+</sup>  
 Elemental Composition Report<sup>+</sup>  
 Single Mass Analysis<sup>+</sup>  
 Tolerance = 5.0 PPM / DBE: min = -1.5, max = 50.0<sup>+</sup>  
 Element prediction: Off<sup>+</sup>  
 Monoisotopic Mass, Odd and Even Electron Ions<sup>+</sup>  
 228 formula(e) evaluated with 2 results within limits (all results (up to 1000) for each mass)<sup>+</sup>  
 Elements Used: C: 0-60    H: 0-80    N: 0-2    O: 0-6    Cl: 0-1    I: 0-1    <sup>+</sup>

| Mass     | Calc. Mass | mDa | PPM | DBE  | i-FIT  | Formula <sup>+</sup>       |
|----------|------------|-----|-----|------|--------|----------------------------|
| 289.1472 | 289.1472   | 0.0 | 0.0 | 7.5  | 5364.5 | C17 H22 N2 C1 <sup>+</sup> |
|          | 289.1467   | 0.5 | 1.7 | 12.0 | 3.0    | C20 H19 N O <sup>+</sup>   |

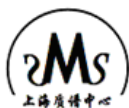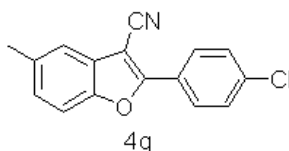

Shanghai Mass Spectrometry Center  
 Shanghai Institute of Organic Chemistry  
 Chinese Academic of Sciences  
 High Resolution MS Data Report

Instrument: Waters Micromass GCT Premier      Ionisation Mode: EI+      Electron Energy: 70eV

---

Card Serial Number: GCT-P-T12-03-0S0201<sup>+</sup>  
 Sample Serial Number: HBSF-LM15-S3<sup>+</sup>  
 Operator: Li<sup>+</sup>  
 Date: 2012/03/23<sup>+</sup>  
 Elemental Composition Report<sup>+</sup>  
 Single Mass Analysis <sup>+</sup>  
 Tolerance = 5.0 PPM / DBE: min = -1.5, max = 50.0<sup>+</sup>  
 Element prediction: Off <sup>+</sup>  
 Monoisotopic Mass, Odd and Even Electron Ions<sup>+</sup>  
 206 formula(e) evaluated with 2 results within limits (all results (up to 1000) for each mass)<sup>+</sup>  
 Elements Used: C: 0-60    H: 0-80    N: 0-2    O: 0-6    Cl: 0-1    I: 0-1    <sup>+</sup>

| Minimum:          | Maximum:          | Calc. Mass | mDa      | PPM | DBE | i-FIT  | Formula <sup>+</sup>        |
|-------------------|-------------------|------------|----------|-----|-----|--------|-----------------------------|
| -1.5 <sup>+</sup> | 50.0 <sup>+</sup> |            |          |     |     |        |                             |
|                   |                   | 267.0452   | 267.0451 | 0.1 | 0.4 | 235.3  | C16 H10 N O Cl <sup>+</sup> |
|                   |                   |            | 267.0446 | 0.6 | 2.2 | 1750.0 | C19 H7 O2 <sup>+</sup>      |

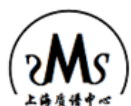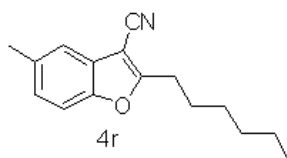

Shanghai Mass Spectrometry Center  
 Shanghai Institute of Organic Chemistry  
 Chinese Academic of Sciences  
 High Resolution MS Data Report

Instrument: Waters Micromass GCT Premier      Ionisation Mode: EI+      Electron Energy: 70eV

---

Card Serial Number: GCT-P-T12-03-0S0210<sup>+</sup>  
 Sample Serial Number: HBSF-LM15-S12<sup>+</sup>  
 Operator: Li<sup>+</sup>  
 Date: 2012/03/28<sup>+</sup>  
 Elemental Composition Report<sup>+</sup>  
 Single Mass Analysis <sup>+</sup>  
 Tolerance = 5.0 PPM / DBE: min = -1.5, max = 50.0<sup>+</sup>  
 Element prediction: Off <sup>+</sup>  
 Monoisotopic Mass, Odd and Even Electron Ions<sup>+</sup>  
 274 formula(e) evaluated with 2 results within limits (all results (up to 1000) for each mass)<sup>+</sup>  
 Elements Used: C: 0-60    H: 0-80    N: 0-2    O: 0-2    F: 0-6    Br: 0-1    <sup>+</sup>

| Minimum:          | Maximum:          | Calc. Mass | mDa      | PPM  | DBE  | i-FIT | Formula <sup>+</sup>        |
|-------------------|-------------------|------------|----------|------|------|-------|-----------------------------|
| -1.5 <sup>+</sup> | 50.0 <sup>+</sup> |            |          |      |      |       |                             |
|                   |                   | 241.1471   | 241.1467 | 0.4  | 1.7  | 1.9   | C16 H19 N O <sup>+</sup>    |
|                   |                   |            | 241.1478 | -0.7 | -2.9 | 15.4  | C13 H20 N O2 F <sup>+</sup> |
